# Supplementary material for: Prediagnostic plasma metabolite concentrations and liver cancer risk: a population-based study of Chinese men
Source: PubMed Central journal article supplement — eBioMedicine. 2024 Feb 1;100:104990. doi: 10.1016/j.ebiom.2024.104990 (PMC10847612; doi:10.1016/j.ebiom.2024.104990), 2024-02-01
Supplement: mmc1.pdf [file mmc1.pdf]

## **Prediagnostic plasma metabolite concentrations and liver cancer risk: a population-based study of Chinese men**

Zhuo-Ying Li<sup>a,b</sup>, Qiu-Ming Shen<sup>b</sup>, Jing Wang<sup>b</sup>, Jia-Yi Tuo<sup>b,c</sup>, Yu-Ting Tan<sup>b</sup>, Hong-Lan Li<sup>b</sup>, Yong-Bing Xiang<sup>b,a,c</sup>

### **Affiliations:**

<sup>a</sup> School of Public Health, Fudan University, Shanghai 200032, China

<sup>b</sup> State Key Laboratory of System Medicine for Cancer & Department of Epidemiology, Shanghai Cancer Institute, Renji Hospital, Shanghai Jiao Tong University School of Medicine, Shanghai 200032, China

<sup>c</sup> School of Public Health, Shanghai Jiaotong University School of Medicine, Shanghai 200025, China

**ORCID:** Zhuo-Ying Li (0000-0003-4592-7136), Yong-Bing Xiang (0000-0002-3840-9915)

**\*Correspondence to:** Yong-Bing Xiang, State Key Laboratory of System Medicine for Cancer & Department of Epidemiology, Shanghai Cancer Institute, Renji Hospital, Shanghai Jiao Tong University School of Medicine, No. 25, Lane 2200, Xie Tu Road, Shanghai, 200032, P. R. China. E-mail: ybxiang@shsci.org.

## Supplementary Tables

Supplementary Table ST1 List of the metabolites quantitated by the UPLC-MS/MS (Metabo-Profile, Shanghai, China)

| Metabolites             | Classes     | HMDB        | KEGG   | CV of pooled QC samples <sup>a</sup> |                |
|-------------------------|-------------|-------------|--------|--------------------------------------|----------------|
|                         |             |             |        | Average intra-batch CV               | Inter-batch CV |
| 2-Hydroxyglutaric acid  | Amino acids | HMDB0000606 | C01087 | 22.39                                | 26.33          |
| 2-Phenylglycine         | Amino acids | HMDB0002210 | NA     | 12.90                                | 22.81          |
| 5-Aminolevulinic acid   | Amino acids | HMDB0001149 | C00430 | 20.66                                | 20.26          |
| Alanine                 | Amino acids | HMDB0000161 | C00041 | 4.32                                 | 4.10           |
| alpha-Aminobutyric acid | Amino acids | HMDB0000452 | C02356 | 6.14                                 | 6.02           |
| Arginine                | Amino acids | HMDB0000517 | C00062 | 9.78                                 | 9.13           |
| Asparagine              | Amino acids | HMDB0000168 | C00152 | 5.52                                 | 5.21           |
| Aspartic acid           | Amino acids | HMDB0000191 | C00049 | 9.03                                 | 8.62           |
| beta-Alanine            | Amino acids | HMDB0000056 | C00099 | 15.01                                | 17.45          |
| Citrulline              | Amino acids | HMDB0000904 | C00327 | 7.41                                 | 7.30           |
| Creatine                | Amino acids | HMDB0000064 | C00300 | 5.87                                 | 6.25           |
| Dimethylglycine         | Amino acids | HMDB0000092 | C01026 | 7.56                                 | 7.10           |
| GABA                    | Amino acids | HMDB0000112 | C00334 | 16.48                                | 16.02          |
| Glutamic acid           | Amino acids | HMDB0000148 | C00025 | 4.90                                 | 4.84           |
| Glutamine               | Amino acids | HMDB0000641 | C00064 | 5.31                                 | 5.20           |
| Glycine                 | Amino acids | HMDB0000123 | C00037 | 3.79                                 | 3.73           |
| Hippuric acid           | Amino acids | HMDB0000714 | C01586 | 7.50                                 | 7.48           |
| Histidine               | Amino acids | HMDB0000177 | C00135 | 7.58                                 | 7.11           |
| Homoserine              | Amino acids | HMDB0000719 | C00263 | 13.03                                | 12.71          |
| Isoleucine              | Amino acids | HMDB0000172 | C00407 | 8.53                                 | 9.73           |
| Leucine                 | Amino acids | HMDB0000687 | C00123 | 4.50                                 | 4.68           |
| Lysine                  | Amino acids | HMDB0000182 | C00047 | 7.47                                 | 7.47           |
| Methionine              | Amino acids | HMDB0000696 | C00073 | 5.96                                 | 6.15           |
| Methylcysteine          | Amino acids | HMDB0002108 | NA     | 6.65                                 | 6.95           |
| N-Acetylglycine         | Amino acids | HMDB0000532 | NA     | 7.20                                 | 6.94           |
| N-Acetyls erine         | Amino acids | HMDB0002931 | NA     | 8.71                                 | 8.32           |

| Metabolites                    | Classes       | HMDB        | KEGG   | CV of pooled QC samples <sup>a</sup> |                |
|--------------------------------|---------------|-------------|--------|--------------------------------------|----------------|
|                                |               |             |        | Average intra-batch CV               | Inter-batch CV |
| N-Phenylacetylglutamine        | Amino acids   | HMDB0006344 | C04148 | 7.61                                 | 7.57           |
| Norvaline                      | Amino acids   | HMDB0013716 | C01799 | 5.74                                 | 5.54           |
| Ornithine                      | Amino acids   | HMDB0000214 | C00077 | 9.74                                 | 9.52           |
| Phenylalanine                  | Amino acids   | HMDB0000159 | C00079 | 6.82                                 | 6.67           |
| Pipecolic acid                 | Amino acids   | HMDB0000716 | C00408 | 6.66                                 | 6.94           |
| Proline                        | Amino acids   | HMDB0000162 | C00148 | 9.78                                 | 9.15           |
| Pyroglutamic acid              | Amino acids   | HMDB0000267 | C01879 | 6.71                                 | 6.77           |
| Sarcosine                      | Amino acids   | HMDB0000271 | C00213 | 12.09                                | 11.44          |
| Selenomethionine               | Amino acids   | HMDB0003966 | C05335 | 6.53                                 | 7.17           |
| Serine                         | Amino acids   | HMDB0000187 | C00065 | 5.21                                 | 4.91           |
| Threonine                      | Amino acids   | HMDB0000167 | C00188 | 6.41                                 | 6.12           |
| Tryptophan                     | Amino acids   | HMDB0000929 | C00078 | 8.24                                 | 7.69           |
| Tyrosine                       | Amino acids   | HMDB0000158 | C00082 | 3.56                                 | 3.65           |
| Valine                         | Amino acids   | HMDB0000883 | C00183 | 6.05                                 | 5.74           |
| ortho-Hydroxyphenylacetic acid | Benzenoids    | HMDB0000669 | C05852 | 14.79                                | 15.05          |
| Phenylacetic acid              | Benzenoids    | HMDB0000209 | C07086 | 15.67                                | 14.87          |
| Phenylpyruvic acid             | Benzenoids    | HMDB0000205 | C00166 | 14.20                                | 15.77          |
| 4-Hydroxybenzoic acid          | Benzoic acids | HMDB0000500 | C00156 | 21.05                                | 21.64          |
| m-Aminobenzoic acid            | Benzoic acids | HMDB0001891 | NA     | 28.48                                | 29.31          |
| m-Hydroxyhippuric acid         | Benzoic acids | HMDB0006116 | NA     | 13.64                                | 13.90          |
| Phthalic acid                  | Benzoic acids | HMDB0002107 | C01606 | 15.12                                | 14.79          |
| 7-DHCA                         | Bile acids    | NA          | C13154 | 26.20                                | 25.48          |
| apoCA                          | Bile acids    | NA          | NA     | 25.89                                | 25.59          |
| beta-HDCA                      | Bile acids    | HMDB0000664 | NA     | 13.88                                | 13.77          |
| CA                             | Bile acids    | HMDB0000619 | C00695 | 10.03                                | 11.11          |
| CDCA                           | Bile acids    | HMDB0000518 | C02528 | 8.64                                 | 8.20           |
| DCA                            | Bile acids    | HMDB0000626 | C04483 | 11.77                                | 10.91          |
| GCA                            | Bile acids    | HMDB0000138 | C01921 | 7.45                                 | 7.12           |
| GCDCA                          | Bile acids    | HMDB0000637 | C05466 | 5.86                                 | 5.98           |

| Metabolites                  | Classes       | HMDB        | KEGG   | CV of pooled QC samples <sup>a</sup> |                |
|------------------------------|---------------|-------------|--------|--------------------------------------|----------------|
|                              |               |             |        | Average intra-batch CV               | Inter-batch CV |
| GDCA                         | Bile acids    | HMDB0000631 | C05464 | 8.47                                 | 8.16           |
| GHCA                         | Bile acids    | HMDB0240607 | NA     | 19.29                                | 19.71          |
| GLCA                         | Bile acids    | HMDB0000698 | C15557 | 11.96                                | 11.85          |
| GLCA-3S                      | Bile acids    | HMDB0002639 | C11301 | 14.96                                | 15.96          |
| GUDCA                        | Bile acids    | HMDB0000708 | NA     | 9.94                                 | 10.38          |
| HCA                          | Bile acids    | HMDB0000760 | NA     | 15.29                                | 15.13          |
| HDCA                         | Bile acids    | HMDB0000733 | NA     | 26.60                                | 26.50          |
| LCA                          | Bile acids    | HMDB0000761 | C03990 | 19.32                                | 20.92          |
| TCA                          | Bile acids    | HMDB0000036 | C05122 | 8.53                                 | 8.19           |
| TCDCA                        | Bile acids    | HMDB0000951 | C05465 | 6.74                                 | 6.43           |
| TDCA                         | Bile acids    | HMDB0000896 | C05463 | 10.88                                | 10.35          |
| UCA                          | Bile acids    | HMDB0000917 | C17644 | 11.14                                | 12.77          |
| D-Xylulose                   | Carbohydrates | HMDB0001644 | C00310 | 14.78                                | 14.28          |
| Fructose                     | Carbohydrates | HMDB0000660 | C02336 | 4.50                                 | 4.50           |
| Galactonic acid              | Carbohydrates | HMDB0000565 | C00880 | 19.84                                | 19.96          |
| Gluconolactone               | Carbohydrates | HMDB0000150 | C00198 | 10.03                                | 9.51           |
| Glucose                      | Carbohydrates | HMDB0000122 | C00221 | 3.18                                 | 2.98           |
| Glutaconic acid              | Carbohydrates | HMDB0000620 | C02214 | 13.68                                | 12.80          |
| Glyceric acid                | Carbohydrates | HMDB0000139 | C00258 | 5.99                                 | 6.11           |
| Maltose/Lactose              | Carbohydrates | NA          | NA     | 14.56                                | 14.21          |
| N-Acetylneuraminic acid      | Carbohydrates | HMDB0000230 | C19910 | 8.12                                 | 7.87           |
| Rhamnose                     | Carbohydrates | HMDB0000849 | C00507 | 27.87                                | 28.97          |
| Tartaric acid                | Carbohydrates | HMDB0000956 | C00898 | 8.18                                 | 7.87           |
| Threonic acid                | Carbohydrates | HMDB0000943 | C01620 | 9.30                                 | 9.21           |
| Trehalose                    | Carbohydrates | HMDB0000975 | C01083 | 4.61                                 | 4.50           |
| Xylose                       | Carbohydrates | HMDB0000098 | C00181 | 20.24                                | 20.00          |
| 2-Methylbutyrylcarnitine     | Carnitines    | HMDB0000378 | NA     | 6.79                                 | 7.02           |
| 3-Hydroxyisovalerylcarnitine | Carnitines    | HMDB0061189 | NA     | 10.77                                | 13.45          |
| Acetylcarnitine              | Carnitines    | HMDB0000201 | C02571 | 9.26                                 | 8.71           |

| Metabolites                    | Classes     | HMDB        | KEGG   | CV of pooled QC samples <sup>a</sup> |                |
|--------------------------------|-------------|-------------|--------|--------------------------------------|----------------|
|                                |             |             |        | Average intra-batch CV               | Inter-batch CV |
| Adipoylcarnitine               | Carnitines  | HMDB0061677 | NA     | 9.65                                 | 13.85          |
| Carnitine                      | Carnitines  | HMDB0000062 | C00318 | 3.46                                 | 3.38           |
| Decanoylcarnitine              | Carnitines  | HMDB0000651 | NA     | 5.70                                 | 5.63           |
| Glutaryl carnitine             | Carnitines  | HMDB0013130 | NA     | 5.07                                 | 5.36           |
| Hexanylcarnitine               | Carnitines  | HMDB0000705 | NA     | 9.41                                 | 11.04          |
| Isovelarylcarnitine            | Carnitines  | HMDB0000688 | NA     | 6.80                                 | 6.95           |
| Lauroyl carnitine              | Carnitines  | HMDB0002250 | NA     | 4.89                                 | 4.69           |
| Linoleyl carnitine             | Carnitines  | HMDB0006469 | NA     | 6.00                                 | 5.75           |
| Malonylcarnitine               | Carnitines  | HMDB0002095 | NA     | 26.43                                | 27.05          |
| Myristoylcarnitine             | Carnitines  | HMDB0005066 | NA     | 5.78                                 | 6.59           |
| Octanoylcarnitine              | Carnitines  | HMDB0000791 | C02838 | 3.35                                 | 3.20           |
| Oleylcarnitine                 | Carnitines  | HMDB0005065 | NA     | 5.82                                 | 5.72           |
| Palmitoylcarnitine             | Carnitines  | HMDB0000222 | C02990 | 6.73                                 | 6.68           |
| Propionyl carnitine            | Carnitines  | HMDB0000824 | C03017 | 8.27                                 | 8.90           |
| Stearyl carnitine              | Carnitines  | HMDB0000848 | NA     | 20.80                                | 20.19          |
| 10Z-Heptadecenoic acid         | Fatty acids | HMDB0060038 | NA     | 29.62                                | 28.46          |
| 12-Hydroxystearic acid         | Fatty acids | HMDB0061706 | NA     | 5.12                                 | 5.03           |
| 2-Hydroxy-3-methylbutyric acid | Fatty acids | HMDB0000407 | NA     | 27.69                                | 29.48          |
| 2,2-Dimethyladipic acid        | Fatty acids | NA          | NA     | 8.74                                 | 8.61           |
| 3-Methyladipic acid            | Fatty acids | HMDB0000555 | NA     | 28.86                                | 28.99          |
| 5-Dodecenoic acid              | Fatty acids | HMDB0000529 | NA     | 5.98                                 | 6.15           |
| 8,11,14-Eicosatrienoic acid    | Fatty acids | HMDB0002925 | C03242 | 13.51                                | 13.25          |
| Adrenic acid                   | Fatty acids | HMDB0002226 | C16527 | 28.95                                | 28.54          |
| alpha-Linolenic acid           | Fatty acids | HMDB0001388 | C06427 | 8.66                                 | 11.15          |
| Arachidonic acid               | Fatty acids | HMDB0001043 | C00219 | 9.15                                 | 9.32           |
| Decanoic acid                  | Fatty acids | HMDB0000511 | C01571 | 12.16                                | 11.48          |
| DHA                            | Fatty acids | HMDB0002183 | C06429 | 14.54                                | 16.37          |
| Dodecanoic acid                | Fatty acids | HMDB0000638 | C02679 | 8.40                                 | 8.15           |
| DPA <sub>n</sub> -3            | Fatty acids | HMDB0006528 | C16513 | 16.85                                | 17.53          |

| Metabolites                  | Classes       | HMDB        | KEGG   | CV of pooled QC samples <sup>a</sup> |                |
|------------------------------|---------------|-------------|--------|--------------------------------------|----------------|
|                              |               |             |        | Average intra-batch CV               | Inter-batch CV |
| DPAn-6                       | Fatty acids   | HMDB0001976 | NA     | 23.94                                | 23.94          |
| EPA                          | Fatty acids   | HMDB0001999 | C06428 | 11.05                                | 11.84          |
| gamma-Linolenic acid         | Fatty acids   | HMDB0003073 | C06426 | 9.52                                 | 9.06           |
| Heptadecanoic acid           | Fatty acids   | HMDB0002259 | NA     | 27.21                                | 29.36          |
| Heptanoic acid               | Fatty acids   | HMDB0000666 | C17714 | 10.67                                | 11.34          |
| Linoleic acid                | Fatty acids   | HMDB0000673 | C01595 | 5.71                                 | 5.81           |
| Methylglutaric acid          | Fatty acids   | HMDB0000752 | NA     | 18.23                                | 20.79          |
| Methylmalonic acid           | Fatty acids   | HMDB0000202 | C02170 | 8.71                                 | 8.75           |
| Myristelaidic acid           | Fatty acids   | HMDB0062248 | NA     | 9.06                                 | 10.26          |
| Myristic acid                | Fatty acids   | HMDB0000806 | C06424 | 14.65                                | 15.30          |
| Myristoleic acid             | Fatty acids   | HMDB0002000 | C08322 | 7.06                                 | 8.66           |
| Nonanoic acid                | Fatty acids   | HMDB0000847 | C01601 | 28.81                                | 27.93          |
| Octanoic acid                | Fatty acids   | HMDB0000482 | C06423 | 7.07                                 | 7.22           |
| Oleic acid                   | Fatty acids   | HMDB0000207 | C00712 | 15.47                                | 15.90          |
| Palmitic acid                | Fatty acids   | HMDB0000220 | C00249 | 13.63                                | 13.11          |
| Palmitoleic acid             | Fatty acids   | HMDB0003229 | C08362 | 15.78                                | 16.16          |
| Pentadecanoic acid           | Fatty acids   | HMDB0000826 | C16537 | 20.04                                | 19.30          |
| Ricinoleic acid              | Fatty acids   | HMDB0034297 | C08365 | 7.55                                 | 8.66           |
| Undecylenic acid             | Fatty acids   | HMDB0033724 | C13910 | 6.69                                 | 6.55           |
| 3-Indolepropionic acid       | Indoles       | HMDB0002302 | NA     | 6.60                                 | 6.61           |
| Indoleacetic acid            | Indoles       | HMDB0000197 | C00954 | 9.02                                 | 8.93           |
| AMP                          | Nucleotides   | HMDB0000045 | C00020 | 10.93                                | 10.40          |
| 2-Furoic acid                | Organic acids | HMDB0000617 | C01546 | 24.84                                | 25.19          |
| 2-Hydroxybutyric acid        | Organic acids | HMDB0000008 | C05984 | 6.34                                 | 7.03           |
| 3-Hydroxybutyric acid        | Organic acids | HMDB0000357 | C01089 | 8.14                                 | 8.70           |
| 3-Methyl-2-oxovaleric acid   | Organic acids | HMDB0000491 | C03465 | 4.92                                 | 5.09           |
| Aconitic acid                | Organic acids | HMDB0000958 | C02341 | 8.46                                 | 8.59           |
| Adipic acid                  | Organic acids | HMDB0000448 | C06104 | 24.46                                | 22.72          |
| alpha-Hydroxyisobutyric acid | Organic acids | HMDB0000729 | NA     | 13.86                                | 13.50          |

| Metabolites                     | Classes               | HMDB        | KEGG   | CV of pooled QC samples <sup>a</sup> |                |
|---------------------------------|-----------------------|-------------|--------|--------------------------------------|----------------|
|                                 |                       |             |        | Average intra-batch CV               | Inter-batch CV |
| alpha-Ketoisovaleric acid       | Organic acids         | HMDB0000019 | C00141 | 8.83                                 | 8.46           |
| Azelaic acid                    | Organic acids         | HMDB0000784 | C08261 | 10.42                                | 10.59          |
| Benzoic acid                    | Organic acids         | HMDB0001870 | C00180 | 6.11                                 | 6.98           |
| Citramalic acid                 | Organic acids         | HMDB0000426 | C00815 | 8.72                                 | 8.94           |
| Citric acid                     | Organic acids         | HMDB0000094 | C00158 | 2.64                                 | 2.47           |
| Erythronic acid                 | Organic acids         | HMDB0000613 | NA     | 5.78                                 | 5.69           |
| Fumaric acid                    | Organic acids         | HMDB0000134 | C00122 | 25.87                                | 25.82          |
| Glutaric acid                   | Organic acids         | HMDB0000661 | C00489 | 18.19                                | 20.51          |
| Glycolic acid                   | Organic acids         | HMDB0000115 | C00160 | 8.96                                 | 8.51           |
| Guanidoacetic acid              | Organic acids         | HMDB0000128 | C00581 | 10.34                                | 10.32          |
| Isocitric acid                  | Organic acids         | HMDB0000193 | C00311 | 7.54                                 | 7.38           |
| Ketoleucine                     | Organic acids         | HMDB0000695 | C00233 | 4.19                                 | 4.11           |
| Lactic acid                     | Organic acids         | HMDB0000190 | C00186 | 4.04                                 | 3.91           |
| Maleic acid                     | Organic acids         | HMDB0000176 | C01384 | 23.45                                | 25.32          |
| Malic acid                      | Organic acids         | HMDB0000156 | C00149 | 8.44                                 | 8.43           |
| Malonic acid                    | Organic acids         | HMDB0000691 | C00383 | 26.46                                | 25.63          |
| Methylsuccinic acid             | Organic acids         | HMDB0001844 | NA     | 17.58                                | 16.93          |
| Oxalic acid                     | Organic acids         | HMDB0002329 | C00209 | 7.60                                 | 9.38           |
| Oxoadipic acid                  | Organic acids         | HMDB0000225 | C00322 | 28.05                                | 29.04          |
| Oxoglutaric acid                | Organic acids         | HMDB0000208 | C00026 | 9.09                                 | 8.54           |
| Petroselinic acid               | Organic acids         | HMDB0002080 | C08363 | 13.68                                | 14.35          |
| Pimelic acid                    | Organic acids         | HMDB0000857 | C02656 | 25.52                                | 27.61          |
| Pyruvic acid                    | Organic acids         | HMDB0000243 | C00022 | 11.97                                | 11.15          |
| Succinic acid                   | Organic acids         | HMDB0000254 | C00042 | 8.15                                 | 8.33           |
| 4-Hydroxyphenylpyruvic acid     | Phenols               | HMDB0000707 | C01179 | 15.17                                | 14.83          |
| Homovanillic acid               | Phenols               | HMDB0000118 | C05582 | 9.38                                 | 9.43           |
| p-Hydroxyphenylacetic acid      | Phenols               | HMDB0000020 | C00642 | 23.62                                | 26.31          |
| 2-Phenylpropionate              | Phenylpropanoic acids | HMDB0011743 | NA     | 6.03                                 | 5.82           |
| 3-Hydroxyphenylhydracrylic acid | Phenylpropanoic acids | HMDB0002643 | NA     | 16.45                                | 17.77          |

| Metabolites              | Classes               | HMDB        | KEGG   | CV of pooled QC samples <sup>a</sup> |                |
|--------------------------|-----------------------|-------------|--------|--------------------------------------|----------------|
|                          |                       |             |        | Average intra-batch CV               | Inter-batch CV |
| Hydrocinnamic acid       | Phenylpropanoic acids | HMDB0000764 | C05629 | 12.00                                | 11.14          |
| Hydroxyphenyllactic acid | Phenylpropanoic acids | HMDB0000755 | C03672 | 11.69                                | 11.21          |
| Phenyllactic acid        | Phenylpropanoic acids | HMDB0000779 | C01479 | 17.97                                | 17.59          |
| N-Methylnicotinamide     | Pyridines             | HMDB0003152 | NA     | 10.21                                | 9.92           |
| 3-Hydroxyisovaleric acid | SCFAs                 | HMDB0000754 | NA     | 12.83                                | 13.94          |
| Acetic acid              | SCFAs                 | HMDB0000042 | C00033 | 8.42                                 | 8.45           |
| Butyric acid             | SCFAs                 | HMDB0000039 | C00246 | 12.05                                | 11.61          |
| Caproic acid             | SCFAs                 | HMDB0000535 | C01585 | 7.19                                 | 6.81           |
| Ethylmethylacetic acid   | SCFAs                 | HMDB0002176 | C18319 | 7.62                                 | 8.02           |
| Formic acid              | SCFAs                 | HMDB0000142 | C00058 | 15.91                                | 15.73          |
| Isobutyric acid          | SCFAs                 | HMDB0001873 | C02632 | 15.54                                | 17.16          |
| Isocaproic acid          | SCFAs                 | HMDB0000689 | NA     | 17.25                                | 20.51          |
| Isovaleric acid          | SCFAs                 | HMDB0000718 | C08262 | 8.87                                 | 8.47           |
| Pentanoic acid           | SCFAs                 | HMDB0000892 | C00803 | 15.47                                | 14.96          |
| Propanoic acid           | SCFAs                 | HMDB0000237 | C00163 | 10.52                                | 10.57          |

<sup>a</sup> CV: coefficient of variation; QC: quality control.



Supplementary Table ST2 Distributions and comparisons of plasma metabolite concentrations ( $\mu\text{mol/L}$ ) in cases and controls

| Metabolites             | Classes     | Cases          |              | Controls       |              | Ratio of Geometric means (95% CI) |
|-------------------------|-------------|----------------|--------------|----------------|--------------|-----------------------------------|
|                         |             | Geometric mean | Geometric SD | Geometric mean | Geometric SD |                                   |
| 2-Hydroxyglutaric acid  | Amino acids | 0.525          | 1.864        | 0.466          | 1.971        | 1.13 (0.84, 1.51)                 |
| 2-Phenylglycine         | Amino acids | 0.243          | 1.748        | 0.255          | 1.472        | 0.95 (0.74, 1.22)                 |
| 5-Aminolevulinic acid   | Amino acids | 1.946          | 1.589        | 2.061          | 1.515        | 0.94 (0.74, 1.20)                 |
| Alanine                 | Amino acids | 483.553        | 1.242        | 494.79         | 1.242        | 0.98 (0.81, 1.18)                 |
| Arginine                | Amino acids | 106.483        | 1.346        | 101.648        | 1.424        | 1.05 (0.85, 1.30)                 |
| Asparagine              | Amino acids | 75.799         | 1.322        | 70.495         | 1.254        | 1.08 (0.88, 1.31)                 |
| Aspartic acid           | Amino acids | 6.465          | 1.452        | 6.325          | 1.404        | 1.02 (0.82, 1.27)                 |
| Citrulline              | Amino acids | 58.188         | 1.357        | 51.559         | 1.389        | 1.13 (0.91, 1.40)                 |
| Creatine                | Amino acids | 27.818         | 1.606        | 35.892         | 1.522        | 0.78 (0.61, 0.99)                 |
| Dimethylglycine         | Amino acids | 8.273          | 1.404        | 6.994          | 1.336        | 1.18 (0.96, 1.46)                 |
| GABA                    | Amino acids | 0.348          | 1.388        | 0.329          | 1.435        | 1.06 (0.85, 1.32)                 |
| Glutamic acid           | Amino acids | 23.923         | 1.479        | 23.573         | 1.383        | 1.01 (0.81, 1.27)                 |
| Glutamine               | Amino acids | 1355.254       | 1.598        | 1424.88        | 1.183        | 0.95 (0.77, 1.18)                 |
| Glycine                 | Amino acids | 296.077        | 1.276        | 293.465        | 1.28         | 1.01 (0.83, 1.23)                 |
| Hippuric acid           | Amino acids | 1.686          | 2.795        | 1.702          | 2.962        | 0.99 (0.64, 1.55)                 |
| Histidine               | Amino acids | 88.517         | 1.204        | 84.043         | 1.178        | 1.05 (0.88, 1.27)                 |
| Homoserine              | Amino acids | 16.081         | 1.359        | 14.43          | 1.358        | 1.11 (0.90, 1.37)                 |
| Isoleucine              | Amino acids | 61.281         | 1.422        | 65.023         | 1.413        | 0.94 (0.76, 1.17)                 |
| Leucine                 | Amino acids | 169.412        | 1.33         | 181.903        | 1.302        | 0.93 (0.76, 1.14)                 |
| Lysine                  | Amino acids | 364.986        | 1.27         | 387.926        | 1.25         | 0.94 (0.77, 1.14)                 |
| Methionine              | Amino acids | 38.058         | 1.377        | 32.008         | 1.309        | 1.19 (0.97, 1.46)                 |
| Methylcysteine          | Amino acids | 7.764          | 1.555        | 8.086          | 1.541        | 0.96 (0.76, 1.22)                 |
| N-Acetylglycine         | Amino acids | 6.769          | 1.255        | 7.244          | 1.276        | 0.93 (0.77, 1.14)                 |
| N-Acetylserine          | Amino acids | 2.927          | 1.24         | 2.842          | 1.219        | 1.03 (0.85, 1.25)                 |
| N-Phenylacetylglutamine | Amino acids | 1.877          | 2.328        | 1.835          | 2.407        | 1.02 (0.71, 1.48)                 |
| Norvaline               | Amino acids | 36.161         | 1.078        | 36.094         | 1.076        | 1.00 (0.85, 1.18)                 |
| Ornithine               | Amino acids | 149.868        | 1.399        | 139.791        | 1.35         | 1.07 (0.87, 1.33)                 |
| Phenylalanine           | Amino acids | 68.33          | 1.291        | 62.718         | 1.184        | 1.09 (0.90, 1.32)                 |

| Metabolites                    | Classes       | Cases          |              | Controls       |              | Ratio of Geometric means (95% CI) |
|--------------------------------|---------------|----------------|--------------|----------------|--------------|-----------------------------------|
|                                |               | Geometric mean | Geometric SD | Geometric mean | Geometric SD |                                   |
| Pipecolic acid                 | Amino acids   | 4.563          | 1.533        | 4.075          | 1.476        | 1.12 (0.89, 1.41)                 |
| Proline                        | Amino acids   | 244.646        | 1.3          | 239.932        | 1.382        | 1.02 (0.83, 1.25)                 |
| Pyroglutamic acid              | Amino acids   | 22.886         | 1.504        | 21.965         | 1.395        | 1.04 (0.83, 1.30)                 |
| Sarcosine                      | Amino acids   | 14.999         | 1.334        | 14.555         | 1.278        | 1.03 (0.84, 1.26)                 |
| Selenomethionine               | Amino acids   | 92.706         | 1.405        | 91.315         | 1.393        | 1.02 (0.82, 1.26)                 |
| Serine                         | Amino acids   | 145.564        | 1.311        | 133.501        | 1.259        | 1.09 (0.89, 1.33)                 |
| Threonine                      | Amino acids   | 122.002        | 1.304        | 111.069        | 1.265        | 1.10 (0.90, 1.34)                 |
| Tryptophan                     | Amino acids   | 119.51         | 1.245        | 112.503        | 1.227        | 1.06 (0.88, 1.29)                 |
| Tyrosine                       | Amino acids   | 115.713        | 1.38         | 89.015         | 1.267        | 1.30 (1.06, 1.60)                 |
| Valine                         | Amino acids   | 210.806        | 1.236        | 219.813        | 1.221        | 0.96 (0.79, 1.16)                 |
| alpha-Aminobutyric acid        | Amino acids   | 4.618          | 1.344        | 4.767          | 1.3          | 0.97 (0.79, 1.19)                 |
| beta-Alanine                   | Amino acids   | 3.337          | 2.44         | 3.446          | 2.09         | 0.97 (0.68, 1.38)                 |
| Phenylacetic acid              | Benzenoids    | 6.482          | 2.383        | 4.843          | 2.488        | 1.34 (0.92, 1.95)                 |
| Phenylpyruvic acid             | Benzenoids    | 0.361          | 1.949        | 0.317          | 1.729        | 1.14 (0.86, 1.51)                 |
| ortho-Hydroxyphenylacetic acid | Benzenoids    | 0.229          | 1.588        | 0.245          | 1.529        | 0.93 (0.73, 1.19)                 |
| 4-Hydroxybenzoic acid          | Benzoic acids | 0.177          | 1.282        | 0.171          | 1.241        | 1.03 (0.85, 1.25)                 |
| Phthalic acid                  | Benzoic acids | 0.724          | 1.461        | 0.757          | 1.427        | 0.96 (0.77, 1.20)                 |
| m-Aminobenzoic acid            | Benzoic acids | 4.248          | 1.775        | 4.423          | 1.703        | 0.96 (0.73, 1.26)                 |
| m-Hydroxyhippuric acid         | Benzoic acids | 0.107          | 1.387        | 0.108          | 1.428        | 0.99 (0.80, 1.23)                 |
| 7-DHCA                         | Bile acids    | 0.062          | 2.052        | 0.058          | 1.94         | 1.07 (0.79, 1.46)                 |
| CA                             | Bile acids    | 0.056          | 3.146        | 0.042          | 3.161        | 1.33 (0.82, 2.17)                 |
| CDCA                           | Bile acids    | 0.8            | 3.272        | 0.625          | 3.596        | 1.28 (0.75, 2.18)                 |
| DCA                            | Bile acids    | 0.455          | 2.404        | 0.483          | 2.542        | 0.94 (0.64, 1.38)                 |
| GCA                            | Bile acids    | 1.746          | 3.81         | 0.534          | 3            | 3.27 (1.93, 5.56)                 |
| GCDCA                          | Bile acids    | 9.771          | 3.009        | 3.679          | 2.281        | 2.66 (1.76, 4.01)                 |
| GDCA                           | Bile acids    | 0.793          | 7.788        | 0.472          | 6.34         | 1.68 (0.56, 5.02)                 |
| GHCA                           | Bile acids    | 0.068          | 2.269        | 0.044          | 1.737        | 1.57 (1.15, 2.14)                 |
| GLCA                           | Bile acids    | 0.224          | 1.865        | 0.196          | 1.624        | 1.14 (0.87, 1.50)                 |
| GLCA-3S                        | Bile acids    | 0.477          | 3.381        | 0.358          | 3.339        | 1.33 (0.79, 2.24)                 |

| Metabolites                   | Classes       | Cases          |              | Controls       |              | Ratio of Geometric means (95% CI) |
|-------------------------------|---------------|----------------|--------------|----------------|--------------|-----------------------------------|
|                               |               | Geometric mean | Geometric SD | Geometric mean | Geometric SD |                                   |
| GDCA                          | Bile acids    | 0.668          | 3.132        | 0.432          | 2.62         | 1.54 (0.99, 2.41)                 |
| HCA                           | Bile acids    | 0.155          | 1.496        | 0.134          | 1.319        | 1.16 (0.93, 1.44)                 |
| HDCA                          | Bile acids    | 0.159          | 2.1          | 0.168          | 2.444        | 0.94 (0.66, 1.34)                 |
| LCA                           | Bile acids    | 0.034          | 2.086        | 0.029          | 1.677        | 1.19 (0.89, 1.59)                 |
| TCA                           | Bile acids    | 0.193          | 5.22         | 0.042          | 3.167        | 4.63 (2.38, 9.02)                 |
| TCDCA                         | Bile acids    | 1.023          | 4.626        | 0.215          | 2.811        | 4.75 (2.63, 8.58)                 |
| TDCA                          | Bile acids    | 0.218          | 3.278        | 0.102          | 2.383        | 2.13 (1.37, 3.31)                 |
| UCA                           | Bile acids    | 0.096          | 1.401        | 0.093          | 1.372        | 1.04 (0.84, 1.29)                 |
| apoCA                         | Bile acids    | 0.736          | 1.33         | 0.76           | 1.349        | 0.97 (0.79, 1.19)                 |
| beta-HDCA                     | Bile acids    | 0.128          | 3.422        | 0.125          | 2.988        | 1.03 (0.62, 1.68)                 |
| D-Xylulose                    | Carbohydrates | 1.839          | 1.398        | 1.611          | 1.297        | 1.14 (0.93, 1.41)                 |
| Fructose                      | Carbohydrates | 0.548          | 2.64         | 0.435          | 2.156        | 1.26 (0.87, 1.83)                 |
| Galactonic acid               | Carbohydrates | 0.196          | 1.694        | 0.188          | 1.544        | 1.04 (0.81, 1.34)                 |
| Gluconolactone                | Carbohydrates | 4.291          | 1.459        | 4.272          | 1.398        | 1.00 (0.81, 1.25)                 |
| Glucose                       | Carbohydrates | 8054.545       | 1.446        | 7385.193       | 1.357        | 1.09 (0.88, 1.35)                 |
| Glutaconic acid               | Carbohydrates | 6.53           | 1.56         | 6.571          | 1.502        | 0.99 (0.78, 1.26)                 |
| Glyceric acid                 | Carbohydrates | 5.885          | 1.632        | 5.805          | 1.599        | 1.01 (0.79, 1.30)                 |
| Maltose/Lactose               | Carbohydrates | 2.159          | 2.018        | 2.455          | 1.905        | 0.88 (0.65, 1.19)                 |
| N-Acetylneuraminic acid       | Carbohydrates | 1.016          | 1.305        | 1.081          | 1.268        | 0.94 (0.77, 1.15)                 |
| Rhamnose                      | Carbohydrates | 2.407          | 1.959        | 1.639          | 2.182        | 1.47 (1.07, 2.02)                 |
| Tartaric acid                 | Carbohydrates | 0.828          | 1.759        | 0.856          | 1.915        | 0.97 (0.73, 1.29)                 |
| Threonic acid                 | Carbohydrates | 2.401          | 1.964        | 2.591          | 1.779        | 0.93 (0.69, 1.24)                 |
| Trehalose                     | Carbohydrates | 12.846         | 1.103        | 13.112         | 1.081        | 0.98 (0.83, 1.16)                 |
| Xylose                        | Carbohydrates | 4.364          | 1.582        | 4.048          | 1.622        | 1.08 (0.84, 1.38)                 |
| 2-Methylbutyrylcarnitine      | Carnitines    | 0.053          | 1.524        | 0.054          | 1.472        | 0.99 (0.79, 1.25)                 |
| 3-Hydroxyisovaleryl carnitine | Carnitines    | 0.082          | 1.456        | 0.088          | 1.341        | 0.93 (0.75, 1.16)                 |
| Acetylcarnitine               | Carnitines    | 6.062          | 1.496        | 5.728          | 1.397        | 1.06 (0.85, 1.32)                 |
| Adipoylcarnitine              | Carnitines    | 0.028          | 1.374        | 0.027          | 1.418        | 1.05 (0.85, 1.31)                 |
| Carnitine                     | Carnitines    | 28.373         | 1.233        | 27.561         | 1.222        | 1.03 (0.85, 1.24)                 |

| Metabolites                    | Classes     | Cases          |              | Controls       |              | Ratio of Geometric means (95% CI) |
|--------------------------------|-------------|----------------|--------------|----------------|--------------|-----------------------------------|
|                                |             | Geometric mean | Geometric SD | Geometric mean | Geometric SD |                                   |
| Decanoylcarnitine              | Carnitines  | 0.187          | 1.881        | 0.181          | 1.802        | 1.03 (0.77, 1.37)                 |
| Glutarylcarnitine              | Carnitines  | 0.087          | 1.258        | 0.083          | 1.235        | 1.05 (0.87, 1.27)                 |
| Hexanoylcarnitine              | Carnitines  | 0.035          | 2.352        | 0.034          | 2.1          | 1.00 (0.71, 1.42)                 |
| Isovelarylcarnitine            | Carnitines  | 0.068          | 1.548        | 0.072          | 1.506        | 0.94 (0.75, 1.19)                 |
| Lauroylcarnitine               | Carnitines  | 0.078          | 2.17         | 0.07           | 2.389        | 1.12 (0.79, 1.60)                 |
| Linoleylcarnitine              | Carnitines  | 0.298          | 1.574        | 0.289          | 1.548        | 1.03 (0.81, 1.31)                 |
| Malonylcarnitine               | Carnitines  | 0.162          | 2.723        | 0.168          | 2.285        | 0.96 (0.65, 1.42)                 |
| Myristoylcarnitine             | Carnitines  | 0.066          | 1.393        | 0.059          | 1.504        | 1.12 (0.90, 1.40)                 |
| Octanoylcarnitine              | Carnitines  | 0.069          | 1.875        | 0.067          | 1.782        | 1.04 (0.78, 1.38)                 |
| Oleylcarnitine                 | Carnitines  | 0.157          | 1.535        | 0.142          | 1.602        | 1.11 (0.87, 1.41)                 |
| Palmitoylcarnitine             | Carnitines  | 0.17           | 1.471        | 0.159          | 1.537        | 1.07 (0.85, 1.35)                 |
| Propionylcarnitine             | Carnitines  | 0.802          | 1.394        | 0.79           | 1.362        | 1.01 (0.82, 1.26)                 |
| Stearylcarnitine               | Carnitines  | 0.19           | 1.66         | 0.17           | 1.829        | 1.12 (0.85, 1.47)                 |
| 10Z-Heptadecenoic acid         | Fatty acids | 0.105          | 2.514        | 0.092          | 2.472        | 1.15 (0.78, 1.69)                 |
| 12-Hydroxystearic acid         | Fatty acids | 0.306          | 1.3          | 0.321          | 1.351        | 0.95 (0.78, 1.17)                 |
| 2,2-Dimethyladipic acid        | Fatty acids | 0.491          | 3.959        | 0.523          | 3.881        | 0.94 (0.51, 1.72)                 |
| 2-Hydroxy-3-methylbutyric acid | Fatty acids | 29.129         | 1.972        | 25.024         | 1.784        | 1.16 (0.87, 1.56)                 |
| 3-Methyladipic acid            | Fatty acids | 0.482          | 3.008        | 0.517          | 3.499        | 0.93 (0.56, 1.54)                 |
| 5-Dodecenoic acid              | Fatty acids | 0.205          | 2.13         | 0.182          | 2.019        | 1.13 (0.82, 1.56)                 |
| 8,11,14-Eicosatrienoic acid    | Fatty acids | 0.297          | 2.15         | 0.32           | 1.777        | 0.93 (0.69, 1.26)                 |
| Adrenic acid                   | Fatty acids | 0.372          | 1.98         | 0.369          | 1.961        | 1.01 (0.74, 1.37)                 |
| Arachidonic acid               | Fatty acids | 1.533          | 1.772        | 1.857          | 1.528        | 0.83 (0.64, 1.07)                 |
| DHA                            | Fatty acids | 1.593          | 2.105        | 1.788          | 1.784        | 0.89 (0.66, 1.20)                 |
| DPA <sub>n</sub> -3            | Fatty acids | 0.296          | 2.156        | 0.327          | 1.789        | 0.91 (0.67, 1.23)                 |
| DPA <sub>n</sub> -6            | Fatty acids | 0.209          | 2.383        | 0.227          | 1.876        | 0.92 (0.66, 1.28)                 |
| Decanoic acid                  | Fatty acids | 1.135          | 2.511        | 0.917          | 2.374        | 1.24 (0.85, 1.80)                 |
| Dodecanoic acid                | Fatty acids | 0.545          | 3.227        | 0.536          | 2.808        | 1.02 (0.64, 1.62)                 |
| EPA                            | Fatty acids | 0.304          | 2.496        | 0.373          | 2.314        | 0.82 (0.56, 1.18)                 |
| Heptadecanoic acid             | Fatty acids | 0.574          | 1.649        | 0.613          | 1.53         | 0.94 (0.73, 1.20)                 |

| Metabolites                | Classes       | Cases          |              | Controls       |              | Ratio of Geometric means (95% CI) |
|----------------------------|---------------|----------------|--------------|----------------|--------------|-----------------------------------|
|                            |               | Geometric mean | Geometric SD | Geometric mean | Geometric SD |                                   |
| Heptanoic acid             | Fatty acids   | 14.953         | 1.324        | 15.064         | 1.36         | 0.99 (0.81, 1.22)                 |
| Linoleic acid              | Fatty acids   | 131.024        | 1.906        | 141.922        | 1.796        | 0.92 (0.69, 1.23)                 |
| Methylglutaric acid        | Fatty acids   | 0.475          | 1.73         | 0.461          | 1.693        | 1.03 (0.79, 1.34)                 |
| Methylmalonic acid         | Fatty acids   | 6.146          | 1.765        | 5.696          | 1.691        | 1.08 (0.83, 1.41)                 |
| Myristelaidic acid         | Fatty acids   | 0.209          | 3.112        | 0.174          | 5.009        | 1.20 (0.63, 2.29)                 |
| Myristic acid              | Fatty acids   | 5.677          | 1.486        | 5.51           | 1.462        | 1.03 (0.82, 1.29)                 |
| Myristoleic acid           | Fatty acids   | 0.121          | 2.255        | 0.105          | 2.031        | 1.16 (0.83, 1.61)                 |
| Nonanoic acid              | Fatty acids   | 0.783          | 2.668        | 0.768          | 2.774        | 1.02 (0.67, 1.55)                 |
| Octanoic acid              | Fatty acids   | 25.127         | 1.415        | 24.051         | 1.339        | 1.04 (0.84, 1.29)                 |
| Oleic acid                 | Fatty acids   | 58.751         | 2.036        | 60.075         | 1.921        | 0.98 (0.72, 1.33)                 |
| Palmitic acid              | Fatty acids   | 536.736        | 1.265        | 543.352        | 1.24         | 0.99 (0.81, 1.20)                 |
| Palmitoleic acid           | Fatty acids   | 5.638          | 2.589        | 4.734          | 2.46         | 1.19 (0.81, 1.76)                 |
| Pentadecanoic acid         | Fatty acids   | 0.299          | 1.659        | 0.295          | 1.54         | 1.01 (0.79, 1.30)                 |
| Ricinoleic acid            | Fatty acids   | 0.085          | 1.685        | 0.082          | 1.746        | 1.04 (0.80, 1.35)                 |
| Undecylenic acid           | Fatty acids   | 0.55           | 2.698        | 0.52           | 2.449        | 1.06 (0.71, 1.57)                 |
| alpha-Linolenic acid       | Fatty acids   | 6.661          | 2.47         | 7.308          | 2.308        | 0.91 (0.63, 1.32)                 |
| gamma-Linolenic acid       | Fatty acids   | 0.255          | 2.446        | 0.309          | 2.099        | 0.83 (0.58, 1.17)                 |
| 3-Indolepropionic acid     | Indoles       | 0.481          | 3.884        | 0.412          | 4.836        | 1.17 (0.59, 2.30)                 |
| Indoleacetic acid          | Indoles       | 1.817          | 2.194        | 1.88           | 2.123        | 0.97 (0.69, 1.35)                 |
| AMP                        | Nucleotides   | 241.836        | 3.423        | 362.214        | 2.942        | 0.67 (0.41, 1.09)                 |
| 2-Furoic acid              | Organic acids | 0.83           | 2.058        | 0.677          | 1.884        | 1.23 (0.90, 1.66)                 |
| 2-Hydroxybutyric acid      | Organic acids | 37.953         | 1.72         | 37.491         | 1.632        | 1.01 (0.78, 1.31)                 |
| 3-Hydroxybutyric acid      | Organic acids | 86.997         | 2.265        | 95.243         | 2.145        | 0.91 (0.65, 1.28)                 |
| 3-Methyl-2-oxovaleric acid | Organic acids | 36.443         | 1.354        | 38.324         | 1.325        | 0.95 (0.77, 1.17)                 |
| Aconitic acid              | Organic acids | 204.07         | 1.301        | 177.99         | 1.275        | 1.15 (0.94, 1.40)                 |
| Adipic acid                | Organic acids | 0.792          | 2.25         | 0.808          | 2.081        | 0.98 (0.70, 1.37)                 |
| Azelaic acid               | Organic acids | 0.332          | 1.669        | 0.334          | 1.662        | 0.99 (0.77, 1.28)                 |
| Benzoic acid               | Organic acids | 10.917         | 1.157        | 10.517         | 1.106        | 1.04 (0.87, 1.24)                 |
| Citramalic acid            | Organic acids | 0.504          | 1.694        | 0.465          | 1.737        | 1.08 (0.83, 1.41)                 |

| Metabolites                     | Classes               | Cases          |              | Controls       |              | Ratio of Geometric means (95% CI) |
|---------------------------------|-----------------------|----------------|--------------|----------------|--------------|-----------------------------------|
|                                 |                       | Geometric mean | Geometric SD | Geometric mean | Geometric SD |                                   |
| Citric acid                     | Organic acids         | 174.09         | 1.276        | 148.801        | 1.239        | 1.17 (0.96, 1.42)                 |
| Erythronic acid                 | Organic acids         | 2.821          | 1.689        | 2.967          | 1.572        | 0.95 (0.74, 1.22)                 |
| Fumaric acid                    | Organic acids         | 0.144          | 2.038        | 0.14           | 1.961        | 1.03 (0.75, 1.40)                 |
| Glutaric acid                   | Organic acids         | 0.506          | 6.374        | 0.289          | 6.331        | 1.75 (0.66, 4.67)                 |
| Glycolic acid                   | Organic acids         | 11.291         | 1.34         | 9.964          | 1.278        | 1.13 (0.93, 1.39)                 |
| Guanidoacetic acid              | Organic acids         | 5.402          | 1.394        | 5.068          | 1.292        | 1.07 (0.87, 1.31)                 |
| Isocitric acid                  | Organic acids         | 7.224          | 1.418        | 5.683          | 1.372        | 1.27 (1.02, 1.58)                 |
| Ketoleucine                     | Organic acids         | 68.527         | 1.386        | 73.339         | 1.337        | 0.93 (0.76, 1.15)                 |
| Lactic acid                     | Organic acids         | 2922.131       | 1.332        | 3093.084       | 1.33         | 0.94 (0.77, 1.16)                 |
| Maleic acid                     | Organic acids         | 1.201          | 1.847        | 1.2            | 1.679        | 1.00 (0.76, 1.31)                 |
| Malic acid                      | Organic acids         | 5.227          | 1.517        | 4.632          | 1.603        | 1.13 (0.89, 1.44)                 |
| Malonic acid                    | Organic acids         | 1.015          | 2.243        | 1.05           | 2.265        | 0.97 (0.68, 1.37)                 |
| Methylsuccinic acid             | Organic acids         | 0.902          | 3.282        | 0.526          | 4.38         | 1.71 (0.94, 3.12)                 |
| Oxalic acid                     | Organic acids         | 76.363         | 1.706        | 79.74          | 1.644        | 0.96 (0.74, 1.24)                 |
| Oxoadipic acid                  | Organic acids         | 0.195          | 1.811        | 0.168          | 1.813        | 1.16 (0.88, 1.54)                 |
| Oxoglutaric acid                | Organic acids         | 15.592         | 1.864        | 13.697         | 1.472        | 1.14 (0.88, 1.48)                 |
| Petroselinic acid               | Organic acids         | 1.074          | 1.943        | 1.086          | 1.844        | 0.99 (0.74, 1.32)                 |
| Pimelic acid                    | Organic acids         | 0.593          | 2.728        | 0.654          | 2.734        | 0.91 (0.60, 1.38)                 |
| Pyruvic acid                    | Organic acids         | 940.278        | 2.01         | 1047.463       | 1.663        | 0.90 (0.68, 1.19)                 |
| Succinic acid                   | Organic acids         | 6.467          | 1.528        | 6.034          | 1.456        | 1.07 (0.85, 1.35)                 |
| alpha-Hydroxyisobutyric acid    | Organic acids         | 1.224          | 2.328        | 1.288          | 1.985        | 0.95 (0.68, 1.33)                 |
| alpha-Ketoisovaleric acid       | Organic acids         | 11.345         | 1.606        | 12.279         | 1.252        | 0.92 (0.74, 1.15)                 |
| 4-Hydroxyphenylpyruvic acid     | Phenols               | 0.744          | 2.118        | 0.664          | 2.276        | 1.12 (0.80, 1.57)                 |
| Homovanillic acid               | Phenols               | 1.738          | 1.55         | 1.26           | 1.367        | 1.38 (1.10, 1.73)                 |
| p-Hydroxyphenylacetic acid      | Phenols               | 0.847          | 3.382        | 0.907          | 3.21         | 0.93 (0.56, 1.55)                 |
| 2-Phenylpropionate              | Phenylpropanoic acids | 0.145          | 2.952        | 0.109          | 3.051        | 1.34 (0.84, 2.13)                 |
| 3-Hydroxyphenylhydracrylic acid | Phenylpropanoic acids | 0.368          | 2.611        | 0.392          | 2.904        | 0.94 (0.61, 1.44)                 |
| Hydrocinnamic acid              | Phenylpropanoic acids | 0.504          | 2.704        | 0.39           | 3.01         | 1.29 (0.83, 2.01)                 |
| Hydroxyphenyllactic acid        | Phenylpropanoic acids | 1.719          | 1.686        | 1.238          | 1.483        | 1.39 (1.09, 1.77)                 |

| Metabolites              | Classes               | Cases          |              | Controls       |              | Ratio of Geometric means (95% CI) |
|--------------------------|-----------------------|----------------|--------------|----------------|--------------|-----------------------------------|
|                          |                       | Geometric mean | Geometric SD | Geometric mean | Geometric SD |                                   |
| Phenyllactic acid        | Phenylpropanoic acids | 0.409          | 1.894        | 0.329          | 1.68         | 1.24 (0.94, 1.64)                 |
| N-Methylnicotinamide     | Pyridines             | 6.755          | 2.255        | 5.027          | 2.426        | 1.34 (0.94, 1.93)                 |
| 3-Hydroxyisovaleric acid | SCFAs                 | 0.828          | 1.574        | 0.847          | 1.357        | 0.98 (0.78, 1.23)                 |
| Acetic acid              | SCFAs                 | 34.282         | 1.858        | 34.948         | 1.997        | 0.98 (0.73, 1.32)                 |
| Butyric acid             | SCFAs                 | 1.411          | 1.541        | 1.255          | 1.556        | 1.12 (0.89, 1.43)                 |
| Caproic acid             | SCFAs                 | 1.581          | 1.406        | 1.5            | 1.355        | 1.05 (0.85, 1.30)                 |
| Ethylmethylacetic acid   | SCFAs                 | 0.48           | 1.543        | 0.439          | 1.57         | 1.09 (0.86, 1.39)                 |
| Formic acid              | SCFAs                 | 46.623         | 1.489        | 42.475         | 1.499        | 1.10 (0.87, 1.38)                 |
| Isobutyric acid          | SCFAs                 | 1.611          | 1.474        | 1.52           | 1.355        | 1.06 (0.85, 1.32)                 |
| Isocaproic acid          | SCFAs                 | 1.294          | 1.494        | 1.326          | 1.545        | 0.98 (0.77, 1.23)                 |
| Isovaleric acid          | SCFAs                 | 0.483          | 2.118        | 0.444          | 1.703        | 1.09 (0.81, 1.47)                 |
| Pentanoic acid           | SCFAs                 | 0.502          | 1.671        | 0.474          | 1.788        | 1.06 (0.81, 1.38)                 |
| Propanoic acid           | SCFAs                 | 4.94           | 1.291        | 4.552          | 1.26         | 1.09 (0.89, 1.32)                 |

Supplementary Table ST3 Association between all quantitated metabolites and liver cancer risk (Model 1)<sup>a</sup>

| Metabolite              | Class       | Categorical analysis |                           |                           |                           |                                             |                                        | Continuous analysis             |                |         |                                      |         |
|-------------------------|-------------|----------------------|---------------------------|---------------------------|---------------------------|---------------------------------------------|----------------------------------------|---------------------------------|----------------|---------|--------------------------------------|---------|
|                         |             | Q1                   | OR <sub>Q2</sub> (95% CI) | OR <sub>Q3</sub> (95% CI) | OR <sub>Q4</sub> (95% CI) | <i>P</i> <sub>non-linear</sub> <sup>b</sup> | FDR <sub>non-linear</sub> <sup>b</sup> | OR <sub>doubling</sub> (95% CI) | <i>P</i> value | FDR     | <i>P</i> <sub>Bon</sub> <sup>c</sup> | S value |
| 2-Hydroxyglutaric acid  | Amino acids | Ref.                 | 1.16 (0.74, 1.80)         | 1.03 (0.64, 1.67)         | 1.37 (0.88, 2.14)         | 3.7E-01                                     | 5.2E-01                                | 1.28 (1.06, 1.55)               | 1.2E-02        | 2.6E-02 | 1.0E+00                              | 6.43    |
| 2-Phenylglycine         | Amino acids | Ref.                 | 0.63 (0.39, 1.02)         | 0.65 (0.41, 1.04)         | 0.63 (0.40, 0.99)         | 5.2E-02                                     | 2.0E-01                                | 0.85 (0.67, 1.09)               | 2.0E-01        | 2.8E-01 | 1.0E+00                              | 2.31    |
| 5-Aminolevulinic acid   | Amino acids | Ref.                 | 0.65 (0.42, 1.00)         | 0.84 (0.54, 1.31)         | 0.56 (0.34, 0.93)         | 1.9E-01                                     | 4.1E-01                                | 0.77 (0.58, 1.02)               | 6.4E-02        | 1.1E-01 | 1.0E+00                              | 3.97    |
| Alanine                 | Amino acids | Ref.                 | 0.93 (0.59, 1.45)         | 0.77 (0.49, 1.20)         | 0.80 (0.51, 1.27)         | 9.5E-01                                     | 9.8E-01                                | 0.70 (0.42, 1.17)               | 1.7E-01        | 2.5E-01 | 1.0E+00                              | 2.55    |
| alpha-Aminobutyric acid | Amino acids | Ref.                 | 0.94 (0.61, 1.43)         | 0.56 (0.36, 0.87)         | 0.76 (0.49, 1.18)         | 3.4E-02                                     | 1.7E-01                                | 0.76 (0.52, 1.11)               | 1.6E-01        | 2.3E-01 | 1.0E+00                              | 2.69    |
| Arginine                | Amino acids | Ref.                 | 1.66 (1.02, 2.69)         | 1.86 (1.12, 3.09)         | 1.79 (1.05, 3.07)         | 2.6E-01                                     | 4.8E-01                                | 1.45 (1.00, 2.12)               | 5.2E-02        | 9.4E-02 | 1.0E+00                              | 4.27    |
| Asparagine              | Amino acids | Ref.                 | 0.98 (0.60, 1.62)         | 1.27 (0.79, 2.04)         | 2.05 (1.27, 3.31)         | 8.7E-03                                     | 8.1E-02                                | 2.42 (1.51, 3.89)               | 2.6E-04        | 1.2E-03 | 4.8E-02                              | 11.92   |
| Aspartic acid           | Amino acids | Ref.                 | 0.83 (0.52, 1.31)         | 0.88 (0.55, 1.39)         | 0.94 (0.57, 1.54)         | 2.5E-01                                     | 4.8E-01                                | 1.16 (0.83, 1.64)               | 3.8E-01        | 4.9E-01 | 1.0E+00                              | 1.40    |
| beta-Alanine            | Amino acids | Ref.                 | 0.79 (0.49, 1.25)         | 1.11 (0.72, 1.72)         | 0.88 (0.55, 1.39)         | 1.1E-01                                     | 3.3E-01                                | 0.97 (0.85, 1.10)               | 6.1E-01        | 7.0E-01 | 1.0E+00                              | 0.71    |
| Citrulline              | Amino acids | Ref.                 | 1.25 (0.74, 2.12)         | 2.71 (1.65, 4.45)         | 3.12 (1.86, 5.22)         | 9.6E-01                                     | 9.8E-01                                | 2.62 (1.76, 3.92)               | 2.4E-06        | 1.8E-05 | 4.5E-04                              | 18.67   |
| Creatine                | Amino acids | Ref.                 | 0.42 (0.26, 0.65)         | 0.27 (0.17, 0.44)         | 0.23 (0.14, 0.38)         | 7.2E-03                                     | 7.9E-02                                | 0.41 (0.31, 0.54)               | 2.4E-10        | 3.4E-09 | 4.4E-08                              | 31.96   |
| Dimethylglycine         | Amino acids | Ref.                 | 1.71 (0.99, 2.96)         | 1.81 (1.05, 3.10)         | 4.57 (2.74, 7.64)         | 2.9E-01                                     | 4.8E-01                                | 3.38 (2.25, 5.07)               | 4.2E-09        | 4.9E-08 | 7.9E-07                              | 27.82   |
| GABA                    | Amino acids | Ref.                 | 0.68 (0.42, 1.10)         | 0.85 (0.52, 1.39)         | 1.57 (1.00, 2.45)         | 6.7E-01                                     | 7.7E-01                                | 1.43 (1.02, 2.01)               | 3.8E-02        | 7.5E-02 | 1.0E+00                              | 4.73    |
| Glutamic acid           | Amino acids | Ref.                 | 1.03 (0.65, 1.61)         | 0.76 (0.47, 1.24)         | 0.91 (0.57, 1.45)         | 7.3E-03                                     | 7.9E-02                                | 1.10 (0.79, 1.51)               | 5.7E-01        | 6.7E-01 | 1.0E+00                              | 0.80    |
| Glutamine               | Amino acids | Ref.                 | 0.47 (0.29, 0.75)         | 0.71 (0.45, 1.11)         | 1.02 (0.66, 1.56)         | 1.7E-06                                     | 1.1E-04                                | 0.71 (0.49, 1.05)               | 8.4E-02        | 1.4E-01 | 1.0E+00                              | 3.58    |
| Glycine                 | Amino acids | Ref.                 | 0.86 (0.55, 1.33)         | 0.98 (0.63, 1.53)         | 1.17 (0.77, 1.80)         | 9.5E-01                                     | 9.8E-01                                | 1.10 (0.72, 1.70)               | 6.5E-01        | 7.4E-01 | 1.0E+00                              | 0.62    |
| Hippuric acid           | Amino acids | Ref.                 | 1.30 (0.84, 2.02)         | 0.84 (0.53, 1.33)         | 1.03 (0.64, 1.64)         | 3.0E-01                                     | 4.8E-01                                | 0.99 (0.90, 1.10)               | 9.1E-01        | 9.2E-01 | 1.0E+00                              | 0.14    |
| Histidine               | Amino acids | Ref.                 | 1.43 (0.89, 2.30)         | 1.52 (0.94, 2.44)         | 1.90 (1.22, 2.96)         | 9.4E-01                                     | 9.8E-01                                | 3.06 (1.61, 5.80)               | 6.3E-04        | 2.6E-03 | 1.2E-01                              | 10.62   |
| Homoserine              | Amino acids | Ref.                 | 1.24 (0.78, 1.96)         | 1.75 (1.10, 2.79)         | 2.37 (1.46, 3.87)         | 8.6E-02                                     | 2.7E-01                                | 2.52 (1.67, 3.80)               | 1.1E-05        | 6.5E-05 | 2.0E-03                              | 16.54   |
| Isoleucine              | Amino acids | Ref.                 | 0.69 (0.44, 1.08)         | 0.83 (0.53, 1.30)         | 0.48 (0.29, 0.78)         | 7.6E-01                                     | 8.2E-01                                | 0.67 (0.47, 0.94)               | 2.0E-02        | 4.3E-02 | 1.0E+00                              | 5.63    |
| Leucine                 | Amino acids | Ref.                 | 0.64 (0.41, 1.00)         | 0.62 (0.39, 0.97)         | 0.51 (0.32, 0.81)         | 2.6E-01                                     | 4.8E-01                                | 0.53 (0.35, 0.79)               | 1.7E-03        | 5.5E-03 | 3.2E-01                              | 9.18    |
| Lysine                  | Amino acids | Ref.                 | 1.05 (0.69, 1.61)         | 0.47 (0.29, 0.76)         | 0.56 (0.35, 0.90)         | 6.8E-01                                     | 7.8E-01                                | 0.41 (0.24, 0.68)               | 6.1E-04        | 2.6E-03 | 1.1E-01                              | 10.68   |
| Methionine              | Amino acids | Ref.                 | 1.20 (0.69, 2.07)         | 1.77 (1.05, 2.98)         | 3.57 (2.17, 5.85)         | 2.8E-01                                     | 4.8E-01                                | 3.83 (2.50, 5.85)               | 5.5E-10        | 7.3E-09 | 1.0E-07                              | 30.76   |
| Methylcysteine          | Amino acids | Ref.                 | 0.92 (0.58, 1.44)         | 0.77 (0.48, 1.24)         | 0.81 (0.50, 1.32)         | 3.9E-01                                     | 5.4E-01                                | 0.84 (0.64, 1.10)               | 2.0E-01        | 2.8E-01 | 1.0E+00                              | 2.34    |
| N-Acetylglycine         | Amino acids | Ref.                 | 0.50 (0.32, 0.79)         | 0.51 (0.33, 0.78)         | 0.48 (0.31, 0.73)         | 1.5E-01                                     | 3.6E-01                                | 0.45 (0.28, 0.72)               | 8.2E-04        | 3.1E-03 | 1.5E-01                              | 10.24   |
| N-Acetylserine          | Amino acids | Ref.                 | 0.84 (0.54, 1.32)         | 0.87 (0.54, 1.39)         | 1.57 (0.98, 2.53)         | 2.1E-01                                     | 4.4E-01                                | 1.78 (1.00, 3.18)               | 5.0E-02        | 9.2E-02 | 1.0E+00                              | 4.32    |
| N-Phenylacetylglutamine | Amino acids | Ref.                 | 1.13 (0.71, 1.78)         | 1.05 (0.67, 1.65)         | 1.17 (0.75, 1.84)         | 5.9E-01                                     | 7.1E-01                                | 1.02 (0.90, 1.16)               | 7.3E-01        | 7.9E-01 | 1.0E+00                              | 0.46    |
| Norvaline               | Amino acids | Ref.                 | 0.78 (0.47, 1.30)         | 1.07 (0.63, 1.82)         | 1.10 (0.62, 1.98)         | 5.3E-01                                     | 6.5E-01                                | 1.54 (0.22, 10.82)              | 6.7E-01        | 7.5E-01 | 1.0E+00                              | 0.59    |



| Metabolite                     | Class         | Categorical analysis |                           |                           |                           |                           |                              | Continuous analysis             |           |         |                    |         |
|--------------------------------|---------------|----------------------|---------------------------|---------------------------|---------------------------|---------------------------|------------------------------|---------------------------------|-----------|---------|--------------------|---------|
|                                |               | Q1                   | OR <sub>Q2</sub> (95% CI) | OR <sub>Q3</sub> (95% CI) | OR <sub>Q4</sub> (95% CI) | $P_{\text{non-linear}}^b$ | FDR <sub>non-linear}^b</sub> | OR <sub>doubling</sub> (95% CI) | $P$ value | FDR     | $P_{\text{Bon}}^c$ | S value |
| Ornithine                      | Amino acids   | Ref.                 | 0.93 (0.58, 1.51)         | 1.42 (0.88, 2.30)         | 1.70 (1.06, 2.73)         | 4.3E-01                   | 5.7E-01                      | 1.69 (1.17, 2.44)               | 5.2E-03   | 1.4E-02 | 9.7E-01            | 7.59    |
| Phenylalanine                  | Amino acids   | Ref.                 | 1.12 (0.68, 1.85)         | 1.66 (1.00, 2.75)         | 3.27 (1.96, 5.43)         | 2.6E-02                   | 1.6E-01                      | 5.70 (2.88, 11.26)              | 5.5E-07   | 5.1E-06 | 1.0E-04            | 20.79   |
| Pipecolic acid                 | Amino acids   | Ref.                 | 1.69 (1.02, 2.79)         | 2.72 (1.62, 4.55)         | 2.93 (1.76, 4.88)         | 4.1E-02                   | 1.9E-01                      | 1.67 (1.25, 2.23)               | 5.5E-04   | 2.5E-03 | 1.0E-01            | 10.82   |
| Proline                        | Amino acids   | Ref.                 | 1.37 (0.88, 2.14)         | 1.68 (1.05, 2.69)         | 1.30 (0.81, 2.09)         | 1.4E-03                   | 2.7E-02                      | 1.18 (0.81, 1.73)               | 3.8E-01   | 4.9E-01 | 1.0E+00            | 1.38    |
| Pyroglutamic acid              | Amino acids   | Ref.                 | 1.23 (0.81, 1.88)         | 0.65 (0.40, 1.06)         | 1.21 (0.76, 1.91)         | 2.6E-02                   | 1.6E-01                      | 1.26 (0.93, 1.72)               | 1.4E-01   | 2.1E-01 | 1.0E+00            | 2.84    |
| Sarcosine                      | Amino acids   | Ref.                 | 0.75 (0.47, 1.20)         | 0.95 (0.61, 1.46)         | 1.44 (0.91, 2.27)         | 7.6E-03                   | 7.9E-02                      | 1.37 (0.90, 2.08)               | 1.5E-01   | 2.2E-01 | 1.0E+00            | 2.78    |
| Selenomethionine               | Amino acids   | Ref.                 | 1.13 (0.61, 2.12)         | 1.00 (0.51, 1.96)         | 1.33 (0.72, 2.44)         | 3.2E-01                   | 5.0E-01                      | 1.21 (0.76, 1.93)               | 4.1E-01   | 5.2E-01 | 1.0E+00            | 1.27    |
| Serine                         | Amino acids   | Ref.                 | 0.92 (0.57, 1.48)         | 1.30 (0.81, 2.11)         | 2.21 (1.43, 3.42)         | 8.5E-03                   | 8.1E-02                      | 2.56 (1.63, 4.01)               | 4.5E-05   | 2.6E-04 | 8.4E-03            | 14.44   |
| Threonine                      | Amino acids   | Ref.                 | 1.33 (0.82, 2.15)         | 1.43 (0.87, 2.35)         | 2.68 (1.66, 4.35)         | 1.5E-01                   | 3.6E-01                      | 3.12 (1.92, 5.07)               | 4.6E-06   | 3.2E-05 | 8.6E-04            | 17.72   |
| Tryptophan                     | Amino acids   | Ref.                 | 0.84 (0.50, 1.39)         | 1.51 (0.93, 2.45)         | 1.88 (1.20, 2.96)         | 2.6E-01                   | 4.8E-01                      | 2.71 (1.57, 4.67)               | 3.5E-04   | 1.6E-03 | 6.5E-02            | 11.49   |
| Tyrosine                       | Amino acids   | Ref.                 | 1.31 (0.65, 2.62)         | 2.54 (1.36, 4.74)         | 9.32 (4.98, 17.46)        | 6.0E-02                   | 2.2E-01                      | 13.42 (7.35, 24.49)             | 2.7E-17   | 1.8E-15 | 5.0E-15            | 55.04   |
| Valine                         | Amino acids   | Ref.                 | 0.91 (0.60, 1.39)         | 0.34 (0.20, 0.56)         | 0.67 (0.43, 1.04)         | 4.3E-01                   | 5.7E-01                      | 0.51 (0.30, 0.86)               | 1.2E-02   | 2.8E-02 | 1.0E+00            | 6.33    |
| ortho-Hydroxyphenylacetic acid | Benzenoids    | Ref.                 | 0.76 (0.49, 1.20)         | 0.59 (0.37, 0.95)         | 0.53 (0.32, 0.86)         | 5.8E-01                   | 7.0E-01                      | 0.74 (0.55, 0.98)               | 3.7E-02   | 7.4E-02 | 1.0E+00            | 4.77    |
| Phenylacetic acid              | Benzenoids    | Ref.                 | 1.86 (1.10, 3.16)         | 2.73 (1.67, 4.48)         | 2.91 (1.74, 4.89)         | 4.1E-01                   | 5.6E-01                      | 1.30 (1.14, 1.49)               | 6.9E-05   | 3.9E-04 | 1.3E-02            | 13.81   |
| Phenylpyruvic acid             | Benzenoids    | Ref.                 | 1.18 (0.75, 1.85)         | 1.25 (0.75, 2.07)         | 1.83 (1.13, 2.95)         | 1.6E-04                   | 4.3E-03                      | 1.29 (1.06, 1.58)               | 1.2E-02   | 2.6E-02 | 1.0E+00            | 6.42    |
| 4-Hydroxybenzoic acid          | Benzoic acids | Ref.                 | 0.56 (0.35, 0.91)         | 0.58 (0.36, 0.94)         | 1.17 (0.76, 1.80)         | 1.5E-01                   | 3.6E-01                      | 1.52 (0.94, 2.44)               | 8.5E-02   | 1.4E-01 | 1.0E+00            | 3.55    |
| m-Aminobenzoic acid            | Benzoic acids | Ref.                 | 1.09 (0.70, 1.69)         | 0.77 (0.47, 1.26)         | 0.84 (0.53, 1.33)         | 4.4E-01                   | 5.8E-01                      | 0.90 (0.73, 1.11)               | 3.3E-01   | 4.5E-01 | 1.0E+00            | 1.60    |
| m-Hydroxyhippuric acid         | Benzoic acids | Ref.                 | 0.86 (0.48, 1.52)         | 0.73 (0.44, 1.23)         | 0.97 (0.59, 1.58)         | 9.9E-01                   | 9.9E-01                      | 0.95 (0.68, 1.31)               | 7.3E-01   | 7.9E-01 | 1.0E+00            | 0.45    |
| Phthalic acid                  | Benzoic acids | Ref.                 | 0.84 (0.52, 1.35)         | 0.75 (0.46, 1.22)         | 0.66 (0.40, 1.08)         | 4.8E-01                   | 6.2E-01                      | 0.77 (0.56, 1.07)               | 1.2E-01   | 1.9E-01 | 1.0E+00            | 3.09    |
| 7-DHCA                         | Bile acids    | Ref.                 | 1.22 (0.65, 2.32)         | 1.67 (0.86, 3.26)         | 1.84 (1.02, 3.32)         | 3.1E-01                   | 5.0E-01                      | 1.19 (0.97, 1.46)               | 1.0E-01   | 1.7E-01 | 1.0E+00            | 3.25    |
| apoCA                          | Bile acids    | Ref.                 | 0.70 (0.42, 1.15)         | 0.91 (0.55, 1.49)         | 0.72 (0.43, 1.19)         | 9.9E-01                   | 9.9E-01                      | 0.73 (0.48, 1.10)               | 1.3E-01   | 2.0E-01 | 1.0E+00            | 2.96    |
| beta-HDCA                      | Bile acids    | Ref.                 | 0.98 (0.61, 1.57)         | 0.97 (0.60, 1.57)         | 1.21 (0.76, 1.91)         | 1.8E-01                   | 4.0E-01                      | 1.01 (0.92, 1.12)               | 7.8E-01   | 8.2E-01 | 1.0E+00            | 0.36    |
| CA                             | Bile acids    | Ref.                 | 2.24 (1.30, 3.87)         | 2.99 (1.68, 5.33)         | 2.76 (1.58, 4.82)         | 4.6E-02                   | 2.0E-01                      | 1.21 (1.08, 1.35)               | 7.6E-04   | 2.9E-03 | 1.4E-01            | 10.36   |
| CDCA                           | Bile acids    | Ref.                 | 1.30 (0.82, 2.07)         | 1.47 (0.92, 2.35)         | 1.91 (1.18, 3.09)         | 1.1E-01                   | 3.1E-01                      | 1.14 (1.03, 1.25)               | 8.0E-03   | 2.0E-02 | 1.0E+00            | 6.97    |
| DCA                            | Bile acids    | Ref.                 | 0.86 (0.56, 1.33)         | 0.95 (0.62, 1.47)         | 0.80 (0.51, 1.25)         | 5.0E-01                   | 6.4E-01                      | 0.95 (0.84, 1.07)               | 4.0E-01   | 5.0E-01 | 1.0E+00            | 1.33    |
| GCA                            | Bile acids    | Ref.                 | 2.48 (1.21, 5.10)         | 4.11 (1.95, 8.64)         | 13.00 (6.39, 26.45)       | 8.0E-01                   | 8.5E-01                      | 1.86 (1.61, 2.15)               | 3.9E-17   | 1.8E-15 | 7.2E-15            | 54.52   |
| GCDCA                          | Bile acids    | Ref.                 | 1.98 (0.93, 4.23)         | 5.16 (2.53, 10.53)        | 13.16 (6.50, 26.65)       | 4.4E-01                   | 5.8E-01                      | 2.15 (1.80, 2.56)               | 3.2E-17   | 1.8E-15 | 6.0E-15            | 54.79   |
| GDCA                           | Bile acids    | Ref.                 | 0.75 (0.45, 1.23)         | 1.12 (0.69, 1.82)         | 2.46 (1.55, 3.92)         | 1.8E-06                   | 1.1E-04                      | 1.11 (1.05, 1.19)               | 9.4E-04   | 3.4E-03 | 1.7E-01            | 10.06   |
| GHCA                           | Bile acids    | Ref.                 | 1.54 (0.79, 3.00)         | 3.23 (1.56, 6.68)         | 5.82 (3.01, 11.24)        | 5.1E-01                   | 6.4E-01                      | 2.52 (1.92, 3.31)               | 2.9E-11   | 4.5E-10 | 5.4E-09            | 35.01   |

| Metabolite                   | Class         | Categorical analysis |                           |                           |                           |                           |                              | Continuous analysis             |           |         |                    |         |
|------------------------------|---------------|----------------------|---------------------------|---------------------------|---------------------------|---------------------------|------------------------------|---------------------------------|-----------|---------|--------------------|---------|
|                              |               | Q1                   | OR <sub>Q2</sub> (95% CI) | OR <sub>Q3</sub> (95% CI) | OR <sub>Q4</sub> (95% CI) | $P_{\text{non-linear}}^b$ | FDR <sub>non-linear}^b</sub> | OR <sub>doubling</sub> (95% CI) | $P$ value | FDR     | $P_{\text{Bon}}^c$ | S value |
| GLCA                         | Bile acids    | Ref.                 | 1.09 (0.68, 1.76)         | 1.42 (0.85, 2.37)         | 1.53 (0.95, 2.47)         | 1.7E-01                   | 3.9E-01                      | 1.39 (1.12, 1.72)               | 2.4E-03   | 7.4E-03 | 4.5E-01            | 8.70    |
| GLCA-3S                      | Bile acids    | Ref.                 | 1.14 (0.71, 1.82)         | 1.28 (0.79, 2.06)         | 1.93 (1.22, 3.08)         | 1.4E-01                   | 3.6E-01                      | 1.19 (1.07, 1.31)               | 1.3E-03   | 4.3E-03 | 2.4E-01            | 9.61    |
| GUDCA                        | Bile acids    | Ref.                 | 1.35 (0.83, 2.22)         | 1.41 (0.85, 2.32)         | 2.57 (1.61, 4.11)         | 5.3E-02                   | 2.0E-01                      | 1.31 (1.18, 1.47)               | 1.3E-06   | 1.0E-05 | 2.5E-04            | 19.50   |
| HCA                          | Bile acids    | Ref.                 | 1.78 (0.97, 3.25)         | 1.87 (0.98, 3.57)         | 3.64 (2.02, 6.54)         | 4.8E-01                   | 6.2E-01                      | 3.02 (1.96, 4.64)               | 4.9E-07   | 4.8E-06 | 9.2E-05            | 20.95   |
| HDCA                         | Bile acids    | Ref.                 | 1.00 (0.64, 1.56)         | 0.82 (0.49, 1.37)         | 0.80 (0.50, 1.28)         | 4.3E-03                   | 6.1E-02                      | 0.94 (0.82, 1.07)               | 3.4E-01   | 4.5E-01 | 1.0E+00            | 1.56    |
| LCA                          | Bile acids    | Ref.                 | 1.09 (0.64, 1.84)         | 0.92 (0.50, 1.68)         | 2.17 (1.34, 3.54)         | 9.1E-05                   | 2.8E-03                      | 1.44 (1.17, 1.78)               | 5.8E-04   | 2.5E-03 | 1.1E-01            | 10.75   |
| TCA                          | Bile acids    | Ref.                 | 2.59 (1.14, 5.92)         | 3.56 (1.59, 7.98)         | 19.83 (8.96, 43.88)       | 2.9E-01                   | 4.8E-01                      | 1.92 (1.64, 2.24)               | 2.6E-16   | 9.8E-15 | 4.9E-14            | 51.75   |
| TCDCa                        | Bile acids    | Ref.                 | 2.58 (1.07, 6.20)         | 3.79 (1.66, 8.62)         | 23.38 (10.22, 53.49)      | 3.8E-01                   | 5.4E-01                      | 2.20 (1.84, 2.63)               | 5.7E-18   | 1.1E-15 | 1.1E-15            | 57.27   |
| TDCA                         | Bile acids    | Ref.                 | 1.63 (0.91, 2.93)         | 1.67 (0.91, 3.04)         | 6.11 (3.49, 10.68)        | 1.7E-01                   | 3.9E-01                      | 1.71 (1.48, 1.98)               | 5.1E-13   | 9.5E-12 | 9.5E-11            | 40.84   |
| UCA                          | Bile acids    | Ref.                 | 1.38 (0.71, 2.68)         | 1.54 (0.74, 3.22)         | 1.59 (0.80, 3.13)         | 1.7E-01                   | 3.9E-01                      | 1.36 (0.92, 1.99)               | 1.2E-01   | 1.9E-01 | 1.0E+00            | 3.06    |
| D-Xylulose                   | Carbohydrates | Ref.                 | 1.50 (0.89, 2.55)         | 1.78 (1.06, 2.98)         | 3.63 (2.12, 6.21)         | 6.0E-01                   | 7.1E-01                      | 3.69 (2.31, 5.91)               | 5.3E-08   | 5.8E-07 | 9.9E-06            | 24.16   |
| Fructose                     | Carbohydrates | Ref.                 | 1.15 (0.71, 1.87)         | 1.34 (0.81, 2.23)         | 1.87 (1.15, 3.06)         | 1.5E-01                   | 3.6E-01                      | 1.30 (1.12, 1.51)               | 5.1E-04   | 2.3E-03 | 9.4E-02            | 10.95   |
| Galactonic acid              | Carbohydrates | Ref.                 | 0.83 (0.50, 1.36)         | 0.88 (0.55, 1.38)         | 0.90 (0.57, 1.43)         | 2.0E-01                   | 4.2E-01                      | 1.15 (0.91, 1.46)               | 2.5E-01   | 3.5E-01 | 1.0E+00            | 1.99    |
| Gluconolactone               | Carbohydrates | Ref.                 | 0.60 (0.38, 0.93)         | 0.69 (0.44, 1.09)         | 0.94 (0.59, 1.50)         | 2.8E-02                   | 1.6E-01                      | 1.03 (0.74, 1.43)               | 8.6E-01   | 8.8E-01 | 1.0E+00            | 0.21    |
| Glucose                      | Carbohydrates | Ref.                 | 0.75 (0.45, 1.24)         | 0.97 (0.60, 1.56)         | 1.70 (1.11, 2.61)         | 7.4E-01                   | 8.1E-01                      | 1.68 (1.21, 2.34)               | 1.9E-03   | 6.1E-03 | 3.6E-01            | 9.00    |
| Glutaconic acid              | Carbohydrates | Ref.                 | 1.01 (0.61, 1.65)         | 1.01 (0.61, 1.68)         | 0.85 (0.52, 1.41)         | 2.6E-01                   | 4.8E-01                      | 0.97 (0.72, 1.30)               | 8.2E-01   | 8.5E-01 | 1.0E+00            | 0.28    |
| Glyceric acid                | Carbohydrates | Ref.                 | 0.84 (0.54, 1.31)         | 1.00 (0.64, 1.56)         | 1.03 (0.66, 1.63)         | 2.2E-01                   | 4.5E-01                      | 1.05 (0.83, 1.33)               | 7.0E-01   | 7.7E-01 | 1.0E+00            | 0.52    |
| Maltose/Lactose              | Carbohydrates | Ref.                 | 0.56 (0.35, 0.91)         | 0.71 (0.45, 1.13)         | 0.48 (0.29, 0.79)         | 4.4E-01                   | 5.8E-01                      | 0.78 (0.64, 0.94)               | 7.9E-03   | 2.0E-02 | 1.0E+00            | 6.99    |
| N-Acetylneuraminic acid      | Carbohydrates | Ref.                 | 0.64 (0.40, 1.03)         | 0.51 (0.32, 0.82)         | 0.43 (0.27, 0.70)         | 2.8E-03                   | 4.3E-02                      | 0.46 (0.29, 0.75)               | 1.5E-03   | 5.1E-03 | 2.9E-01            | 9.34    |
| Rhamnose                     | Carbohydrates | Ref.                 | 1.11 (0.63, 1.98)         | 1.98 (1.11, 3.53)         | 5.09 (2.91, 8.89)         | 3.0E-01                   | 4.8E-01                      | 2.05 (1.63, 2.58)               | 8.5E-10   | 1.1E-08 | 1.6E-07            | 30.13   |
| Tartaric acid                | Carbohydrates | Ref.                 | 0.81 (0.46, 1.42)         | 1.06 (0.60, 1.87)         | 0.98 (0.57, 1.70)         | 3.3E-01                   | 5.0E-01                      | 0.93 (0.78, 1.13)               | 4.7E-01   | 5.7E-01 | 1.0E+00            | 1.08    |
| Threonic acid                | Carbohydrates | Ref.                 | 0.69 (0.45, 1.06)         | 0.49 (0.31, 0.79)         | 0.89 (0.58, 1.37)         | 6.2E-02                   | 2.2E-01                      | 0.87 (0.74, 1.04)               | 1.3E-01   | 2.0E-01 | 1.0E+00            | 2.98    |
| Trehalose                    | Carbohydrates | Ref.                 | 0.68 (0.42, 1.08)         | 0.52 (0.31, 0.87)         | 0.41 (0.23, 0.74)         | 7.0E-01                   | 7.8E-01                      | 0.04 (0.01, 0.25)               | 6.7E-04   | 2.6E-03 | 1.2E-01            | 10.55   |
| Xylose                       | Carbohydrates | Ref.                 | 1.51 (0.93, 2.45)         | 1.91 (1.15, 3.17)         | 1.69 (1.03, 2.78)         | 2.9E-02                   | 1.6E-01                      | 1.32 (1.02, 1.69)               | 3.2E-02   | 6.7E-02 | 1.0E+00            | 4.96    |
| 2-Methylbutyrylcarnitine     | Carnitines    | Ref.                 | 1.04 (0.67, 1.62)         | 0.71 (0.45, 1.13)         | 1.02 (0.67, 1.56)         | 2.7E-01                   | 4.8E-01                      | 0.96 (0.74, 1.24)               | 7.6E-01   | 8.1E-01 | 1.0E+00            | 0.40    |
| 3-Hydroxyisovalerylcarnitine | Carnitines    | Ref.                 | 0.94 (0.57, 1.56)         | 0.44 (0.25, 0.77)         | 0.60 (0.37, 1.00)         | 2.8E-01                   | 4.8E-01                      | 0.54 (0.35, 0.83)               | 4.6E-03   | 1.4E-02 | 8.6E-01            | 7.75    |
| Acetylcarnitine              | Carnitines    | Ref.                 | 0.82 (0.52, 1.30)         | 0.99 (0.63, 1.56)         | 1.26 (0.82, 1.93)         | 1.8E-02                   | 1.5E-01                      | 1.35 (1.00, 1.82)               | 5.0E-02   | 9.2E-02 | 1.0E+00            | 4.34    |
| Adipoylcarnitine             | Carnitines    | Ref.                 | 0.93 (0.56, 1.55)         | 1.32 (0.79, 2.23)         | 1.19 (0.76, 1.88)         | 1.3E-01                   | 3.4E-01                      | 1.42 (1.00, 2.01)               | 5.3E-02   | 9.6E-02 | 1.0E+00            | 4.24    |
| Carnitine                    | Carnitines    | Ref.                 | 1.21 (0.78, 1.87)         | 1.63 (1.04, 2.53)         | 1.34 (0.85, 2.10)         | 5.7E-01                   | 6.9E-01                      | 1.64 (0.96, 2.79)               | 7.2E-02   | 1.2E-01 | 1.0E+00            | 3.80    |

| Metabolite                     | Class       | Categorical analysis |                           |                           |                           |                           |                              | Continuous analysis             |           |         |                    |         |
|--------------------------------|-------------|----------------------|---------------------------|---------------------------|---------------------------|---------------------------|------------------------------|---------------------------------|-----------|---------|--------------------|---------|
|                                |             | Q1                   | OR <sub>Q2</sub> (95% CI) | OR <sub>Q3</sub> (95% CI) | OR <sub>Q4</sub> (95% CI) | $P_{\text{non-linear}}^b$ | FDR <sub>non-linear}^b</sub> | OR <sub>doubling</sub> (95% CI) | $P$ value | FDR     | $P_{\text{Bon}}^c$ | S value |
| Decanoylcarnitine              | Carnitines  | Ref.                 | 0.67 (0.42, 1.06)         | 0.78 (0.49, 1.23)         | 1.32 (0.83, 2.12)         | 6.3E-02                   | 2.2E-01                      | 1.07 (0.88, 1.31)               | 4.8E-01   | 5.8E-01 | 1.0E+00            | 1.05    |
| Glutaryl carnitine             | Carnitines  | Ref.                 | 1.31 (0.84, 2.04)         | 1.43 (0.90, 2.28)         | 1.99 (1.26, 3.13)         | 6.9E-01                   | 7.8E-01                      | 2.03 (1.23, 3.37)               | 5.8E-03   | 1.6E-02 | 1.0E+00            | 7.42    |
| Hexanoylcarnitine              | Carnitines  | Ref.                 | 0.91 (0.55, 1.50)         | 1.02 (0.62, 1.67)         | 1.41 (0.88, 2.27)         | 4.9E-02                   | 2.0E-01                      | 1.01 (0.86, 1.17)               | 9.4E-01   | 9.4E-01 | 1.0E+00            | 0.09    |
| Isovalerylcarnitine            | Carnitines  | Ref.                 | 0.94 (0.60, 1.47)         | 0.88 (0.56, 1.39)         | 0.55 (0.34, 0.88)         | 9.9E-01                   | 9.9E-01                      | 0.80 (0.62, 1.03)               | 8.4E-02   | 1.4E-01 | 1.0E+00            | 3.57    |
| Lauroyl carnitine              | Carnitines  | Ref.                 | 1.01 (0.62, 1.64)         | 1.23 (0.75, 2.02)         | 1.83 (1.10, 3.04)         | 7.3E-02                   | 2.4E-01                      | 1.19 (1.01, 1.41)               | 3.9E-02   | 7.6E-02 | 1.0E+00            | 4.69    |
| Linoleyl carnitine             | Carnitines  | Ref.                 | 1.03 (0.66, 1.60)         | 0.93 (0.59, 1.48)         | 1.19 (0.74, 1.92)         | 2.6E-01                   | 4.8E-01                      | 1.15 (0.87, 1.50)               | 3.2E-01   | 4.4E-01 | 1.0E+00            | 1.63    |
| Malonylcarnitine               | Carnitines  | Ref.                 | 0.70 (0.42, 1.15)         | 0.69 (0.42, 1.11)         | 0.97 (0.62, 1.51)         | 2.0E-01                   | 4.2E-01                      | 0.96 (0.84, 1.09)               | 5.5E-01   | 6.5E-01 | 1.0E+00            | 0.86    |
| Myristoylcarnitine             | Carnitines  | Ref.                 | 0.72 (0.42, 1.25)         | 1.76 (0.99, 3.11)         | 2.57 (1.55, 4.26)         | 4.8E-02                   | 2.0E-01                      | 2.30 (1.52, 3.48)               | 8.2E-05   | 4.5E-04 | 1.5E-02            | 13.57   |
| Octanoylcarnitine              | Carnitines  | Ref.                 | 0.69 (0.44, 1.08)         | 0.94 (0.61, 1.45)         | 1.23 (0.78, 1.93)         | 8.2E-02                   | 2.6E-01                      | 1.09 (0.90, 1.33)               | 3.7E-01   | 4.9E-01 | 1.0E+00            | 1.42    |
| Oleylcarnitine                 | Carnitines  | Ref.                 | 0.81 (0.50, 1.31)         | 1.17 (0.73, 1.89)         | 1.71 (1.08, 2.71)         | 2.8E-02                   | 1.6E-01                      | 1.47 (1.11, 1.95)               | 6.5E-03   | 1.7E-02 | 1.0E+00            | 7.26    |
| Palmitoylcarnitine             | Carnitines  | Ref.                 | 0.87 (0.54, 1.39)         | 0.90 (0.57, 1.43)         | 1.88 (1.19, 2.98)         | 2.1E-02                   | 1.6E-01                      | 1.37 (1.02, 1.85)               | 3.9E-02   | 7.6E-02 | 1.0E+00            | 4.68    |
| Propionyl carnitine            | Carnitines  | Ref.                 | 1.14 (0.74, 1.76)         | 0.98 (0.63, 1.52)         | 1.28 (0.80, 2.02)         | 2.9E-01                   | 4.8E-01                      | 1.12 (0.78, 1.60)               | 5.3E-01   | 6.3E-01 | 1.0E+00            | 0.91    |
| Stearyl carnitine              | Carnitines  | Ref.                 | 0.91 (0.57, 1.46)         | 1.07 (0.68, 1.69)         | 1.66 (1.05, 2.62)         | 7.1E-01                   | 7.9E-01                      | 1.32 (1.07, 1.63)               | 1.0E-02   | 2.5E-02 | 1.0E+00            | 6.59    |
| 10Z-Heptadecenoic acid         | Fatty acids | Ref.                 | 1.18 (0.74, 1.87)         | 1.13 (0.71, 1.79)         | 1.53 (0.96, 2.44)         | 2.6E-01                   | 4.8E-01                      | 1.15 (1.01, 1.31)               | 3.6E-02   | 7.4E-02 | 1.0E+00            | 4.79    |
| 12-Hydroxystearic acid         | Fatty acids | Ref.                 | 0.74 (0.47, 1.18)         | 0.59 (0.35, 0.99)         | 0.52 (0.30, 0.90)         | 6.3E-01                   | 7.4E-01                      | 0.53 (0.32, 0.87)               | 1.2E-02   | 2.6E-02 | 1.0E+00            | 6.42    |
| 2-Hydroxy-3-methylbutyric acid | Fatty acids | Ref.                 | 1.28 (0.81, 2.01)         | 1.18 (0.74, 1.87)         | 1.55 (0.98, 2.45)         | 2.2E-01                   | 4.5E-01                      | 1.34 (1.11, 1.61)               | 2.1E-03   | 6.5E-03 | 3.9E-01            | 8.91    |
| 2,2-Dimethyladipic acid        | Fatty acids | Ref.                 | 1.06 (0.68, 1.64)         | 0.58 (0.34, 0.99)         | 0.90 (0.53, 1.53)         | 6.3E-01                   | 7.4E-01                      | 0.97 (0.89, 1.06)               | 5.1E-01   | 6.1E-01 | 1.0E+00            | 0.96    |
| 3-Methyladipic acid            | Fatty acids | Ref.                 | 1.12 (0.71, 1.76)         | 0.90 (0.55, 1.46)         | 0.72 (0.45, 1.16)         | 1.3E-02                   | 1.2E-01                      | 0.95 (0.85, 1.06)               | 3.7E-01   | 4.9E-01 | 1.0E+00            | 1.45    |
| 5-Dodecenoic acid              | Fatty acids | Ref.                 | 0.77 (0.47, 1.28)         | 1.12 (0.68, 1.85)         | 1.70 (1.05, 2.74)         | 4.8E-02                   | 2.0E-01                      | 1.26 (1.05, 1.51)               | 1.3E-02   | 2.9E-02 | 1.0E+00            | 6.24    |
| 8,11,14-Eicosatrienoic acid    | Fatty acids | Ref.                 | 0.62 (0.40, 0.95)         | 0.77 (0.50, 1.17)         | 0.71 (0.46, 1.11)         | 2.3E-02                   | 1.6E-01                      | 0.89 (0.76, 1.05)               | 1.7E-01   | 2.6E-01 | 1.0E+00            | 2.52    |
| Adrenic acid                   | Fatty acids | Ref.                 | 1.23 (0.80, 1.89)         | 1.06 (0.65, 1.71)         | 1.02 (0.63, 1.65)         | 9.4E-01                   | 9.8E-01                      | 1.01 (0.85, 1.21)               | 8.8E-01   | 9.0E-01 | 1.0E+00            | 0.18    |
| alpha-Linolenic acid           | Fatty acids | Ref.                 | 0.84 (0.55, 1.29)         | 0.85 (0.54, 1.34)         | 0.77 (0.49, 1.20)         | 3.6E-01                   | 5.2E-01                      | 0.91 (0.80, 1.04)               | 1.6E-01   | 2.4E-01 | 1.0E+00            | 2.63    |
| Arachidonic acid               | Fatty acids | Ref.                 | 0.45 (0.29, 0.70)         | 0.39 (0.24, 0.63)         | 0.37 (0.23, 0.60)         | 1.3E-03                   | 2.7E-02                      | 0.49 (0.37, 0.65)               | 6.0E-07   | 5.3E-06 | 1.1E-04            | 20.67   |
| Decanoic acid                  | Fatty acids | Ref.                 | 0.98 (0.59, 1.64)         | 1.70 (1.02, 2.83)         | 2.05 (1.26, 3.33)         | 6.9E-01                   | 7.8E-01                      | 1.30 (1.12, 1.51)               | 6.2E-04   | 2.6E-03 | 1.2E-01            | 10.65   |
| DHA                            | Fatty acids | Ref.                 | 0.78 (0.50, 1.21)         | 0.72 (0.45, 1.14)         | 0.69 (0.42, 1.12)         | 4.1E-02                   | 1.9E-01                      | 0.79 (0.66, 0.96)               | 1.6E-02   | 3.4E-02 | 1.0E+00            | 5.98    |
| Dodecanoic acid                | Fatty acids | Ref.                 | 1.04 (0.66, 1.63)         | 1.27 (0.80, 2.00)         | 1.16 (0.73, 1.86)         | 5.3E-01                   | 6.5E-01                      | 1.01 (0.91, 1.12)               | 8.2E-01   | 8.5E-01 | 1.0E+00            | 0.28    |
| DPAn-3                         | Fatty acids | Ref.                 | 0.79 (0.50, 1.25)         | 0.71 (0.44, 1.13)         | 0.71 (0.44, 1.15)         | 4.8E-03                   | 6.4E-02                      | 0.83 (0.70, 0.99)               | 4.3E-02   | 8.3E-02 | 1.0E+00            | 4.53    |
| DPAn-6                         | Fatty acids | Ref.                 | 1.24 (0.79, 1.94)         | 0.95 (0.59, 1.53)         | 0.90 (0.57, 1.40)         | 2.3E-01                   | 4.5E-01                      | 0.88 (0.75, 1.03)               | 1.2E-01   | 1.9E-01 | 1.0E+00            | 3.03    |
| EPA                            | Fatty acids | Ref.                 | 0.68 (0.43, 1.07)         | 0.57 (0.35, 0.94)         | 0.43 (0.26, 0.71)         | 7.8E-01                   | 8.3E-01                      | 0.75 (0.63, 0.89)               | 9.4E-04   | 3.4E-03 | 1.8E-01            | 10.05   |

| Metabolite                   | Class         | Categorical analysis |                           |                           |                           |                           |                              | Continuous analysis             |           |         |                    |         |
|------------------------------|---------------|----------------------|---------------------------|---------------------------|---------------------------|---------------------------|------------------------------|---------------------------------|-----------|---------|--------------------|---------|
|                              |               | Q1                   | OR <sub>Q2</sub> (95% CI) | OR <sub>Q3</sub> (95% CI) | OR <sub>Q4</sub> (95% CI) | $P_{\text{non-linear}}^b$ | FDR <sub>non-linear}^b</sub> | OR <sub>doubling</sub> (95% CI) | $P$ value | FDR     | $P_{\text{Bon}}^c$ | S value |
| gamma-Linolenic acid         | Fatty acids   | Ref.                 | 0.90 (0.58, 1.40)         | 0.75 (0.48, 1.17)         | 0.58 (0.36, 0.93)         | 1.5E-01                   | 3.6E-01                      | 0.81 (0.70, 0.93)               | 3.4E-03   | 1.0E-02 | 6.2E-01            | 8.22    |
| Heptadecanoic acid           | Fatty acids   | Ref.                 | 0.80 (0.50, 1.29)         | 0.88 (0.56, 1.38)         | 0.67 (0.40, 1.10)         | 2.9E-01                   | 4.8E-01                      | 0.76 (0.59, 1.00)               | 4.7E-02   | 8.8E-02 | 1.0E+00            | 4.42    |
| Heptanoic acid               | Fatty acids   | Ref.                 | 1.33 (0.85, 2.10)         | 1.20 (0.69, 2.10)         | 0.80 (0.44, 1.44)         | 3.2E-01                   | 5.0E-01                      | 0.91 (0.57, 1.44)               | 6.9E-01   | 7.6E-01 | 1.0E+00            | 0.54    |
| Linoleic acid                | Fatty acids   | Ref.                 | 0.75 (0.50, 1.14)         | 0.68 (0.44, 1.05)         | 0.71 (0.45, 1.12)         | 1.8E-01                   | 4.0E-01                      | 0.85 (0.71, 1.02)               | 8.8E-02   | 1.5E-01 | 1.0E+00            | 3.51    |
| Methylglutaric acid          | Fatty acids   | Ref.                 | 1.20 (0.69, 2.06)         | 1.65 (0.90, 3.02)         | 1.31 (0.76, 2.26)         | 3.9E-01                   | 5.4E-01                      | 1.09 (0.87, 1.37)               | 4.6E-01   | 5.6E-01 | 1.0E+00            | 1.11    |
| Methylmalonic acid           | Fatty acids   | Ref.                 | 0.88 (0.54, 1.44)         | 0.98 (0.59, 1.64)         | 1.37 (0.81, 2.32)         | 6.9E-03                   | 7.9E-02                      | 1.31 (1.01, 1.71)               | 4.3E-02   | 8.2E-02 | 1.0E+00            | 4.55    |
| Myristelaidic acid           | Fatty acids   | Ref.                 | 0.80 (0.48, 1.32)         | 0.94 (0.54, 1.64)         | 1.32 (0.79, 2.22)         | 6.6E-01                   | 7.7E-01                      | 1.10 (0.99, 1.21)               | 6.4E-02   | 1.1E-01 | 1.0E+00            | 3.98    |
| Myristic acid                | Fatty acids   | Ref.                 | 1.07 (0.68, 1.70)         | 1.34 (0.82, 2.19)         | 1.17 (0.69, 2.00)         | 9.7E-01                   | 9.9E-01                      | 1.26 (0.88, 1.80)               | 2.1E-01   | 2.9E-01 | 1.0E+00            | 2.26    |
| Myristoleic acid             | Fatty acids   | Ref.                 | 0.91 (0.57, 1.46)         | 1.07 (0.63, 1.81)         | 1.64 (1.01, 2.66)         | 2.7E-02                   | 1.6E-01                      | 1.26 (1.07, 1.49)               | 6.3E-03   | 1.6E-02 | 1.0E+00            | 7.32    |
| Nonanoic acid                | Fatty acids   | Ref.                 | 0.94 (0.58, 1.52)         | 0.84 (0.51, 1.37)         | 0.98 (0.59, 1.65)         | 9.5E-01                   | 9.8E-01                      | 1.02 (0.89, 1.16)               | 7.7E-01   | 8.1E-01 | 1.0E+00            | 0.38    |
| Octanoic acid                | Fatty acids   | Ref.                 | 0.81 (0.50, 1.29)         | 0.88 (0.54, 1.41)         | 1.14 (0.71, 1.84)         | 1.4E-01                   | 3.6E-01                      | 1.43 (0.98, 2.08)               | 6.1E-02   | 1.1E-01 | 1.0E+00            | 4.03    |
| Oleic acid                   | Fatty acids   | Ref.                 | 0.98 (0.64, 1.50)         | 0.89 (0.59, 1.35)         | 0.89 (0.56, 1.41)         | 2.9E-01                   | 4.8E-01                      | 0.96 (0.82, 1.14)               | 6.6E-01   | 7.5E-01 | 1.0E+00            | 0.59    |
| Palmitic acid                | Fatty acids   | Ref.                 | 0.74 (0.47, 1.17)         | 0.88 (0.55, 1.43)         | 0.71 (0.42, 1.20)         | 5.2E-01                   | 6.5E-01                      | 0.77 (0.42, 1.40)               | 3.9E-01   | 4.9E-01 | 1.0E+00            | 1.37    |
| Palmitoleic acid             | Fatty acids   | Ref.                 | 0.80 (0.50, 1.28)         | 1.06 (0.68, 1.65)         | 1.45 (0.91, 2.30)         | 3.1E-01                   | 4.9E-01                      | 1.18 (1.04, 1.34)               | 1.1E-02   | 2.6E-02 | 1.0E+00            | 6.46    |
| Pentadecanoic acid           | Fatty acids   | Ref.                 | 0.92 (0.60, 1.40)         | 0.90 (0.57, 1.42)         | 1.01 (0.63, 1.61)         | 6.1E-02                   | 2.2E-01                      | 1.06 (0.81, 1.38)               | 6.8E-01   | 7.6E-01 | 1.0E+00            | 0.55    |
| Ricinoleic acid              | Fatty acids   | Ref.                 | 0.50 (0.30, 0.82)         | 0.81 (0.48, 1.38)         | 1.06 (0.67, 1.66)         | 5.3E-01                   | 6.5E-01                      | 1.11 (0.89, 1.38)               | 3.4E-01   | 4.5E-01 | 1.0E+00            | 1.56    |
| Undecylenic acid             | Fatty acids   | Ref.                 | 1.12 (0.70, 1.79)         | 1.18 (0.73, 1.91)         | 1.39 (0.87, 2.22)         | 4.2E-02                   | 1.9E-01                      | 1.05 (0.93, 1.20)               | 4.1E-01   | 5.2E-01 | 1.0E+00            | 1.28    |
| 3-Indolepropionic acid       | Indoles       | Ref.                 | 1.03 (0.65, 1.63)         | 1.28 (0.83, 1.98)         | 1.14 (0.73, 1.78)         | 4.8E-01                   | 6.2E-01                      | 1.05 (0.98, 1.13)               | 1.9E-01   | 2.8E-01 | 1.0E+00            | 2.36    |
| Indoleacetic acid            | Indoles       | Ref.                 | 1.06 (0.69, 1.62)         | 0.68 (0.42, 1.10)         | 0.81 (0.52, 1.25)         | 3.4E-01                   | 5.1E-01                      | 0.96 (0.83, 1.11)               | 5.7E-01   | 6.7E-01 | 1.0E+00            | 0.80    |
| AMP                          | Nucleotides   | Ref.                 | 0.51 (0.33, 0.79)         | 0.30 (0.18, 0.49)         | 0.25 (0.15, 0.42)         | 4.3E-02                   | 1.9E-01                      | 0.71 (0.61, 0.82)               | 5.4E-06   | 3.6E-05 | 1.0E-03            | 17.49   |
| 2-Furoic acid                | Organic acids | Ref.                 | 3.53 (1.95, 6.38)         | 2.83 (1.55, 5.20)         | 3.37 (1.89, 6.01)         | 2.8E-01                   | 4.8E-01                      | 1.44 (1.20, 1.74)               | 1.2E-04   | 6.4E-04 | 2.3E-02            | 12.98   |
| 2-Hydroxybutyric acid        | Organic acids | Ref.                 | 0.69 (0.44, 1.06)         | 0.88 (0.56, 1.36)         | 0.92 (0.60, 1.40)         | 1.3E-01                   | 3.6E-01                      | 1.03 (0.84, 1.27)               | 7.6E-01   | 8.1E-01 | 1.0E+00            | 0.39    |
| 3-Hydroxybutyric acid        | Organic acids | Ref.                 | 0.75 (0.49, 1.14)         | 0.48 (0.30, 0.77)         | 0.67 (0.42, 1.07)         | 4.3E-02                   | 1.9E-01                      | 0.89 (0.77, 1.03)               | 1.3E-01   | 2.0E-01 | 1.0E+00            | 2.98    |
| 3-Methyl-2-oxovaleric acid   | Organic acids | Ref.                 | 0.91 (0.59, 1.40)         | 0.49 (0.29, 0.81)         | 0.60 (0.38, 0.96)         | 3.6E-01                   | 5.2E-01                      | 0.63 (0.42, 0.93)               | 2.2E-02   | 4.5E-02 | 1.0E+00            | 5.54    |
| Aconitic acid                | Organic acids | Ref.                 | 1.86 (0.99, 3.50)         | 4.31 (2.29, 8.10)         | 5.83 (3.06, 11.11)        | 5.7E-01                   | 6.9E-01                      | 9.37 (4.91, 17.88)              | 1.1E-11   | 1.9E-10 | 2.0E-09            | 36.41   |
| Adipic acid                  | Organic acids | Ref.                 | 0.84 (0.53, 1.33)         | 1.01 (0.64, 1.60)         | 0.94 (0.58, 1.55)         | 7.1E-01                   | 7.9E-01                      | 0.97 (0.84, 1.13)               | 7.2E-01   | 7.8E-01 | 1.0E+00            | 0.48    |
| alpha-Hydroxyisobutyric acid | Organic acids | Ref.                 | 0.67 (0.43, 1.04)         | 0.69 (0.44, 1.09)         | 1.09 (0.70, 1.69)         | 5.5E-02                   | 2.1E-01                      | 0.93 (0.80, 1.09)               | 3.7E-01   | 4.9E-01 | 1.0E+00            | 1.43    |
| alpha-Ketoisovaleric acid    | Organic acids | Ref.                 | 1.01 (0.66, 1.55)         | 0.81 (0.52, 1.26)         | 0.79 (0.50, 1.24)         | 2.6E-02                   | 1.6E-01                      | 0.63 (0.44, 0.90)               | 1.1E-02   | 2.6E-02 | 1.0E+00            | 6.48    |
| Azelaic acid                 | Organic acids | Ref.                 | 1.08 (0.69, 1.68)         | 0.85 (0.52, 1.37)         | 0.97 (0.61, 1.55)         | 6.8E-01                   | 7.8E-01                      | 0.97 (0.78, 1.22)               | 8.3E-01   | 8.5E-01 | 1.0E+00            | 0.28    |

| Metabolite                       | Class                 | Categorical analysis |                           |                           |                           |                           |                              | Continuous analysis             |           |         |                    |         |
|----------------------------------|-----------------------|----------------------|---------------------------|---------------------------|---------------------------|---------------------------|------------------------------|---------------------------------|-----------|---------|--------------------|---------|
|                                  |                       | Q1                   | OR <sub>Q2</sub> (95% CI) | OR <sub>Q3</sub> (95% CI) | OR <sub>Q4</sub> (95% CI) | $P_{\text{non-linear}}^b$ | FDR <sub>non-linear}^b</sub> | OR <sub>doubling</sub> (95% CI) | $P$ value | FDR     | $P_{\text{Bon}}^c$ | S value |
| Benzoic acid                     | Organic acids         | Ref.                 | 1.20 (0.72, 2.02)         | 1.37 (0.80, 2.36)         | 1.94 (1.12, 3.34)         | 2.8E-01                   | 4.8E-01                      | 10.74 (3.21, 35.89)             | 1.2E-04   | 6.2E-04 | 2.2E-02            | 13.08   |
| Citramalic acid                  | Organic acids         | Ref.                 | 0.98 (0.61, 1.58)         | 0.96 (0.61, 1.52)         | 1.06 (0.67, 1.67)         | 3.9E-01                   | 5.4E-01                      | 1.23 (0.99, 1.53)               | 5.7E-02   | 1.0E-01 | 1.0E+00            | 4.12    |
| Citric acid                      | Organic acids         | Ref.                 | 1.78 (1.01, 3.16)         | 2.05 (1.12, 3.77)         | 8.17 (4.41, 15.13)        | 1.3E-01                   | 3.5E-01                      | 17.34 (8.36, 35.98)             | 1.9E-14   | 4.3E-13 | 3.4E-12            | 45.62   |
| Erythronic acid                  | Organic acids         | Ref.                 | 0.78 (0.51, 1.20)         | 0.49 (0.31, 0.79)         | 0.89 (0.58, 1.37)         | 2.3E-02                   | 1.6E-01                      | 0.86 (0.69, 1.08)               | 1.9E-01   | 2.7E-01 | 1.0E+00            | 2.43    |
| Fumaric acid                     | Organic acids         | Ref.                 | 0.98 (0.62, 1.56)         | 1.00 (0.62, 1.63)         | 1.45 (0.91, 2.30)         | 3.2E-02                   | 1.7E-01                      | 1.05 (0.88, 1.24)               | 6.0E-01   | 7.0E-01 | 1.0E+00            | 0.73    |
| Glutaric acid                    | Organic acids         | Ref.                 | 1.01 (0.56, 1.80)         | 1.06 (0.60, 1.87)         | 3.31 (2.01, 5.47)         | 4.3E-07                   | 8.1E-05                      | 1.13 (1.06, 1.20)               | 2.4E-04   | 1.2E-03 | 4.4E-02            | 12.03   |
| Glycolic acid                    | Organic acids         | Ref.                 | 1.50 (0.89, 2.53)         | 1.89 (1.11, 3.20)         | 3.30 (2.00, 5.46)         | 2.7E-01                   | 4.8E-01                      | 3.89 (2.38, 6.37)               | 6.3E-08   | 6.5E-07 | 1.2E-05            | 23.91   |
| Guanidoacetic acid               | Organic acids         | Ref.                 | 1.38 (0.88, 2.14)         | 0.82 (0.50, 1.34)         | 1.54 (0.98, 2.40)         | 1.4E-02                   | 1.2E-01                      | 1.76 (1.19, 2.62)               | 5.0E-03   | 1.4E-02 | 9.4E-01            | 7.63    |
| Isocitric acid                   | Organic acids         | Ref.                 | 1.87 (0.98, 3.56)         | 3.00 (1.64, 5.47)         | 9.32 (4.86, 17.87)        | 7.5E-01                   | 8.2E-01                      | 6.64 (4.12, 10.68)              | 6.8E-15   | 1.8E-13 | 1.3E-12            | 47.06   |
| Ketoleucine                      | Organic acids         | Ref.                 | 0.74 (0.48, 1.13)         | 0.49 (0.31, 0.78)         | 0.55 (0.35, 0.86)         | 1.2E-01                   | 3.3E-01                      | 0.58 (0.40, 0.85)               | 4.7E-03   | 1.4E-02 | 8.8E-01            | 7.72    |
| Lactic acid                      | Organic acids         | Ref.                 | 0.88 (0.59, 1.33)         | 0.39 (0.24, 0.64)         | 0.53 (0.33, 0.86)         | 7.9E-01                   | 8.4E-01                      | 0.55 (0.36, 0.84)               | 6.0E-03   | 1.6E-02 | 1.0E+00            | 7.39    |
| Maleic acid                      | Organic acids         | Ref.                 | 0.82 (0.50, 1.33)         | 1.02 (0.63, 1.64)         | 1.15 (0.72, 1.84)         | 1.4E-01                   | 3.6E-01                      | 1.00 (0.82, 1.22)               | 9.9E-01   | 9.9E-01 | 1.0E+00            | 0.01    |
| Malic acid                       | Organic acids         | Ref.                 | 1.54 (0.93, 2.56)         | 1.58 (0.93, 2.66)         | 3.89 (2.27, 6.68)         | 4.9E-02                   | 2.0E-01                      | 1.82 (1.33, 2.48)               | 1.5E-04   | 7.8E-04 | 2.9E-02            | 12.66   |
| Malonic acid                     | Organic acids         | Ref.                 | 0.68 (0.42, 1.09)         | 1.09 (0.69, 1.72)         | 1.07 (0.68, 1.69)         | 3.2E-01                   | 5.0E-01                      | 0.97 (0.85, 1.10)               | 6.1E-01   | 7.0E-01 | 1.0E+00            | 0.71    |
| Methylsuccinic acid              | Organic acids         | Ref.                 | 1.44 (0.82, 2.54)         | 1.86 (1.07, 3.24)         | 4.61 (2.65, 8.00)         | 8.2E-05                   | 2.8E-03                      | 1.40 (1.22, 1.60)               | 1.1E-06   | 9.2E-06 | 2.1E-04            | 19.74   |
| Oxalic acid                      | Organic acids         | Ref.                 | 0.94 (0.60, 1.46)         | 0.82 (0.51, 1.32)         | 0.96 (0.60, 1.54)         | 3.6E-01                   | 5.2E-01                      | 0.88 (0.70, 1.10)               | 2.5E-01   | 3.5E-01 | 1.0E+00            | 1.98    |
| Oxoadipic acid                   | Organic acids         | Ref.                 | 0.80 (0.44, 1.46)         | 1.53 (0.87, 2.68)         | 2.49 (1.48, 4.20)         | 8.5E-02                   | 2.7E-01                      | 1.46 (1.16, 1.83)               | 1.2E-03   | 4.2E-03 | 2.2E-01            | 9.69    |
| Oxoglutaric acid                 | Organic acids         | Ref.                 | 1.13 (0.69, 1.86)         | 1.58 (0.97, 2.58)         | 3.91 (2.30, 6.63)         | 3.3E-05                   | 1.5E-03                      | 1.49 (1.17, 1.89)               | 1.1E-03   | 3.8E-03 | 2.0E-01            | 9.84    |
| Petroselinic acid                | Organic acids         | Ref.                 | 0.89 (0.58, 1.35)         | 0.95 (0.63, 1.43)         | 0.89 (0.56, 1.40)         | 2.4E-01                   | 4.6E-01                      | 0.98 (0.82, 1.17)               | 8.1E-01   | 8.4E-01 | 1.0E+00            | 0.31    |
| Pimelic acid                     | Organic acids         | Ref.                 | 0.49 (0.29, 0.81)         | 0.50 (0.29, 0.86)         | 0.67 (0.42, 1.06)         | 3.4E-01                   | 5.1E-01                      | 0.93 (0.83, 1.04)               | 2.0E-01   | 2.8E-01 | 1.0E+00            | 2.31    |
| Pyruvic acid                     | Organic acids         | Ref.                 | 0.88 (0.57, 1.37)         | 1.03 (0.67, 1.59)         | 0.79 (0.49, 1.28)         | 1.5E-01                   | 3.6E-01                      | 0.79 (0.65, 0.96)               | 2.0E-02   | 4.3E-02 | 1.0E+00            | 5.64    |
| Succinic acid                    | Organic acids         | Ref.                 | 0.84 (0.50, 1.42)         | 0.85 (0.50, 1.46)         | 1.43 (0.82, 2.48)         | 3.2E-02                   | 1.7E-01                      | 1.69 (1.16, 2.45)               | 5.8E-03   | 1.6E-02 | 1.0E+00            | 7.43    |
| 4-Hydroxyphenylpyruvic acid      | Phenols               | Ref.                 | 0.86 (0.54, 1.37)         | 1.03 (0.64, 1.65)         | 1.85 (1.17, 2.95)         | 6.6E-04                   | 1.5E-02                      | 1.19 (1.00, 1.40)               | 4.7E-02   | 8.8E-02 | 1.0E+00            | 4.42    |
| Homovanillic acid                | Phenols               | Ref.                 | 2.33 (1.23, 4.42)         | 4.42 (2.21, 8.84)         | 10.88 (5.59, 21.16)       | 4.3E-01                   | 5.7E-01                      | 6.34 (4.06, 9.90)               | 4.6E-16   | 1.4E-14 | 8.6E-14            | 50.95   |
| p-Hydroxyphenylacetic acid       | Phenols               | Ref.                 | 1.20 (0.77, 1.85)         | 0.81 (0.51, 1.29)         | 0.97 (0.62, 1.52)         | 7.7E-01                   | 8.3E-01                      | 0.96 (0.88, 1.06)               | 4.5E-01   | 5.6E-01 | 1.0E+00            | 1.15    |
| 2-Phenylpropionate               | Phenylpropanoic acids | Ref.                 | 1.81 (1.07, 3.04)         | 1.83 (1.11, 3.03)         | 2.24 (1.39, 3.61)         | 2.3E-01                   | 4.5E-01                      | 1.17 (1.06, 1.29)               | 1.6E-03   | 5.3E-03 | 3.0E-01            | 9.27    |
| 3-Hydroxyphenylhydraacrylic acid | Phenylpropanoic acids | Ref.                 | 0.86 (0.52, 1.42)         | 0.75 (0.44, 1.27)         | 0.80 (0.50, 1.30)         | 1.2E-01                   | 3.3E-01                      | 0.95 (0.84, 1.07)               | 3.8E-01   | 4.9E-01 | 1.0E+00            | 1.38    |
| Hydrocinnamic acid               | Phenylpropanoic acids | Ref.                 | 0.85 (0.51, 1.44)         | 1.57 (0.98, 2.50)         | 1.49 (0.97, 2.30)         | 3.7E-01                   | 5.2E-01                      | 1.16 (1.05, 1.29)               | 4.3E-03   | 1.3E-02 | 8.0E-01            | 7.87    |
| Hydroxyphenyllactic acid         | Phenylpropanoic acids | Ref.                 | 0.97 (0.53, 1.77)         | 1.85 (1.05, 3.29)         | 5.85 (3.30, 10.37)        | 1.8E-03                   | 3.0E-02                      | 3.42 (2.48, 4.71)               | 6.1E-14   | 1.3E-12 | 1.1E-11            | 43.90   |

| Metabolite               | Class                 | Categorical analysis |                           |                           |                           |                           |                              | Continuous analysis             |           |         |                    |         |
|--------------------------|-----------------------|----------------------|---------------------------|---------------------------|---------------------------|---------------------------|------------------------------|---------------------------------|-----------|---------|--------------------|---------|
|                          |                       | Q1                   | OR <sub>Q2</sub> (95% CI) | OR <sub>Q3</sub> (95% CI) | OR <sub>Q4</sub> (95% CI) | $P_{\text{non-linear}}^b$ | FDR <sub>non-linear}^b</sub> | OR <sub>doubling</sub> (95% CI) | $P$ value | FDR     | $P_{\text{Bon}}^c$ | S value |
| Phenyllactic acid        | Phenylpropanoic acids | Ref.                 | 0.92 (0.55, 1.55)         | 1.02 (0.60, 1.71)         | 2.23 (1.41, 3.54)         | 2.1E-01                   | 4.4E-01                      | 1.71 (1.35, 2.16)               | 6.9E-06   | 4.4E-05 | 1.3E-03            | 17.15   |
| N-Methylnicotinamide     | Pyridines             | Ref.                 | 1.37 (0.81, 2.31)         | 2.85 (1.78, 4.55)         | 2.19 (1.34, 3.56)         | 9.4E-02                   | 2.8E-01                      | 1.34 (1.17, 1.53)               | 2.6E-05   | 1.6E-04 | 4.9E-03            | 15.21   |
| 3-Hydroxyisovaleric acid | SCFAs                 | Ref.                 | 0.68 (0.43, 1.07)         | 0.92 (0.59, 1.43)         | 0.84 (0.55, 1.29)         | 2.3E-02                   | 1.6E-01                      | 0.89 (0.67, 1.20)               | 4.5E-01   | 5.6E-01 | 1.0E+00            | 1.14    |
| Acetic acid              | SCFAs                 | Ref.                 | 1.04 (0.65, 1.67)         | 1.30 (0.79, 2.12)         | 1.11 (0.69, 1.78)         | 9.0E-02                   | 2.7E-01                      | 0.97 (0.82, 1.14)               | 7.0E-01   | 7.7E-01 | 1.0E+00            | 0.50    |
| Butyric acid             | SCFAs                 | Ref.                 | 2.51 (1.37, 4.61)         | 3.47 (1.69, 7.13)         | 3.80 (1.75, 8.25)         | 5.4E-01                   | 6.6E-01                      | 3.21 (1.96, 5.25)               | 3.5E-06   | 2.5E-05 | 6.6E-04            | 18.11   |
| Caproic acid             | SCFAs                 | Ref.                 | 0.97 (0.61, 1.55)         | 1.22 (0.72, 2.09)         | 1.94 (1.06, 3.54)         | 6.6E-02                   | 2.2E-01                      | 1.87 (1.16, 3.03)               | 1.0E-02   | 2.5E-02 | 1.0E+00            | 6.62    |
| Ethylmethylacetic acid   | SCFAs                 | Ref.                 | 1.23 (0.77, 1.96)         | 1.46 (0.86, 2.48)         | 1.58 (0.92, 2.70)         | 3.5E-01                   | 5.2E-01                      | 1.50 (1.11, 2.01)               | 8.1E-03   | 2.0E-02 | 1.0E+00            | 6.94    |
| Formic acid              | SCFAs                 | Ref.                 | 1.43 (0.86, 2.37)         | 2.14 (1.31, 3.51)         | 2.44 (1.41, 4.22)         | 3.4E-01                   | 5.1E-01                      | 1.74 (1.25, 2.42)               | 1.1E-03   | 3.8E-03 | 2.0E-01            | 9.87    |
| Isobutyric acid          | SCFAs                 | Ref.                 | 0.62 (0.38, 1.02)         | 1.40 (0.83, 2.36)         | 1.14 (0.65, 1.99)         | 1.1E-01                   | 3.3E-01                      | 1.69 (1.13, 2.54)               | 1.1E-02   | 2.6E-02 | 1.0E+00            | 6.51    |
| Isocaproic acid          | SCFAs                 | Ref.                 | 1.07 (0.67, 1.71)         | 0.95 (0.60, 1.51)         | 0.89 (0.56, 1.42)         | 2.5E-01                   | 4.8E-01                      | 0.91 (0.70, 1.17)               | 4.6E-01   | 5.6E-01 | 1.0E+00            | 1.12    |
| Isovaleric acid          | SCFAs                 | Ref.                 | 0.85 (0.54, 1.34)         | 0.84 (0.53, 1.34)         | 0.93 (0.59, 1.49)         | 6.8E-02                   | 2.3E-01                      | 1.15 (0.97, 1.37)               | 1.0E-01   | 1.7E-01 | 1.0E+00            | 3.27    |
| Pentanoic acid           | SCFAs                 | Ref.                 | 1.18 (0.76, 1.84)         | 0.95 (0.58, 1.54)         | 1.28 (0.78, 2.08)         | 2.2E-01                   | 4.5E-01                      | 1.15 (0.94, 1.42)               | 1.8E-01   | 2.6E-01 | 1.0E+00            | 2.49    |
| Propanoic acid           | SCFAs                 | Ref.                 | 1.22 (0.73, 2.03)         | 1.87 (1.11, 3.18)         | 3.13 (1.74, 5.65)         | 7.7E-01                   | 8.3E-01                      | 5.33 (2.74, 10.37)              | 8.7E-07   | 7.4E-06 | 1.6E-04            | 20.13   |

a Conditioned on matching factors.

b Log<sub>2</sub>-transformed metabolite concentrations was fitted with a 3-knots restricted cubic spline (10<sup>th</sup>, 50<sup>th</sup>, and 90<sup>th</sup> percentile).

c Bonferroni corrected  $P$  values.

Supplementary Table ST4 Association between all quantitated metabolites and liver cancer risk (Model 2)<sup>a</sup>

| Metabolite              | Class       | Categorical analysis |                           |                           |                           |                                             |                                        | Continuous analysis             |                |         |                                      |         |
|-------------------------|-------------|----------------------|---------------------------|---------------------------|---------------------------|---------------------------------------------|----------------------------------------|---------------------------------|----------------|---------|--------------------------------------|---------|
|                         |             | Q1                   | OR <sub>Q2</sub> (95% CI) | OR <sub>Q3</sub> (95% CI) | OR <sub>Q4</sub> (95% CI) | <i>P</i> <sub>non-linear</sub> <sup>b</sup> | FDR <sub>non-linear</sub> <sup>b</sup> | OR <sub>doubling</sub> (95% CI) | <i>P</i> value | FDR     | <i>P</i> <sub>Bon</sub> <sup>c</sup> | S value |
| 2-Hydroxyglutaric acid  | Amino acids | Ref.                 | 1.57 (0.68, 3.64)         | 1.49 (0.62, 3.59)         | 1.42 (0.61, 3.31)         | 3.4E-01                                     | 6.8E-01                                | 1.24 (0.87, 1.77)               | 2.4E-01        | 4.4E-01 | 1.0E+00                              | 2.04    |
| 2-Phenylglycine         | Amino acids | Ref.                 | 0.32 (0.14, 0.73)         | 0.83 (0.38, 1.84)         | 0.78 (0.36, 1.71)         | 2.4E-03                                     | 1.2E-01                                | 0.80 (0.54, 1.17)               | 2.5E-01        | 4.4E-01 | 1.0E+00                              | 2.02    |
| 5-Aminolevulinic acid   | Amino acids | Ref.                 | 0.58 (0.27, 1.21)         | 0.93 (0.44, 1.94)         | 0.45 (0.19, 1.06)         | 1.8E-01                                     | 5.6E-01                                | 0.75 (0.47, 1.20)               | 2.2E-01        | 4.2E-01 | 1.0E+00                              | 2.16    |
| Alanine                 | Amino acids | Ref.                 | 0.59 (0.26, 1.38)         | 0.53 (0.23, 1.18)         | 0.55 (0.26, 1.19)         | 2.5E-01                                     | 6.2E-01                                | 0.36 (0.15, 0.90)               | 2.9E-02        | 1.2E-01 | 1.0E+00                              | 5.13    |
| alpha-Aminobutyric acid | Amino acids | Ref.                 | 0.78 (0.38, 1.60)         | 0.44 (0.21, 0.93)         | 0.76 (0.34, 1.68)         | 3.8E-02                                     | 3.5E-01                                | 0.70 (0.36, 1.38)               | 3.0E-01        | 5.1E-01 | 1.0E+00                              | 1.71    |
| Arginine                | Amino acids | Ref.                 | 2.88 (1.15, 7.26)         | 3.12 (1.20, 8.13)         | 1.91 (0.74, 4.92)         | 3.4E-02                                     | 3.5E-01                                | 0.97 (0.50, 1.90)               | 9.4E-01        | 9.6E-01 | 1.0E+00                              | 0.10    |
| Asparagine              | Amino acids | Ref.                 | 1.25 (0.56, 2.77)         | 1.12 (0.50, 2.51)         | 1.15 (0.48, 2.71)         | 5.4E-01                                     | 7.6E-01                                | 1.14 (0.48, 2.71)               | 7.7E-01        | 9.1E-01 | 1.0E+00                              | 0.37    |
| Aspartic acid           | Amino acids | Ref.                 | 1.09 (0.52, 2.28)         | 1.23 (0.58, 2.62)         | 1.74 (0.74, 4.12)         | 3.8E-01                                     | 7.0E-01                                | 1.93 (1.03, 3.62)               | 4.0E-02        | 1.4E-01 | 1.0E+00                              | 4.66    |
| beta-Alanine            | Amino acids | Ref.                 | 0.51 (0.24, 1.08)         | 0.61 (0.27, 1.37)         | 0.44 (0.19, 1.00)         | 2.5E-01                                     | 6.2E-01                                | 0.70 (0.54, 0.90)               | 4.8E-03        | 3.6E-02 | 9.0E-01                              | 7.69    |
| Citrulline              | Amino acids | Ref.                 | 1.13 (0.45, 2.81)         | 1.93 (0.81, 4.61)         | 2.00 (0.81, 4.93)         | 7.3E-01                                     | 8.5E-01                                | 1.61 (0.85, 3.04)               | 1.4E-01        | 2.9E-01 | 1.0E+00                              | 2.83    |
| Creatine                | Amino acids | Ref.                 | 0.61 (0.30, 1.24)         | 0.30 (0.13, 0.67)         | 0.46 (0.20, 1.06)         | 3.5E-02                                     | 3.5E-01                                | 0.52 (0.33, 0.81)               | 4.3E-03        | 3.5E-02 | 8.0E-01                              | 7.86    |
| Dimethylglycine         | Amino acids | Ref.                 | 0.93 (0.39, 2.23)         | 1.52 (0.61, 3.77)         | 2.84 (1.27, 6.37)         | 1.9E-01                                     | 5.6E-01                                | 2.24 (1.19, 4.22)               | 1.3E-02        | 6.6E-02 | 1.0E+00                              | 6.29    |
| GABA                    | Amino acids | Ref.                 | 0.36 (0.15, 0.87)         | 0.43 (0.17, 1.04)         | 0.89 (0.40, 1.99)         | 5.9E-01                                     | 8.2E-01                                | 1.13 (0.65, 1.98)               | 6.7E-01        | 8.1E-01 | 1.0E+00                              | 0.59    |
| Glutamic acid           | Amino acids | Ref.                 | 2.36 (1.02, 5.44)         | 1.88 (0.79, 4.46)         | 2.28 (0.92, 5.62)         | 5.3E-01                                     | 7.5E-01                                | 1.78 (0.92, 3.43)               | 8.6E-02        | 2.4E-01 | 1.0E+00                              | 3.53    |
| Glutamine               | Amino acids | Ref.                 | 0.22 (0.09, 0.50)         | 0.32 (0.14, 0.72)         | 0.48 (0.21, 1.07)         | 1.3E-02                                     | 2.4E-01                                | 0.47 (0.20, 1.09)               | 7.8E-02        | 2.2E-01 | 1.0E+00                              | 3.69    |
| Glycine                 | Amino acids | Ref.                 | 0.64 (0.31, 1.32)         | 0.51 (0.23, 1.15)         | 0.71 (0.33, 1.54)         | 1.3E-01                                     | 5.2E-01                                | 0.64 (0.29, 1.41)               | 2.7E-01        | 4.6E-01 | 1.0E+00                              | 1.91    |
| Hippuric acid           | Amino acids | Ref.                 | 1.32 (0.64, 2.70)         | 0.90 (0.41, 1.99)         | 0.61 (0.27, 1.37)         | 1.5E-01                                     | 5.2E-01                                | 0.89 (0.74, 1.07)               | 2.2E-01        | 4.2E-01 | 1.0E+00                              | 2.17    |
| Histidine               | Amino acids | Ref.                 | 0.66 (0.30, 1.48)         | 0.75 (0.33, 1.69)         | 0.63 (0.29, 1.37)         | 7.7E-01                                     | 8.6E-01                                | 1.04 (0.37, 2.92)               | 9.4E-01        | 9.6E-01 | 1.0E+00                              | 0.08    |
| Homoserine              | Amino acids | Ref.                 | 1.13 (0.52, 2.44)         | 1.46 (0.65, 3.29)         | 1.08 (0.46, 2.56)         | 6.6E-01                                     | 8.5E-01                                | 1.49 (0.75, 2.96)               | 2.5E-01        | 4.4E-01 | 1.0E+00                              | 1.99    |
| Isoleucine              | Amino acids | Ref.                 | 0.93 (0.42, 2.06)         | 1.01 (0.45, 2.25)         | 0.50 (0.20, 1.24)         | 2.4E-01                                     | 6.2E-01                                | 0.57 (0.31, 1.07)               | 7.9E-02        | 2.2E-01 | 1.0E+00                              | 3.65    |
| Leucine                 | Amino acids | Ref.                 | 0.57 (0.26, 1.28)         | 0.73 (0.32, 1.67)         | 0.49 (0.21, 1.12)         | 5.1E-01                                     | 7.4E-01                                | 0.50 (0.24, 1.05)               | 6.9E-02        | 2.0E-01 | 1.0E+00                              | 3.86    |
| Lysine                  | Amino acids | Ref.                 | 0.56 (0.25, 1.26)         | 0.16 (0.06, 0.42)         | 0.32 (0.14, 0.76)         | 2.0E-01                                     | 5.9E-01                                | 0.16 (0.06, 0.41)               | 1.6E-04        | 3.3E-03 | 3.0E-02                              | 12.62   |
| Methionine              | Amino acids | Ref.                 | 1.25 (0.54, 2.88)         | 1.57 (0.68, 3.60)         | 1.58 (0.72, 3.44)         | 7.0E-01                                     | 8.5E-01                                | 1.42 (0.74, 2.73)               | 3.0E-01        | 5.0E-01 | 1.0E+00                              | 1.76    |
| Methylcysteine          | Amino acids | Ref.                 | 0.60 (0.28, 1.32)         | 0.55 (0.25, 1.23)         | 0.65 (0.28, 1.51)         | 5.1E-01                                     | 7.4E-01                                | 0.79 (0.48, 1.30)               | 3.6E-01        | 5.5E-01 | 1.0E+00                              | 1.48    |
| N-Acetylglycine         | Amino acids | Ref.                 | 0.42 (0.20, 0.90)         | 0.44 (0.21, 0.92)         | 0.75 (0.36, 1.56)         | 1.4E-01                                     | 5.2E-01                                | 0.76 (0.35, 1.66)               | 4.9E-01        | 6.6E-01 | 1.0E+00                              | 1.01    |
| N-Acetylserine          | Amino acids | Ref.                 | 1.52 (0.69, 3.36)         | 1.41 (0.63, 3.15)         | 2.84 (1.20, 6.74)         | 7.3E-01                                     | 8.5E-01                                | 2.17 (0.84, 5.63)               | 1.1E-01        | 2.6E-01 | 1.0E+00                              | 3.17    |
| N-Phenylacetylglutamine | Amino acids | Ref.                 | 0.79 (0.36, 1.78)         | 0.56 (0.25, 1.25)         | 1.58 (0.72, 3.47)         | 3.7E-01                                     | 7.0E-01                                | 1.04 (0.84, 1.29)               | 7.2E-01        | 8.7E-01 | 1.0E+00                              | 0.47    |
| Norvaline               | Amino acids | Ref.                 | 1.29 (0.53, 3.15)         | 1.82 (0.68, 4.92)         | 1.06 (0.37, 2.98)         | 1.4E-01                                     | 5.2E-01                                | 1.62 (0.06, 42.13)              | 7.7E-01        | 9.1E-01 | 1.0E+00                              | 0.37    |

| Metabolite                     | Class         | Categorical analysis |                           |                           |                           |                                             |                                        | Continuous analysis             |                |         |                                      |         |
|--------------------------------|---------------|----------------------|---------------------------|---------------------------|---------------------------|---------------------------------------------|----------------------------------------|---------------------------------|----------------|---------|--------------------------------------|---------|
|                                |               | Q1                   | OR <sub>Q2</sub> (95% CI) | OR <sub>Q3</sub> (95% CI) | OR <sub>Q4</sub> (95% CI) | <i>P</i> <sub>non-linear</sub> <sup>b</sup> | FDR <sub>non-linear</sub> <sup>b</sup> | OR <sub>doubling</sub> (95% CI) | <i>P</i> value | FDR     | <i>P</i> <sub>Bon</sub> <sup>c</sup> | S value |
| Ornithine                      | Amino acids   | Ref.                 | 0.61 (0.26, 1.45)         | 1.05 (0.48, 2.32)         | 0.91 (0.40, 2.10)         | 9.8E-01                                     | 9.8E-01                                | 1.07 (0.56, 2.03)               | 8.4E-01        | 9.2E-01 | 1.0E+00                              | 0.26    |
| Phenylalanine                  | Amino acids   | Ref.                 | 1.11 (0.48, 2.58)         | 1.24 (0.53, 2.89)         | 1.41 (0.61, 3.25)         | 8.5E-01                                     | 9.1E-01                                | 1.34 (0.45, 3.94)               | 6.0E-01        | 7.8E-01 | 1.0E+00                              | 0.74    |
| Pipecolic acid                 | Amino acids   | Ref.                 | 2.68 (1.12, 6.40)         | 2.92 (1.16, 7.37)         | 4.06 (1.63, 10.10)        | 4.2E-01                                     | 7.0E-01                                | 2.04 (1.23, 3.39)               | 5.8E-03        | 4.1E-02 | 1.0E+00                              | 7.43    |
| Proline                        | Amino acids   | Ref.                 | 0.97 (0.43, 2.19)         | 2.62 (1.12, 6.18)         | 0.98 (0.41, 2.33)         | 2.5E-02                                     | 3.4E-01                                | 0.95 (0.49, 1.84)               | 8.7E-01        | 9.4E-01 | 1.0E+00                              | 0.20    |
| Pyroglutamic acid              | Amino acids   | Ref.                 | 2.16 (1.02, 4.60)         | 0.65 (0.26, 1.64)         | 3.38 (1.38, 8.30)         | 2.6E-01                                     | 6.2E-01                                | 2.24 (1.19, 4.23)               | 1.2E-02        | 6.6E-02 | 1.0E+00                              | 6.33    |
| Sarcosine                      | Amino acids   | Ref.                 | 0.57 (0.25, 1.29)         | 0.63 (0.30, 1.32)         | 0.91 (0.41, 2.06)         | 3.9E-01                                     | 7.0E-01                                | 0.83 (0.40, 1.71)               | 6.1E-01        | 7.8E-01 | 1.0E+00                              | 0.72    |
| Selenomethionine               | Amino acids   | Ref.                 | 0.83 (0.24, 2.82)         | 0.54 (0.15, 1.97)         | 1.39 (0.41, 4.68)         | 5.2E-02                                     | 4.2E-01                                | 1.56 (0.64, 3.84)               | 3.3E-01        | 5.2E-01 | 1.0E+00                              | 1.60    |
| Serine                         | Amino acids   | Ref.                 | 1.43 (0.68, 2.99)         | 1.30 (0.59, 2.88)         | 2.48 (1.11, 5.54)         | 1.5E-01                                     | 5.2E-01                                | 1.89 (0.88, 4.04)               | 1.0E-01        | 2.5E-01 | 1.0E+00                              | 3.30    |
| Threonine                      | Amino acids   | Ref.                 | 1.02 (0.48, 2.20)         | 0.86 (0.38, 1.96)         | 1.10 (0.48, 2.56)         | 3.4E-01                                     | 6.8E-01                                | 1.40 (0.61, 3.20)               | 4.3E-01        | 6.3E-01 | 1.0E+00                              | 1.22    |
| Tryptophan                     | Amino acids   | Ref.                 | 0.78 (0.36, 1.72)         | 0.89 (0.40, 1.96)         | 0.66 (0.31, 1.43)         | 4.2E-01                                     | 7.0E-01                                | 0.61 (0.24, 1.56)               | 3.0E-01        | 5.1E-01 | 1.0E+00                              | 1.72    |
| Tyrosine                       | Amino acids   | Ref.                 | 1.08 (0.38, 3.05)         | 3.22 (1.14, 9.08)         | 5.38 (1.97, 14.70)        | 4.6E-01                                     | 7.4E-01                                | 5.82 (2.38, 14.20)              | 1.1E-04        | 2.8E-03 | 2.0E-02                              | 13.15   |
| Valine                         | Amino acids   | Ref.                 | 1.33 (0.62, 2.86)         | 0.22 (0.08, 0.57)         | 0.78 (0.33, 1.83)         | 5.0E-01                                     | 7.4E-01                                | 0.49 (0.19, 1.30)               | 1.5E-01        | 3.1E-01 | 1.0E+00                              | 2.72    |
| ortho-Hydroxyphenylacetic acid | Benzenoids    | Ref.                 | 0.69 (0.33, 1.45)         | 0.68 (0.32, 1.47)         | 0.57 (0.26, 1.24)         | 4.4E-01                                     | 7.1E-01                                | 0.67 (0.45, 1.01)               | 5.7E-02        | 1.8E-01 | 1.0E+00                              | 4.14    |
| Phenylacetic acid              | Benzenoids    | Ref.                 | 0.86 (0.37, 2.01)         | 1.35 (0.63, 2.93)         | 1.93 (0.84, 4.43)         | 4.1E-01                                     | 7.0E-01                                | 1.16 (0.95, 1.42)               | 1.4E-01        | 2.9E-01 | 1.0E+00                              | 2.87    |
| Phenylpyruvic acid             | Benzenoids    | Ref.                 | 1.48 (0.67, 3.27)         | 1.82 (0.76, 4.37)         | 1.09 (0.49, 2.41)         | 7.0E-02                                     | 4.7E-01                                | 0.97 (0.72, 1.32)               | 8.6E-01        | 9.4E-01 | 1.0E+00                              | 0.21    |
| 4-Hydroxybenzoic acid          | Benzoic acids | Ref.                 | 0.47 (0.20, 1.09)         | 0.77 (0.33, 1.80)         | 1.69 (0.78, 3.63)         | 9.0E-01                                     | 9.3E-01                                | 2.18 (0.88, 5.39)               | 9.0E-02        | 2.4E-01 | 1.0E+00                              | 3.47    |
| m-Aminobenzoic acid            | Benzoic acids | Ref.                 | 1.41 (0.68, 2.94)         | 0.70 (0.30, 1.65)         | 0.84 (0.40, 1.77)         | 4.9E-01                                     | 7.4E-01                                | 0.98 (0.71, 1.35)               | 9.0E-01        | 9.5E-01 | 1.0E+00                              | 0.15    |
| m-Hydroxyhippuric acid         | Benzoic acids | Ref.                 | 0.52 (0.17, 1.56)         | 0.72 (0.30, 1.75)         | 0.47 (0.19, 1.16)         | 2.6E-01                                     | 6.2E-01                                | 0.68 (0.37, 1.26)               | 2.2E-01        | 4.2E-01 | 1.0E+00                              | 2.20    |
| Phthalic acid                  | Benzoic acids | Ref.                 | 1.01 (0.46, 2.21)         | 1.06 (0.47, 2.39)         | 0.90 (0.38, 2.14)         | 8.7E-01                                     | 9.2E-01                                | 0.93 (0.50, 1.73)               | 8.2E-01        | 9.2E-01 | 1.0E+00                              | 0.29    |
| 7-DHCA                         | Bile acids    | Ref.                 | 1.22 (0.43, 3.52)         | 1.67 (0.57, 4.86)         | 2.32 (0.85, 6.34)         | 7.0E-01                                     | 8.5E-01                                | 1.57 (1.03, 2.38)               | 3.5E-02        | 1.3E-01 | 1.0E+00                              | 4.85    |
| apoCA                          | Bile acids    | Ref.                 | 0.55 (0.24, 1.28)         | 1.08 (0.45, 2.57)         | 0.66 (0.28, 1.57)         | 9.5E-01                                     | 9.6E-01                                | 0.65 (0.32, 1.33)               | 2.4E-01        | 4.4E-01 | 1.0E+00                              | 2.06    |
| beta-HDCA                      | Bile acids    | Ref.                 | 1.17 (0.52, 2.64)         | 0.93 (0.42, 2.08)         | 1.61 (0.72, 3.63)         | 1.5E-01                                     | 5.2E-01                                | 1.10 (0.93, 1.31)               | 2.5E-01        | 4.4E-01 | 1.0E+00                              | 2.02    |
| CA                             | Bile acids    | Ref.                 | 2.16 (0.86, 5.40)         | 3.05 (1.16, 8.00)         | 2.71 (1.03, 7.13)         | 1.0E-01                                     | 5.2E-01                                | 1.22 (1.01, 1.48)               | 4.1E-02        | 1.4E-01 | 1.0E+00                              | 4.59    |
| CDCA                           | Bile acids    | Ref.                 | 2.27 (0.99, 5.22)         | 1.81 (0.80, 4.08)         | 3.19 (1.34, 7.61)         | 7.9E-02                                     | 4.7E-01                                | 1.20 (1.02, 1.43)               | 3.2E-02        | 1.2E-01 | 1.0E+00                              | 4.97    |
| DCA                            | Bile acids    | Ref.                 | 0.95 (0.41, 2.18)         | 0.75 (0.35, 1.59)         | 0.66 (0.29, 1.50)         | 7.4E-01                                     | 8.5E-01                                | 0.84 (0.66, 1.06)               | 1.4E-01        | 3.0E-01 | 1.0E+00                              | 2.80    |
| GCA                            | Bile acids    | Ref.                 | 3.39 (1.15, 9.94)         | 5.15 (1.62, 16.41)        | 12.74 (4.17, 38.89)       | 2.5E-01                                     | 6.2E-01                                | 1.66 (1.35, 2.04)               | 1.2E-06        | 7.5E-05 | 2.2E-04                              | 19.66   |
| GCDCA                          | Bile acids    | Ref.                 | 2.42 (0.77, 7.57)         | 5.25 (1.85, 14.86)        | 14.97 (4.92, 45.53)       | 7.5E-02                                     | 4.7E-01                                | 2.03 (1.54, 2.68)               | 4.5E-07        | 4.2E-05 | 8.3E-05                              | 21.09   |
| GDCA                           | Bile acids    | Ref.                 | 0.51 (0.22, 1.22)         | 0.94 (0.40, 2.21)         | 1.53 (0.67, 3.47)         | 1.1E-01                                     | 5.2E-01                                | 1.07 (0.96, 1.20)               | 2.0E-01        | 3.9E-01 | 1.0E+00                              | 2.31    |
| GHCA                           | Bile acids    | Ref.                 | 1.10 (0.38, 3.21)         | 2.67 (0.81, 8.85)         | 2.95 (0.98, 8.88)         | 2.9E-01                                     | 6.4E-01                                | 1.81 (1.24, 2.66)               | 2.3E-03        | 2.2E-02 | 4.3E-01                              | 8.74    |



| Metabolite                   | Class         | Categorical analysis |                           |                           |                           |                                             |                                        | Continuous analysis             |                |         |                                      |         |  |
|------------------------------|---------------|----------------------|---------------------------|---------------------------|---------------------------|---------------------------------------------|----------------------------------------|---------------------------------|----------------|---------|--------------------------------------|---------|--|
|                              |               | Q1                   | OR <sub>Q2</sub> (95% CI) | OR <sub>Q3</sub> (95% CI) | OR <sub>Q4</sub> (95% CI) | <i>P</i> <sub>non-linear</sub> <sup>b</sup> | FDR <sub>non-linear</sub> <sup>b</sup> | OR <sub>doubling</sub> (95% CI) | <i>P</i> value | FDR     | <i>P</i> <sub>Bon</sub> <sup>c</sup> | S value |  |
| GLCA                         | Bile acids    | Ref.                 | 0.72 (0.34, 1.56)         | 1.25 (0.55, 2.85)         | 0.78 (0.36, 1.69)         | 6.8E-01                                     | 8.5E-01                                | 0.98 (0.69, 1.41)               | 9.3E-01        | 9.6E-01 | 1.0E+00                              | 0.11    |  |
| GLCA-3S                      | Bile acids    | Ref.                 | 1.80 (0.76, 4.26)         | 1.37 (0.61, 3.05)         | 1.47 (0.65, 3.32)         | 7.2E-01                                     | 8.5E-01                                | 1.07 (0.90, 1.28)               | 4.4E-01        | 6.3E-01 | 1.0E+00                              | 1.18    |  |
| GUDCA                        | Bile acids    | Ref.                 | 1.25 (0.52, 2.99)         | 1.86 (0.73, 4.75)         | 3.53 (1.48, 8.45)         | 4.8E-01                                     | 7.4E-01                                | 1.45 (1.20, 1.77)               | 1.7E-04        | 3.3E-03 | 3.3E-02                              | 12.48   |  |
| HCA                          | Bile acids    | Ref.                 | 1.85 (0.73, 4.66)         | 1.45 (0.51, 4.07)         | 3.50 (1.36, 8.99)         | 1.3E-01                                     | 5.2E-01                                | 2.54 (1.26, 5.10)               | 9.1E-03        | 5.8E-02 | 1.0E+00                              | 6.78    |  |
| HDCA                         | Bile acids    | Ref.                 | 0.87 (0.39, 1.91)         | 0.65 (0.27, 1.56)         | 0.59 (0.25, 1.39)         | 4.6E-01                                     | 7.4E-01                                | 0.77 (0.60, 0.99)               | 4.0E-02        | 1.4E-01 | 1.0E+00                              | 4.63    |  |
| LCA                          | Bile acids    | Ref.                 | 0.61 (0.24, 1.52)         | 0.75 (0.28, 2.05)         | 1.39 (0.63, 3.06)         | 2.1E-02                                     | 3.3E-01                                | 1.04 (0.79, 1.37)               | 7.9E-01        | 9.1E-01 | 1.0E+00                              | 0.34    |  |
| TCA                          | Bile acids    | Ref.                 | 4.28 (1.33, 13.78)        | 2.63 (0.82, 8.45)         | 13.36 (4.35, 41.03)       | 3.3E-01                                     | 6.7E-01                                | 1.59 (1.31, 1.93)               | 3.2E-06        | 1.2E-04 | 6.0E-04                              | 18.25   |  |
| TCDCA                        | Bile acids    | Ref.                 | 2.94 (0.88, 9.82)         | 3.79 (1.26, 11.41)        | 19.06 (5.91, 61.49)       | 5.9E-01                                     | 8.2E-01                                | 1.88 (1.48, 2.39)               | 2.3E-07        | 4.2E-05 | 4.3E-05                              | 22.06   |  |
| TDCA                         | Bile acids    | Ref.                 | 2.25 (0.87, 5.82)         | 0.92 (0.33, 2.54)         | 4.95 (1.88, 13.01)        | 7.6E-01                                     | 8.5E-01                                | 1.43 (1.14, 1.78)               | 1.7E-03        | 1.9E-02 | 3.2E-01                              | 9.19    |  |
| UCA                          | Bile acids    | Ref.                 | 1.33 (0.41, 4.33)         | 1.23 (0.37, 4.06)         | 1.50 (0.49, 4.64)         | 7.2E-01                                     | 8.5E-01                                | 1.57 (0.87, 2.84)               | 1.4E-01        | 2.9E-01 | 1.0E+00                              | 2.87    |  |
| D-Xylulose                   | Carbohydrates | Ref.                 | 2.35 (0.90, 6.15)         | 2.94 (1.09, 7.98)         | 3.61 (1.41, 9.26)         | 7.2E-01                                     | 8.5E-01                                | 3.56 (1.61, 7.88)               | 1.7E-03        | 1.9E-02 | 3.2E-01                              | 9.19    |  |
| Fructose                     | Carbohydrates | Ref.                 | 1.36 (0.59, 3.11)         | 1.16 (0.49, 2.76)         | 2.34 (1.01, 5.44)         | 1.6E-01                                     | 5.2E-01                                | 1.40 (1.10, 1.79)               | 6.4E-03        | 4.4E-02 | 1.0E+00                              | 7.30    |  |
| Galactonic acid              | Carbohydrates | Ref.                 | 1.46 (0.64, 3.36)         | 0.94 (0.45, 1.99)         | 1.22 (0.54, 2.77)         | 4.9E-01                                     | 7.4E-01                                | 1.02 (0.66, 1.59)               | 9.2E-01        | 9.6E-01 | 1.0E+00                              | 0.12    |  |
| Gluconolactone               | Carbohydrates | Ref.                 | 0.64 (0.30, 1.39)         | 0.54 (0.24, 1.19)         | 1.67 (0.70, 4.03)         | 1.6E-01                                     | 5.2E-01                                | 1.39 (0.73, 2.65)               | 3.2E-01        | 5.1E-01 | 1.0E+00                              | 1.65    |  |
| Glucose                      | Carbohydrates | Ref.                 | 1.41 (0.59, 3.39)         | 0.88 (0.40, 1.94)         | 1.67 (0.78, 3.58)         | 1.8E-01                                     | 5.6E-01                                | 2.20 (1.16, 4.16)               | 1.5E-02        | 7.4E-02 | 1.0E+00                              | 6.05    |  |
| Glutaconic acid              | Carbohydrates | Ref.                 | 1.33 (0.57, 3.11)         | 1.19 (0.50, 2.87)         | 0.81 (0.34, 1.98)         | 2.7E-01                                     | 6.2E-01                                | 0.97 (0.55, 1.69)               | 9.0E-01        | 9.5E-01 | 1.0E+00                              | 0.15    |  |
| Glyceric acid                | Carbohydrates | Ref.                 | 0.76 (0.34, 1.67)         | 1.09 (0.50, 2.37)         | 1.32 (0.59, 2.94)         | 3.9E-01                                     | 7.0E-01                                | 1.17 (0.76, 1.80)               | 4.7E-01        | 6.5E-01 | 1.0E+00                              | 1.10    |  |
| Maltose/Lactose              | Carbohydrates | Ref.                 | 0.41 (0.17, 0.97)         | 0.50 (0.20, 1.23)         | 0.36 (0.15, 0.89)         | 7.5E-01                                     | 8.5E-01                                | 0.80 (0.59, 1.09)               | 1.6E-01        | 3.3E-01 | 1.0E+00                              | 2.62    |  |
| N-Acetylneuraminic acid      | Carbohydrates | Ref.                 | 0.91 (0.40, 2.07)         | 0.53 (0.24, 1.17)         | 0.49 (0.21, 1.11)         | 3.0E-01                                     | 6.4E-01                                | 0.54 (0.25, 1.18)               | 1.2E-01        | 2.7E-01 | 1.0E+00                              | 3.03    |  |
| Rhamnose                     | Carbohydrates | Ref.                 | 0.63 (0.25, 1.62)         | 1.48 (0.58, 3.77)         | 2.60 (1.03, 6.59)         | 7.4E-01                                     | 8.5E-01                                | 1.63 (1.16, 2.28)               | 4.5E-03        | 3.5E-02 | 8.5E-01                              | 7.78    |  |
| Tartaric acid                | Carbohydrates | Ref.                 | 0.82 (0.32, 2.06)         | 0.66 (0.25, 1.74)         | 0.80 (0.30, 2.13)         | 6.5E-01                                     | 8.5E-01                                | 0.93 (0.70, 1.25)               | 6.4E-01        | 8.0E-01 | 1.0E+00                              | 0.65    |  |
| Threonic acid                | Carbohydrates | Ref.                 | 0.73 (0.37, 1.46)         | 0.67 (0.31, 1.47)         | 1.02 (0.49, 2.15)         | 4.1E-01                                     | 7.0E-01                                | 0.89 (0.66, 1.20)               | 4.3E-01        | 6.3E-01 | 1.0E+00                              | 1.21    |  |
| Trehalose                    | Carbohydrates | Ref.                 | 1.25 (0.55, 2.82)         | 0.97 (0.37, 2.53)         | 0.75 (0.28, 2.00)         | 4.1E-01                                     | 7.0E-01                                | 0.19 (0.02, 2.14)               | 1.8E-01        | 3.6E-01 | 1.0E+00                              | 2.48    |  |
| Xylose                       | Carbohydrates | Ref.                 | 1.75 (0.75, 4.11)         | 1.90 (0.80, 4.52)         | 1.82 (0.78, 4.22)         | 2.9E-01                                     | 6.4E-01                                | 1.42 (0.91, 2.23)               | 1.3E-01        | 2.8E-01 | 1.0E+00                              | 2.98    |  |
| 2-Methylbutyrylcarnitine     | Carnitines    | Ref.                 | 1.18 (0.53, 2.59)         | 0.59 (0.24, 1.41)         | 0.84 (0.39, 1.81)         | 4.7E-01                                     | 7.4E-01                                | 0.85 (0.55, 1.32)               | 4.7E-01        | 6.5E-01 | 1.0E+00                              | 1.08    |  |
| 3-Hydroxyisovalerylcarnitine | Carnitines    | Ref.                 | 1.19 (0.51, 2.79)         | 0.57 (0.22, 1.49)         | 0.63 (0.26, 1.53)         | 6.8E-01                                     | 8.5E-01                                | 0.56 (0.30, 1.03)               | 6.4E-02        | 1.9E-01 | 1.0E+00                              | 3.96    |  |
| Acetylcarnitine              | Carnitines    | Ref.                 | 1.93 (0.85, 4.38)         | 2.17 (0.93, 5.11)         | 2.82 (1.26, 6.28)         | 4.8E-01                                     | 7.4E-01                                | 2.55 (1.45, 4.49)               | 1.2E-03        | 1.6E-02 | 2.2E-01                              | 9.73    |  |
| Adipoylcarnitine             | Carnitines    | Ref.                 | 0.81 (0.33, 1.96)         | 1.33 (0.53, 3.33)         | 1.09 (0.50, 2.40)         | 7.0E-01                                     | 8.5E-01                                | 1.28 (0.68, 2.41)               | 4.4E-01        | 6.3E-01 | 1.0E+00                              | 1.19    |  |
| Carnitine                    | Carnitines    | Ref.                 | 1.25 (0.58, 2.69)         | 1.46 (0.69, 3.09)         | 0.86 (0.40, 1.85)         | 6.5E-01                                     | 8.5E-01                                | 1.19 (0.47, 3.00)               | 7.1E-01        | 8.6E-01 | 1.0E+00                              | 0.48    |  |

| Metabolite                     | Class       | Categorical analysis |                           |                           |                           |                                             |                                        | Continuous analysis             |                |         |                                      |         |  |
|--------------------------------|-------------|----------------------|---------------------------|---------------------------|---------------------------|---------------------------------------------|----------------------------------------|---------------------------------|----------------|---------|--------------------------------------|---------|--|
|                                |             | Q1                   | OR <sub>Q2</sub> (95% CI) | OR <sub>Q3</sub> (95% CI) | OR <sub>Q4</sub> (95% CI) | <i>P</i> <sub>non-linear</sub> <sup>b</sup> | FDR <sub>non-linear</sub> <sup>b</sup> | OR <sub>doubling</sub> (95% CI) | <i>P</i> value | FDR     | <i>P</i> <sub>Bon</sub> <sup>c</sup> | S value |  |
| Decanoylcarnitine              | Carnitines  | Ref.                 | 0.96 (0.42, 2.18)         | 1.03 (0.44, 2.42)         | 2.38 (1.00, 5.66)         | 1.7E-01                                     | 5.2E-01                                | 1.45 (0.99, 2.13)               | 5.6E-02        | 1.8E-01 | 1.0E+00                              | 4.17    |  |
| Glutaryl carnitine             | Carnitines  | Ref.                 | 0.92 (0.43, 1.99)         | 0.80 (0.37, 1.73)         | 0.95 (0.43, 2.10)         | 4.9E-01                                     | 7.4E-01                                | 0.93 (0.39, 2.21)               | 8.7E-01        | 9.4E-01 | 1.0E+00                              | 0.20    |  |
| Hexanoylcarnitine              | Carnitines  | Ref.                 | 0.75 (0.30, 1.86)         | 1.21 (0.49, 2.98)         | 2.52 (1.07, 5.92)         | 1.5E-02                                     | 2.6E-01                                | 1.31 (1.00, 1.72)               | 4.8E-02        | 1.6E-01 | 1.0E+00                              | 4.39    |  |
| Isovelarylcarnitine            | Carnitines  | Ref.                 | 1.14 (0.52, 2.50)         | 0.86 (0.38, 1.95)         | 0.57 (0.25, 1.27)         | 7.6E-01                                     | 8.5E-01                                | 0.79 (0.48, 1.28)               | 3.4E-01        | 5.3E-01 | 1.0E+00                              | 1.58    |  |
| Lauroyl carnitine              | Carnitines  | Ref.                 | 0.70 (0.27, 1.81)         | 0.99 (0.40, 2.45)         | 2.47 (1.00, 6.12)         | 7.2E-02                                     | 4.7E-01                                | 1.27 (0.95, 1.70)               | 1.1E-01        | 2.6E-01 | 1.0E+00                              | 3.23    |  |
| Linoleyl carnitine             | Carnitines  | Ref.                 | 0.95 (0.43, 2.10)         | 1.01 (0.44, 2.35)         | 1.93 (0.76, 4.93)         | 1.6E-01                                     | 5.2E-01                                | 1.44 (0.84, 2.47)               | 1.9E-01        | 3.7E-01 | 1.0E+00                              | 2.41    |  |
| Malonylcarnitine               | Carnitines  | Ref.                 | 0.45 (0.18, 1.12)         | 0.72 (0.31, 1.70)         | 0.56 (0.25, 1.25)         | 5.0E-01                                     | 7.4E-01                                | 0.83 (0.65, 1.05)               | 1.2E-01        | 2.7E-01 | 1.0E+00                              | 3.04    |  |
| Myristoylcarnitine             | Carnitines  | Ref.                 | 1.13 (0.42, 3.05)         | 2.76 (0.94, 8.10)         | 4.11 (1.60, 10.60)        | 7.4E-01                                     | 8.5E-01                                | 3.24 (1.56, 6.72)               | 1.6E-03        | 1.9E-02 | 3.0E-01                              | 9.30    |  |
| Octanoylcarnitine              | Carnitines  | Ref.                 | 0.58 (0.26, 1.27)         | 1.26 (0.56, 2.82)         | 1.76 (0.78, 3.99)         | 1.5E-01                                     | 5.2E-01                                | 1.52 (1.04, 2.20)               | 2.9E-02        | 1.2E-01 | 1.0E+00                              | 5.10    |  |
| Oleoylcarnitine                | Carnitines  | Ref.                 | 0.84 (0.35, 2.04)         | 2.47 (0.95, 6.40)         | 4.14 (1.60, 10.69)        | 5.6E-03                                     | 1.3E-01                                | 2.32 (1.30, 4.14)               | 4.5E-03        | 3.5E-02 | 8.3E-01                              | 7.81    |  |
| Palmitoylcarnitine             | Carnitines  | Ref.                 | 0.96 (0.41, 2.26)         | 1.88 (0.78, 4.51)         | 2.87 (1.17, 7.06)         | 9.5E-02                                     | 4.9E-01                                | 1.76 (0.92, 3.38)               | 8.9E-02        | 2.4E-01 | 1.0E+00                              | 3.49    |  |
| Propionyl carnitine            | Carnitines  | Ref.                 | 1.56 (0.71, 3.40)         | 1.29 (0.59, 2.81)         | 1.35 (0.63, 2.90)         | 6.6E-01                                     | 8.5E-01                                | 1.35 (0.74, 2.46)               | 3.2E-01        | 5.2E-01 | 1.0E+00                              | 1.63    |  |
| Stearyl carnitine              | Carnitines  | Ref.                 | 1.05 (0.46, 2.39)         | 1.60 (0.71, 3.60)         | 3.37 (1.43, 7.97)         | 2.7E-01                                     | 6.2E-01                                | 1.94 (1.27, 2.97)               | 2.3E-03        | 2.2E-02 | 4.4E-01                              | 8.74    |  |
| 10Z-Heptadecenoic acid         | Fatty acids | Ref.                 | 1.46 (0.62, 3.44)         | 1.31 (0.58, 3.00)         | 3.35 (1.49, 7.51)         | 4.3E-01                                     | 7.1E-01                                | 1.39 (1.12, 1.73)               | 3.1E-03        | 2.7E-02 | 5.7E-01                              | 8.34    |  |
| 12-Hydroxystearic acid         | Fatty acids | Ref.                 | 0.68 (0.32, 1.44)         | 0.46 (0.18, 1.18)         | 0.33 (0.13, 0.85)         | 3.8E-01                                     | 7.0E-01                                | 0.41 (0.19, 0.86)               | 1.8E-02        | 8.2E-02 | 1.0E+00                              | 5.79    |  |
| 2-Hydroxy-3-methylbutyric acid | Fatty acids | Ref.                 | 1.36 (0.58, 3.17)         | 0.71 (0.33, 1.53)         | 1.22 (0.55, 2.68)         | 2.4E-03                                     | 1.2E-01                                | 1.44 (1.03, 2.01)               | 3.2E-02        | 1.2E-01 | 1.0E+00                              | 4.97    |  |
| 2,2-Dimethyladipic acid        | Fatty acids | Ref.                 | 0.89 (0.44, 1.83)         | 0.46 (0.20, 1.09)         | 0.93 (0.38, 2.27)         | 8.5E-01                                     | 9.1E-01                                | 0.94 (0.80, 1.10)               | 4.1E-01        | 6.0E-01 | 1.0E+00                              | 1.29    |  |
| 3-Methyladipic acid            | Fatty acids | Ref.                 | 1.06 (0.47, 2.37)         | 0.71 (0.31, 1.63)         | 0.41 (0.18, 0.96)         | 4.6E-02                                     | 3.9E-01                                | 0.89 (0.73, 1.09)               | 2.5E-01        | 4.4E-01 | 1.0E+00                              | 2.01    |  |
| 5-Dodecenoic acid              | Fatty acids | Ref.                 | 1.06 (0.44, 2.55)         | 1.23 (0.52, 2.92)         | 2.76 (1.19, 6.44)         | 3.9E-01                                     | 7.0E-01                                | 1.53 (1.10, 2.13)               | 1.1E-02        | 6.1E-02 | 1.0E+00                              | 6.55    |  |
| 8,11,14-Eicosatrienoic acid    | Fatty acids | Ref.                 | 0.76 (0.35, 1.66)         | 0.97 (0.48, 1.99)         | 1.31 (0.62, 2.79)         | 3.4E-02                                     | 3.5E-01                                | 1.14 (0.88, 1.47)               | 3.2E-01        | 5.1E-01 | 1.0E+00                              | 1.66    |  |
| Adrenic acid                   | Fatty acids | Ref.                 | 1.20 (0.57, 2.52)         | 1.68 (0.74, 3.83)         | 2.58 (1.07, 6.21)         | 3.8E-01                                     | 7.0E-01                                | 1.43 (1.06, 1.92)               | 1.7E-02        | 8.1E-02 | 1.0E+00                              | 5.85    |  |
| alpha-Linolenic acid           | Fatty acids | Ref.                 | 0.79 (0.38, 1.66)         | 1.72 (0.78, 3.82)         | 1.55 (0.70, 3.42)         | 8.5E-02                                     | 4.8E-01                                | 1.11 (0.88, 1.40)               | 3.6E-01        | 5.6E-01 | 1.0E+00                              | 1.46    |  |
| Arachidonic acid               | Fatty acids | Ref.                 | 0.44 (0.22, 0.90)         | 0.52 (0.23, 1.19)         | 0.66 (0.31, 1.45)         | 8.4E-05                                     | 1.6E-02                                | 0.65 (0.42, 1.02)               | 5.9E-02        | 1.8E-01 | 1.0E+00                              | 4.07    |  |
| Decanoic acid                  | Fatty acids | Ref.                 | 0.81 (0.32, 2.04)         | 2.10 (0.81, 5.45)         | 2.47 (0.99, 6.17)         | 6.6E-01                                     | 8.5E-01                                | 1.34 (1.02, 1.75)               | 3.5E-02        | 1.3E-01 | 1.0E+00                              | 4.82    |  |
| DHA                            | Fatty acids | Ref.                 | 0.80 (0.35, 1.83)         | 0.66 (0.29, 1.47)         | 0.77 (0.31, 1.92)         | 3.7E-03                                     | 1.2E-01                                | 0.73 (0.53, 1.01)               | 5.8E-02        | 1.8E-01 | 1.0E+00                              | 4.10    |  |
| Dodecanoic acid                | Fatty acids | Ref.                 | 1.38 (0.61, 3.10)         | 1.34 (0.61, 2.96)         | 0.99 (0.43, 2.29)         | 4.3E-01                                     | 7.1E-01                                | 0.97 (0.81, 1.18)               | 7.8E-01        | 9.1E-01 | 1.0E+00                              | 0.36    |  |
| DPA <sub>n</sub> -3            | Fatty acids | Ref.                 | 0.92 (0.42, 2.01)         | 0.69 (0.32, 1.51)         | 1.31 (0.56, 3.06)         | 6.6E-03                                     | 1.4E-01                                | 1.03 (0.76, 1.38)               | 8.5E-01        | 9.3E-01 | 1.0E+00                              | 0.23    |  |
| DPA <sub>n</sub> -6            | Fatty acids | Ref.                 | 1.15 (0.52, 2.52)         | 1.00 (0.45, 2.23)         | 1.60 (0.71, 3.60)         | 7.0E-02                                     | 4.7E-01                                | 1.01 (0.77, 1.32)               | 9.7E-01        | 9.7E-01 | 1.0E+00                              | 0.05    |  |
| EPA                            | Fatty acids | Ref.                 | 1.42 (0.65, 3.12)         | 0.49 (0.20, 1.17)         | 0.63 (0.28, 1.42)         | 9.0E-01                                     | 9.3E-01                                | 0.81 (0.64, 1.03)               | 8.9E-02        | 2.4E-01 | 1.0E+00                              | 3.49    |  |

| Metabolite                   | Class         | Categorical analysis |                           |                           |                           |                                             |                                        | Continuous analysis             |                |         |                                      |         |
|------------------------------|---------------|----------------------|---------------------------|---------------------------|---------------------------|---------------------------------------------|----------------------------------------|---------------------------------|----------------|---------|--------------------------------------|---------|
|                              |               | Q1                   | OR <sub>Q2</sub> (95% CI) | OR <sub>Q3</sub> (95% CI) | OR <sub>Q4</sub> (95% CI) | <i>P</i> <sub>non-linear</sub> <sup>b</sup> | FDR <sub>non-linear</sub> <sup>b</sup> | OR <sub>doubling</sub> (95% CI) | <i>P</i> value | FDR     | <i>P</i> <sub>Bon</sub> <sup>c</sup> | S value |
| gamma-Linolenic acid         | Fatty acids   | Ref.                 | 1.19 (0.56, 2.52)         | 1.22 (0.57, 2.60)         | 1.53 (0.67, 3.49)         | 3.6E-01                                     | 7.0E-01                                | 1.06 (0.84, 1.34)               | 6.2E-01        | 7.8E-01 | 1.0E+00                              | 0.69    |
| Heptadecanoic acid           | Fatty acids   | Ref.                 | 0.53 (0.23, 1.20)         | 0.76 (0.35, 1.66)         | 0.90 (0.38, 2.10)         | 1.5E-01                                     | 5.2E-01                                | 0.94 (0.62, 1.44)               | 7.9E-01        | 9.1E-01 | 1.0E+00                              | 0.34    |
| Heptanoic acid               | Fatty acids   | Ref.                 | 1.33 (0.61, 2.89)         | 0.96 (0.37, 2.50)         | 0.69 (0.25, 1.87)         | 7.6E-01                                     | 8.6E-01                                | 0.71 (0.32, 1.56)               | 3.9E-01        | 5.9E-01 | 1.0E+00                              | 1.34    |
| Linoleic acid                | Fatty acids   | Ref.                 | 0.68 (0.33, 1.39)         | 1.39 (0.65, 2.93)         | 1.22 (0.55, 2.71)         | 9.2E-02                                     | 4.9E-01                                | 1.15 (0.83, 1.59)               | 3.9E-01        | 5.9E-01 | 1.0E+00                              | 1.35    |
| Methylglutaric acid          | Fatty acids   | Ref.                 | 1.09 (0.41, 2.89)         | 1.64 (0.59, 4.58)         | 1.57 (0.58, 4.26)         | 7.9E-01                                     | 8.6E-01                                | 0.95 (0.63, 1.43)               | 8.0E-01        | 9.2E-01 | 1.0E+00                              | 0.31    |
| Methylmalonic acid           | Fatty acids   | Ref.                 | 1.17 (0.50, 2.73)         | 1.14 (0.45, 2.88)         | 1.43 (0.55, 3.71)         | 1.4E-01                                     | 5.2E-01                                | 1.20 (0.75, 1.91)               | 4.5E-01        | 6.3E-01 | 1.0E+00                              | 1.16    |
| Myristelaidic acid           | Fatty acids   | Ref.                 | 1.04 (0.41, 2.63)         | 2.33 (0.81, 6.71)         | 3.51 (1.30, 9.46)         | 9.6E-01                                     | 9.7E-01                                | 1.32 (1.07, 1.63)               | 9.8E-03        | 6.1E-02 | 1.0E+00                              | 6.67    |
| Myristic acid                | Fatty acids   | Ref.                 | 1.30 (0.59, 2.88)         | 1.50 (0.65, 3.47)         | 1.08 (0.43, 2.72)         | 9.7E-01                                     | 9.8E-01                                | 1.14 (0.63, 2.05)               | 6.7E-01        | 8.1E-01 | 1.0E+00                              | 0.58    |
| Myristoleic acid             | Fatty acids   | Ref.                 | 0.79 (0.37, 1.68)         | 1.50 (0.56, 4.00)         | 2.51 (1.04, 6.04)         | 3.6E-01                                     | 7.0E-01                                | 1.43 (1.07, 1.91)               | 1.6E-02        | 7.4E-02 | 1.0E+00                              | 6.00    |
| Nonanoic acid                | Fatty acids   | Ref.                 | 1.07 (0.47, 2.41)         | 0.57 (0.24, 1.35)         | 1.11 (0.44, 2.79)         | 3.1E-01                                     | 6.7E-01                                | 0.91 (0.73, 1.13)               | 3.9E-01        | 5.9E-01 | 1.0E+00                              | 1.36    |
| Octanoic acid                | Fatty acids   | Ref.                 | 0.62 (0.27, 1.44)         | 0.82 (0.33, 2.04)         | 1.43 (0.63, 3.24)         | 9.4E-01                                     | 9.6E-01                                | 1.74 (0.88, 3.41)               | 1.1E-01        | 2.6E-01 | 1.0E+00                              | 3.18    |
| Oleic acid                   | Fatty acids   | Ref.                 | 1.00 (0.47, 2.11)         | 1.61 (0.76, 3.43)         | 1.89 (0.82, 4.36)         | 1.3E-01                                     | 5.2E-01                                | 1.27 (0.94, 1.72)               | 1.2E-01        | 2.7E-01 | 1.0E+00                              | 3.11    |
| Palmitic acid                | Fatty acids   | Ref.                 | 0.45 (0.21, 1.00)         | 0.65 (0.28, 1.51)         | 0.73 (0.31, 1.74)         | 6.4E-01                                     | 8.5E-01                                | 1.04 (0.40, 2.67)               | 9.4E-01        | 9.6E-01 | 1.0E+00                              | 0.09    |
| Palmitoleic acid             | Fatty acids   | Ref.                 | 0.56 (0.24, 1.34)         | 0.89 (0.40, 2.00)         | 2.24 (0.94, 5.33)         | 3.8E-01                                     | 7.0E-01                                | 1.34 (1.06, 1.70)               | 1.6E-02        | 7.4E-02 | 1.0E+00                              | 6.01    |
| Pentadecanoic acid           | Fatty acids   | Ref.                 | 0.88 (0.42, 1.83)         | 1.51 (0.69, 3.29)         | 1.07 (0.49, 2.38)         | 2.7E-01                                     | 6.2E-01                                | 1.15 (0.76, 1.74)               | 5.1E-01        | 6.7E-01 | 1.0E+00                              | 0.97    |
| Ricinoleic acid              | Fatty acids   | Ref.                 | 0.56 (0.24, 1.32)         | 1.95 (0.76, 5.02)         | 1.59 (0.72, 3.55)         | 6.4E-01                                     | 8.5E-01                                | 1.25 (0.82, 1.91)               | 3.1E-01        | 5.1E-01 | 1.0E+00                              | 1.70    |
| Undecylenic acid             | Fatty acids   | Ref.                 | 0.66 (0.31, 1.39)         | 0.72 (0.31, 1.66)         | 0.94 (0.42, 2.12)         | 1.5E-01                                     | 5.2E-01                                | 0.98 (0.79, 1.20)               | 8.3E-01        | 9.2E-01 | 1.0E+00                              | 0.28    |
| 3-Indolepropionic acid       | Indoles       | Ref.                 | 0.77 (0.37, 1.58)         | 1.21 (0.59, 2.51)         | 0.96 (0.45, 2.04)         | 7.9E-01                                     | 8.6E-01                                | 1.03 (0.91, 1.18)               | 6.2E-01        | 7.8E-01 | 1.0E+00                              | 0.70    |
| Indoleacetic acid            | Indoles       | Ref.                 | 1.20 (0.58, 2.49)         | 0.53 (0.22, 1.29)         | 0.90 (0.41, 1.98)         | 3.3E-01                                     | 6.7E-01                                | 1.02 (0.78, 1.32)               | 9.1E-01        | 9.5E-01 | 1.0E+00                              | 0.13    |
| AMP                          | Nucleotides   | Ref.                 | 0.55 (0.26, 1.16)         | 0.24 (0.10, 0.62)         | 0.37 (0.16, 0.86)         | 5.0E-01                                     | 7.4E-01                                | 0.82 (0.66, 1.03)               | 9.4E-02        | 2.4E-01 | 1.0E+00                              | 3.42    |
| 2-Furoic acid                | Organic acids | Ref.                 | 1.96 (0.84, 4.60)         | 1.57 (0.67, 3.66)         | 2.42 (0.97, 6.08)         | 7.3E-01                                     | 8.5E-01                                | 1.51 (1.06, 2.16)               | 2.3E-02        | 1.0E-01 | 1.0E+00                              | 5.45    |
| 2-Hydroxybutyric acid        | Organic acids | Ref.                 | 0.74 (0.34, 1.61)         | 1.28 (0.59, 2.76)         | 1.94 (0.95, 3.97)         | 3.3E-02                                     | 3.5E-01                                | 1.40 (0.97, 2.00)               | 6.9E-02        | 2.0E-01 | 1.0E+00                              | 3.86    |
| 3-Hydroxybutyric acid        | Organic acids | Ref.                 | 1.23 (0.56, 2.71)         | 0.96 (0.45, 2.08)         | 1.70 (0.73, 3.96)         | 2.2E-01                                     | 6.2E-01                                | 1.23 (0.95, 1.59)               | 1.1E-01        | 2.6E-01 | 1.0E+00                              | 3.19    |
| 3-Methyl-2-oxovaleric acid   | Organic acids | Ref.                 | 2.15 (0.97, 4.76)         | 0.84 (0.33, 2.11)         | 1.89 (0.83, 4.33)         | 2.4E-01                                     | 6.2E-01                                | 1.40 (0.69, 2.84)               | 3.6E-01        | 5.5E-01 | 1.0E+00                              | 1.49    |
| Aconitic acid                | Organic acids | Ref.                 | 1.14 (0.40, 3.26)         | 3.53 (1.22, 10.22)        | 3.74 (1.26, 11.06)        | 7.6E-01                                     | 8.5E-01                                | 6.89 (2.57, 18.43)              | 1.2E-04        | 2.8E-03 | 2.3E-02                              | 13.01   |
| Adipic acid                  | Organic acids | Ref.                 | 0.67 (0.31, 1.47)         | 1.09 (0.50, 2.40)         | 0.80 (0.34, 1.89)         | 7.3E-01                                     | 8.5E-01                                | 0.86 (0.66, 1.13)               | 2.9E-01        | 5.0E-01 | 1.0E+00                              | 1.79    |
| alpha-Hydroxyisobutyric acid | Organic acids | Ref.                 | 0.62 (0.27, 1.38)         | 0.78 (0.36, 1.72)         | 1.25 (0.57, 2.73)         | 2.4E-01                                     | 6.2E-01                                | 0.98 (0.74, 1.30)               | 8.9E-01        | 9.5E-01 | 1.0E+00                              | 0.16    |
| alpha-Ketoisovaleric acid    | Organic acids | Ref.                 | 1.66 (0.77, 3.58)         | 1.74 (0.81, 3.75)         | 1.64 (0.74, 3.60)         | 2.6E-02                                     | 3.4E-01                                | 0.93 (0.53, 1.63)               | 8.0E-01        | 9.2E-01 | 1.0E+00                              | 0.32    |
| Azelaic acid                 | Organic acids | Ref.                 | 0.96 (0.46, 2.02)         | 1.04 (0.47, 2.30)         | 1.26 (0.57, 2.80)         | 1.9E-01                                     | 5.6E-01                                | 1.16 (0.80, 1.68)               | 4.4E-01        | 6.3E-01 | 1.0E+00                              | 1.19    |

| Metabolite                       | Class                 | Categorical analysis |                           |                           |                           |                           |                              | Continuous analysis             |           |         |                    |         |  |
|----------------------------------|-----------------------|----------------------|---------------------------|---------------------------|---------------------------|---------------------------|------------------------------|---------------------------------|-----------|---------|--------------------|---------|--|
|                                  |                       | Q1                   | OR <sub>Q2</sub> (95% CI) | OR <sub>Q3</sub> (95% CI) | OR <sub>Q4</sub> (95% CI) | $P_{\text{non-linear}}^b$ | FDR <sub>non-linear}^b</sub> | OR <sub>doubling</sub> (95% CI) | $P$ value | FDR     | $P_{\text{Bon}}^c$ | S value |  |
| Benzoic acid                     | Organic acids         | Ref.                 | 1.29 (0.57, 2.93)         | 0.87 (0.34, 2.21)         | 1.18 (0.47, 2.98)         | 2.3E-01                   | 6.2E-01                      | 7.30 (0.96, 55.32)              | 5.4E-02   | 1.7E-01 | 1.0E+00            | 4.20    |  |
| Citramalic acid                  | Organic acids         | Ref.                 | 0.48 (0.21, 1.13)         | 1.07 (0.48, 2.41)         | 0.82 (0.38, 1.76)         | 7.8E-01                   | 8.6E-01                      | 1.04 (0.73, 1.49)               | 8.3E-01   | 9.2E-01 | 1.0E+00            | 0.27    |  |
| Citric acid                      | Organic acids         | Ref.                 | 1.10 (0.43, 2.83)         | 1.70 (0.60, 4.80)         | 5.33 (1.94, 14.66)        | 2.5E-01                   | 6.2E-01                      | 12.86 (4.10, 40.30)             | 1.2E-05   | 3.6E-04 | 2.2E-03            | 16.37   |  |
| Erythronic acid                  | Organic acids         | Ref.                 | 1.09 (0.53, 2.21)         | 0.66 (0.31, 1.43)         | 0.95 (0.46, 1.98)         | 5.2E-01                   | 7.4E-01                      | 0.87 (0.59, 1.30)               | 5.1E-01   | 6.7E-01 | 1.0E+00            | 0.98    |  |
| Fumaric acid                     | Organic acids         | Ref.                 | 1.66 (0.76, 3.63)         | 1.80 (0.82, 3.99)         | 2.20 (0.95, 5.06)         | 4.7E-02                   | 3.9E-01                      | 1.12 (0.83, 1.52)               | 4.7E-01   | 6.5E-01 | 1.0E+00            | 1.09    |  |
| Glutaric acid                    | Organic acids         | Ref.                 | 1.21 (0.47, 3.13)         | 0.89 (0.37, 2.18)         | 3.05 (1.37, 6.80)         | 4.7E-03                   | 1.2E-01                      | 1.11 (1.00, 1.23)               | 5.1E-02   | 1.7E-01 | 1.0E+00            | 4.29    |  |
| Glycolic acid                    | Organic acids         | Ref.                 | 0.87 (0.36, 2.08)         | 1.26 (0.52, 3.04)         | 1.31 (0.58, 2.99)         | 6.8E-01                   | 8.5E-01                      | 2.42 (1.10, 5.33)               | 2.9E-02   | 1.2E-01 | 1.0E+00            | 5.13    |  |
| Guanidoacetic acid               | Organic acids         | Ref.                 | 0.92 (0.42, 2.03)         | 0.47 (0.20, 1.09)         | 1.14 (0.53, 2.46)         | 5.4E-02                   | 4.2E-01                      | 1.28 (0.63, 2.57)               | 4.9E-01   | 6.6E-01 | 1.0E+00            | 1.02    |  |
| Isocitric acid                   | Organic acids         | Ref.                 | 2.36 (0.77, 7.24)         | 3.10 (1.11, 8.67)         | 9.22 (3.06, 27.83)        | 8.7E-01                   | 9.2E-01                      | 6.45 (2.98, 14.00)              | 2.3E-06   | 1.1E-04 | 4.4E-04            | 18.70   |  |
| Ketoleucine                      | Organic acids         | Ref.                 | 0.84 (0.39, 1.82)         | 0.91 (0.41, 2.00)         | 1.07 (0.49, 2.33)         | 1.4E-01                   | 5.2E-01                      | 1.01 (0.52, 1.97)               | 9.7E-01   | 9.7E-01 | 1.0E+00            | 0.04    |  |
| Lactic acid                      | Organic acids         | Ref.                 | 1.10 (0.55, 2.20)         | 0.42 (0.17, 1.02)         | 0.63 (0.27, 1.50)         | 8.8E-01                   | 9.2E-01                      | 0.81 (0.39, 1.66)               | 5.6E-01   | 7.3E-01 | 1.0E+00            | 0.83    |  |
| Maleic acid                      | Organic acids         | Ref.                 | 1.08 (0.48, 2.40)         | 1.39 (0.61, 3.17)         | 1.38 (0.64, 2.99)         | 3.2E-01                   | 6.7E-01                      | 1.15 (0.83, 1.59)               | 3.9E-01   | 5.9E-01 | 1.0E+00            | 1.34    |  |
| Malic acid                       | Organic acids         | Ref.                 | 1.27 (0.50, 3.24)         | 1.05 (0.42, 2.66)         | 4.33 (1.68, 11.15)        | 4.8E-01                   | 7.4E-01                      | 1.86 (1.15, 2.99)               | 1.1E-02   | 6.1E-02 | 1.0E+00            | 6.53    |  |
| Malonic acid                     | Organic acids         | Ref.                 | 0.59 (0.27, 1.28)         | 0.83 (0.38, 1.83)         | 0.99 (0.46, 2.14)         | 7.9E-01                   | 8.6E-01                      | 0.87 (0.70, 1.10)               | 2.5E-01   | 4.4E-01 | 1.0E+00            | 2.01    |  |
| Methylsuccinic acid              | Organic acids         | Ref.                 | 0.93 (0.38, 2.28)         | 1.24 (0.51, 3.01)         | 2.32 (0.98, 5.52)         | 7.9E-02                   | 4.7E-01                      | 1.29 (1.06, 1.57)               | 1.1E-02   | 6.1E-02 | 1.0E+00            | 6.55    |  |
| Oxalic acid                      | Organic acids         | Ref.                 | 1.29 (0.60, 2.78)         | 1.13 (0.50, 2.58)         | 1.50 (0.61, 3.69)         | 2.5E-01                   | 6.2E-01                      | 0.95 (0.63, 1.43)               | 8.1E-01   | 9.2E-01 | 1.0E+00            | 0.31    |  |
| Oxoadipic acid                   | Organic acids         | Ref.                 | 0.67 (0.25, 1.78)         | 0.91 (0.38, 2.17)         | 1.30 (0.60, 2.83)         | 8.7E-01                   | 9.2E-01                      | 0.93 (0.67, 1.30)               | 6.7E-01   | 8.1E-01 | 1.0E+00            | 0.58    |  |
| Oxoglutaric acid                 | Organic acids         | Ref.                 | 1.41 (0.64, 3.08)         | 2.20 (0.99, 4.90)         | 4.67 (1.91, 11.40)        | 3.3E-03                   | 1.2E-01                      | 1.65 (1.11, 2.43)               | 1.2E-02   | 6.6E-02 | 1.0E+00            | 6.32    |  |
| Petroselinic acid                | Organic acids         | Ref.                 | 0.72 (0.33, 1.55)         | 1.56 (0.75, 3.27)         | 1.81 (0.80, 4.10)         | 1.6E-01                   | 5.2E-01                      | 1.30 (0.95, 1.80)               | 1.1E-01   | 2.6E-01 | 1.0E+00            | 3.24    |  |
| Pimelic acid                     | Organic acids         | Ref.                 | 0.50 (0.21, 1.19)         | 0.34 (0.13, 0.88)         | 0.67 (0.30, 1.49)         | 4.0E-01                   | 7.0E-01                      | 0.97 (0.79, 1.19)               | 7.6E-01   | 9.0E-01 | 1.0E+00            | 0.40    |  |
| Pyruvic acid                     | Organic acids         | Ref.                 | 0.75 (0.36, 1.57)         | 1.01 (0.48, 2.12)         | 1.26 (0.54, 2.93)         | 3.8E-02                   | 3.5E-01                      | 0.90 (0.64, 1.26)               | 5.4E-01   | 7.1E-01 | 1.0E+00            | 0.88    |  |
| Succinic acid                    | Organic acids         | Ref.                 | 1.23 (0.50, 3.08)         | 0.90 (0.33, 2.43)         | 1.46 (0.52, 4.10)         | 9.5E-01                   | 9.6E-01                      | 1.71 (0.79, 3.70)               | 1.7E-01   | 3.4E-01 | 1.0E+00            | 2.56    |  |
| 4-Hydroxyphenylpyruvic acid      | Phenols               | Ref.                 | 0.94 (0.43, 2.09)         | 1.07 (0.47, 2.45)         | 1.00 (0.45, 2.21)         | 6.0E-01                   | 8.2E-01                      | 1.03 (0.78, 1.35)               | 8.5E-01   | 9.3E-01 | 1.0E+00            | 0.23    |  |
| Homovanillic acid                | Phenols               | Ref.                 | 1.32 (0.54, 3.23)         | 1.88 (0.68, 5.21)         | 3.78 (1.48, 9.71)         | 1.9E-01                   | 5.6E-01                      | 3.19 (1.71, 5.98)               | 2.8E-04   | 4.8E-03 | 5.3E-02            | 11.78   |  |
| p-Hydroxyphenylacetic acid       | Phenols               | Ref.                 | 1.74 (0.81, 3.76)         | 1.29 (0.57, 2.90)         | 1.62 (0.69, 3.82)         | 7.5E-01                   | 8.5E-01                      | 1.01 (0.85, 1.21)               | 8.9E-01   | 9.5E-01 | 1.0E+00            | 0.18    |  |
| 2-Phenylpropionate               | Phenylpropanoic acids | Ref.                 | 2.75 (1.14, 6.61)         | 1.49 (0.67, 3.35)         | 1.68 (0.73, 3.87)         | 3.8E-01                   | 7.0E-01                      | 1.04 (0.87, 1.25)               | 6.7E-01   | 8.1E-01 | 1.0E+00            | 0.58    |  |
| 3-Hydroxyphenylhydraacrylic acid | Phenylpropanoic acids | Ref.                 | 0.72 (0.31, 1.70)         | 0.93 (0.37, 2.30)         | 0.44 (0.18, 1.11)         | 3.3E-01                   | 6.7E-01                      | 0.84 (0.67, 1.05)               | 1.3E-01   | 2.9E-01 | 1.0E+00            | 2.89    |  |
| Hydrocinnamic acid               | Phenylpropanoic acids | Ref.                 | 0.82 (0.33, 2.03)         | 1.18 (0.52, 2.70)         | 0.79 (0.33, 1.89)         | 2.7E-01                   | 6.2E-01                      | 1.05 (0.87, 1.25)               | 6.2E-01   | 7.8E-01 | 1.0E+00            | 0.69    |  |
| Hydroxyphenyllactic acid         | Phenylpropanoic acids | Ref.                 | 0.28 (0.10, 0.83)         | 0.75 (0.31, 1.85)         | 1.68 (0.69, 4.10)         | 4.6E-03                   | 1.2E-01                      | 2.11 (1.31, 3.41)               | 2.3E-03   | 2.2E-02 | 4.2E-01            | 8.79    |  |

| Metabolite               | Class                 | Categorical analysis |                           |                           |                           |                                             |                                        | Continuous analysis             |                |         |                                      |         |
|--------------------------|-----------------------|----------------------|---------------------------|---------------------------|---------------------------|---------------------------------------------|----------------------------------------|---------------------------------|----------------|---------|--------------------------------------|---------|
|                          |                       | Q1                   | OR <sub>Q2</sub> (95% CI) | OR <sub>Q3</sub> (95% CI) | OR <sub>Q4</sub> (95% CI) | <i>P</i> <sub>non-linear</sub> <sup>b</sup> | FDR <sub>non-linear</sub> <sup>b</sup> | OR <sub>doubling</sub> (95% CI) | <i>P</i> value | FDR     | <i>P</i> <sub>Bon</sub> <sup>c</sup> | S value |
| Phenyllactic acid        | Phenylpropanoic acids | Ref.                 | 0.52 (0.22, 1.22)         | 0.77 (0.33, 1.80)         | 1.56 (0.69, 3.53)         | 1.6E-01                                     | 5.2E-01                                | 1.53 (1.01, 2.30)               | 4.3E-02        | 1.5E-01 | 1.0E+00                              | 4.53    |
| N-Methylnicotinamide     | Pyridines             | Ref.                 | 0.61 (0.27, 1.41)         | 1.64 (0.76, 3.51)         | 1.39 (0.65, 2.94)         | 5.2E-01                                     | 7.4E-01                                | 1.26 (1.01, 1.56)               | 4.0E-02        | 1.4E-01 | 1.0E+00                              | 4.65    |
| 3-Hydroxyisovaleric acid | SCFAs                 | Ref.                 | 0.74 (0.35, 1.54)         | 0.74 (0.34, 1.57)         | 1.56 (0.70, 3.51)         | 1.4E-01                                     | 5.2E-01                                | 1.20 (0.71, 2.04)               | 4.9E-01        | 6.6E-01 | 1.0E+00                              | 1.02    |
| Acetic acid              | SCFAs                 | Ref.                 | 1.38 (0.59, 3.21)         | 1.51 (0.64, 3.59)         | 2.14 (0.91, 5.04)         | 9.2E-02                                     | 4.9E-01                                | 1.30 (0.96, 1.78)               | 9.5E-02        | 2.4E-01 | 1.0E+00                              | 3.40    |
| Butyric acid             | SCFAs                 | Ref.                 | 2.76 (1.03, 7.43)         | 6.79 (1.95, 23.66)        | 6.49 (1.59, 26.48)        | 8.0E-01                                     | 8.7E-01                                | 4.17 (1.84, 9.46)               | 6.3E-04        | 9.8E-03 | 1.2E-01                              | 10.63   |
| Caproic acid             | SCFAs                 | Ref.                 | 0.99 (0.41, 2.39)         | 1.27 (0.48, 3.35)         | 1.82 (0.62, 5.32)         | 5.7E-01                                     | 8.0E-01                                | 1.60 (0.66, 3.89)               | 3.0E-01        | 5.0E-01 | 1.0E+00                              | 1.75    |
| Ethylmethylacetic acid   | SCFAs                 | Ref.                 | 2.87 (1.13, 7.28)         | 2.87 (1.05, 7.85)         | 3.48 (1.24, 9.78)         | 6.1E-01                                     | 8.3E-01                                | 2.10 (1.23, 3.60)               | 6.9E-03        | 4.6E-02 | 1.0E+00                              | 7.19    |
| Formic acid              | SCFAs                 | Ref.                 | 1.27 (0.54, 2.98)         | 1.59 (0.71, 3.55)         | 2.22 (0.89, 5.50)         | 8.6E-02                                     | 4.8E-01                                | 1.57 (0.88, 2.78)               | 1.2E-01        | 2.8E-01 | 1.0E+00                              | 3.01    |
| Isobutyric acid          | SCFAs                 | Ref.                 | 0.38 (0.16, 0.89)         | 1.06 (0.45, 2.52)         | 0.61 (0.23, 1.64)         | 5.6E-02                                     | 4.2E-01                                | 1.29 (0.62, 2.68)               | 4.9E-01        | 6.6E-01 | 1.0E+00                              | 1.03    |
| Isocaproic acid          | SCFAs                 | Ref.                 | 1.32 (0.57, 3.03)         | 0.78 (0.36, 1.69)         | 0.81 (0.37, 1.77)         | 3.2E-01                                     | 6.7E-01                                | 0.71 (0.46, 1.10)               | 1.2E-01        | 2.7E-01 | 1.0E+00                              | 3.05    |
| Isovaleric acid          | SCFAs                 | Ref.                 | 0.79 (0.37, 1.72)         | 0.79 (0.35, 1.75)         | 1.76 (0.74, 4.14)         | 2.2E-01                                     | 6.2E-01                                | 1.45 (1.04, 2.03)               | 3.0E-02        | 1.2E-01 | 1.0E+00                              | 5.08    |
| Pentanoic acid           | SCFAs                 | Ref.                 | 1.17 (0.50, 2.72)         | 1.06 (0.42, 2.70)         | 0.98 (0.39, 2.46)         | 2.9E-01                                     | 6.4E-01                                | 0.99 (0.66, 1.48)               | 9.4E-01        | 9.6E-01 | 1.0E+00                              | 0.08    |
| Propanoic acid           | SCFAs                 | Ref.                 | 1.44 (0.58, 3.53)         | 3.47 (1.33, 9.01)         | 5.98 (2.01, 17.79)        | 1.2E-01                                     | 5.2E-01                                | 6.80 (2.20, 21.05)              | 8.8E-04        | 1.3E-02 | 1.6E-01                              | 10.15   |

a Conditioned on matching factors and adjusted for age, cigarette smoking, alcohol drinking, BMI, physical activity, CHFP score, medical history of hepatitis and cirrhosis, medical history of cholelithiasis and medical history of T2DM.

b Log<sub>2</sub>-transformed metabolite concentrations was fitted with a 3-knots restricted cubic spline (10<sup>th</sup>, 50<sup>th</sup>, and 90<sup>th</sup> percentile).

c Bonferroni corrected *P* values.

Supplementary Table ST5 Association between selected metabolites and liver cancer risk after excluding participants with a follow-up time of less than 2 years

| Metabolite               | Class                 | OR <sub>doubling</sub> (95% CI) | <i>P</i> value | FDR     | <i>P</i> <sub>Bon</sub> <sup>b</sup> |
|--------------------------|-----------------------|---------------------------------|----------------|---------|--------------------------------------|
| beta-Alanine             | Amino acids           | 0.85 (0.70, 1.04)               | 0.12           | 0.12    | 1.0                                  |
| Creatine                 | Amino acids           | 0.53 (0.37, 0.75)               | 0.00033        | 0.00066 | 0.0093                               |
| Lysine                   | Amino acids           | 0.32 (0.16, 0.63)               | 0.00093        | 0.0017  | 0.026                                |
| Pipecolic acid           | Amino acids           | 2.06 (1.40, 3.03)               | 0.00025        | 0.00054 | 0.0070                               |
| Tyrosine                 | Amino acids           | 4.37 (2.34, 8.16)               | <0.0001        | <0.0001 | 0.0001                               |
| GCA                      | Bile acids            | 1.54 (1.33, 1.79)               | <0.0001        | <0.0001 | <0.0001                              |
| GCDCA                    | Bile acids            | 1.70 (1.42, 2.04)               | <0.0001        | <0.0001 | <0.0001                              |
| GHCA                     | Bile acids            | 1.53 (1.18, 1.97)               | 0.0012         | 0.0020  | 0.032                                |
| GUDCA                    | Bile acids            | 1.25 (1.08, 1.44)               | 0.0023         | 0.0032  | 0.063                                |
| TCA                      | Bile acids            | 1.67 (1.42, 1.96)               | <0.0001        | <0.0001 | <0.0001                              |
| TCDCA                    | Bile acids            | 1.69 (1.44, 1.98)               | <0.0001        | <0.0001 | <0.0001                              |
| TDCA                     | Bile acids            | 1.41 (1.20, 1.66)               | <0.0001        | 0.00011 | 0.001                                |
| D-Xylulose               | Carbohydrates         | 2.28 (1.33, 3.90)               | 0.0026         | 0.0035  | 0.074                                |
| Fructose                 | Carbohydrates         | 1.27 (1.07, 1.50)               | 0.0057         | 0.0067  | 0.16                                 |
| Rhamnose                 | Carbohydrates         | 1.57 (1.25, 1.97)               | <0.0001        | 0.00028 | 0.0028                               |
| Acetylcarnitine          | Carnitines            | 2.29 (1.47, 3.57)               | 0.00024        | 0.00054 | 0.0069                               |
| Myristoylcarnitine       | Carnitines            | 2.30 (1.33, 3.98)               | 0.0030         | 0.0038  | 0.084                                |
| Oleylcarnitine           | Carnitines            | 1.73 (1.18, 2.55)               | 0.0054         | 0.0066  | 0.15                                 |
| Stearyl carnitine        | Carnitines            | 1.55 (1.18, 2.06)               | 0.0020         | 0.0029  | 0.055                                |
| 10Z-Heptadecenoic acid   | Fatty acids           | 1.24 (1.04, 1.48)               | 0.019          | 0.020   | 0.53                                 |
| Aconitic acid            | Organic acids         | 2.76 (1.46, 5.24)               | 0.0018         | 0.0029  | 0.052                                |
| Citric acid              | Organic acids         | 5.45 (2.63, 11.30)              | <0.0001        | <0.0001 | 0.00014                              |
| Isocitric acid           | Organic acids         | 3.95 (2.41, 6.50)               | <0.0001        | <0.0001 | <0.0001                              |
| Homovanillic acid        | Phenols               | 3.03 (1.90, 4.84)               | <0.0001        | <0.0001 | <0.0001                              |
| Hydroxyphenyllactic acid | Phenylpropanoic acids | 2.00 (1.40, 2.86)               | 0.00015        | 0.00039 | 0.0043                               |
| Butyric acid             | SCFAs                 | 1.58 (1.10, 2.28)               | 0.013          | 0.015   | 0.38                                 |
| Ethylmethylacetic acid   | SCFAs                 | 1.33 (0.93, 1.90)               | 0.12           | 0.12    | 1.0                                  |
| Propanoic acid           | SCFAs                 | 2.83 (1.48, 5.42)               | 0.0016         | 0.0027  | 0.046                                |

a Adjusted for age, cigarette smoking, alcohol drinking, BMI, physical activity, CHFP score, medical history of hepatitis and cirrhosis, medical history of cholelithiasis and medical history of T2DM.

b Bonferroni corrected *P* values.

Supplementary Table ST6 Association between plasma metabolite concentrations and liver cancer risk for participants without seropositive HBsAg or self-reported history of hepatobiliary diseases at blood collection

| Metabolite               | Class                 | OR <sub>doubling</sub> (95% CI) | <i>P</i> value | FDR     | <i>P</i> <sub>Bon</sub> <sup>b</sup> |
|--------------------------|-----------------------|---------------------------------|----------------|---------|--------------------------------------|
| beta-Alanine             | Amino acids           | 0.82 (0.65, 1.04)               | 0.11           | 0.13    | 1.0                                  |
| Creatine                 | Amino acids           | 0.75 (0.49, 1.15)               | 0.18           | 0.20    | 1.0                                  |
| Lysine                   | Amino acids           | 0.58 (0.25, 1.32)               | 0.19           | 0.20    | 1.0                                  |
| Pipecolic acid           | Amino acids           | 1.72 (1.10, 2.69)               | 0.017          | 0.025   | 0.48                                 |
| Tyrosine                 | Amino acids           | 3.87 (1.75, 8.57)               | 0.00085        | 0.0018  | 0.024                                |
| GCA                      | Bile acids            | 1.70 (1.38, 2.09)               | <0.0001        | <0.0001 | <0.0001                              |
| GCDCA                    | Bile acids            | 1.85 (1.45, 2.38)               | <0.0001        | <0.0001 | <0.0001                              |
| GHCA                     | Bile acids            | 1.66 (1.14, 2.42)               | 0.0085         | 0.013   | 0.24                                 |
| GUDCA                    | Bile acids            | 1.22 (1.00, 1.48)               | 0.045          | 0.055   | 1.0                                  |
| TCA                      | Bile acids            | 1.66 (1.34, 2.04)               | <0.0001        | <0.0001 | <0.0001                              |
| TCDCA                    | Bile acids            | 1.60 (1.30, 1.98)               | <0.0001        | <0.0001 | 0.00029                              |
| TDCA                     | Bile acids            | 1.48 (1.18, 1.86)               | 0.00083        | 0.0018  | 0.023                                |
| D-Xylulose               | Carbohydrates         | 2.24 (1.14, 4.40)               | 0.019          | 0.027   | 0.54                                 |
| Fructose                 | Carbohydrates         | 1.27 (1.03, 1.55)               | 0.024          | 0.032   | 0.68                                 |
| Rhamnose                 | Carbohydrates         | 1.75 (1.28, 2.39)               | 0.00043        | 0.0012  | 0.012                                |
| Acetylcarnitine          | Carnitines            | 3.70 (2.03, 6.76)               | <0.0001        | <0.0001 | 0.00054                              |
| Myristoylcarnitine       | Carnitines            | 3.42 (1.57, 7.44)               | 0.0019         | 0.0033  | 0.053                                |
| Oleylcarnitine           | Carnitines            | 2.14 (1.30, 3.55)               | 0.0030         | 0.0049  | 0.083                                |
| Stearyl carnitine        | Carnitines            | 1.87 (1.26, 2.76)               | 0.0018         | 0.0033  | 0.051                                |
| 10Z-Heptadecenoic acid   | Fatty acids           | 1.55 (1.21, 1.98)               | 0.00046        | 0.0012  | 0.013                                |
| Aconitic acid            | Organic acids         | 6.28 (2.62, 15.04)              | <0.0001        | 0.00013 | 0.0010                               |
| Citric acid              | Organic acids         | 9.71 (3.66, 25.79)              | <0.0001        | <0.0001 | 0.00014                              |
| Isocitric acid           | Organic acids         | 6.47 (3.26, 12.82)              | <0.0001        | <0.0001 | <0.0001                              |
| Homovanillic acid        | Phenols               | 3.23 (1.71, 6.09)               | 0.00030        | 0.00093 | 0.0084                               |
| Hydroxyphenyllactic acid | Phenylpropanoic acids | 2.24 (1.37, 3.68)               | 0.0014         | 0.0028  | 0.039                                |
| Butyric acid             | SCFAs                 | 1.17 (0.75, 1.82)               | 0.48           | 0.48    | 1.0                                  |
| Ethylmethylacetic acid   | SCFAs                 | 1.46 (0.92, 2.32)               | 0.11           | 0.13    | 1.0                                  |
| Propanoic acid           | SCFAs                 | 2.43 (1.05, 5.61)               | 0.038          | 0.048   | 1.0                                  |

a Adjusted for age, cigarette smoking, alcohol drinking, BMI, physical activity, CHFP score, and history of T2DM.

b Bonferroni corrected *P* values.

Supplementary Table ST7 Association between plasma metabolite concentrations and liver cancer risk using Cox regression model

| Metabolite               | Class                 | HR <sub>doubling</sub> (95% CI) | <i>P</i> value | FDR     | <i>P</i> <sub>Bon</sub> <sup>b</sup> |
|--------------------------|-----------------------|---------------------------------|----------------|---------|--------------------------------------|
| beta-Alanine             | Amino acids           | 0.88 (0.80, 0.97)               | 0.010          | 0.049   | 1.0                                  |
| Creatine                 | Amino acids           | 0.65 (0.54, 0.78)               | <0.0001        | <0.0001 | 0.00067                              |
| Lysine                   | Amino acids           | 0.46 (0.32, 0.65)               | <0.0001        | 0.00024 | 0.0026                               |
| Pipecolic acid           | Amino acids           | 1.24 (1.05, 1.45)               | 0.009          | 0.047   | 1.0                                  |
| Tyrosine                 | Amino acids           | 2.42 (1.84, 3.20)               | <0.0001        | <0.0001 | <0.0001                              |
| GCA                      | Bile acids            | 1.25 (1.17, 1.33)               | <0.0001        | <0.0001 | <0.0001                              |
| GCDCA                    | Bile acids            | 1.30 (1.21, 1.40)               | <0.0001        | <0.0001 | <0.0001                              |
| GHCA                     | Bile acids            | 1.25 (1.13, 1.38)               | <0.0001        | 0.00020 | 0.0020                               |
| GUDCA                    | Bile acids            | 1.14 (1.06, 1.23)               | 0.00035        | 0.0035  | 0.066                                |
| TCA                      | Bile acids            | 1.25 (1.19, 1.32)               | <0.0001        | <0.0001 | <0.0001                              |
| TCDCA                    | Bile acids            | 1.29 (1.22, 1.37)               | <0.0001        | <0.0001 | <0.0001                              |
| TDCA                     | Bile acids            | 1.16 (1.08, 1.24)               | <0.0001        | 0.00034 | 0.0044                               |
| D-Xylulose               | Carbohydrates         | 1.65 (1.31, 2.09)               | <0.0001        | 0.00036 | 0.0050                               |
| Fructose                 | Carbohydrates         | 1.15 (1.05, 1.25)               | 0.0017         | 0.012   | 0.31                                 |
| Rhamnose                 | Carbohydrates         | 1.22 (1.08, 1.38)               | 0.0016         | 0.012   | 0.29                                 |
| Acetylcarnitine          | Carnitines            | 1.31 (1.05, 1.63)               | 0.016          | 0.063   | 1.0                                  |
| Myristoylcarnitine       | Carnitines            | 1.31 (1.05, 1.63)               | 0.015          | 0.063   | 1.0                                  |
| Oleylcarnitine           | Carnitines            | 1.27 (1.05, 1.53)               | 0.012          | 0.054   | 1.0                                  |
| Stearyl carnitine        | Carnitines            | 1.20 (1.04, 1.39)               | 0.012          | 0.053   | 1.0                                  |
| 10Z-Heptadecenoic acid   | Fatty acids           | 1.07 (0.97, 1.17)               | 0.16           | 0.35    | 1.0                                  |
| Aconitic acid            | Organic acids         | 1.76 (1.28, 2.43)               | 0.00053        | 0.0049  | 0.098                                |
| Citric acid              | Organic acids         | 2.22 (1.55, 3.19)               | <0.0001        | 0.00024 | 0.0029                               |
| Isocitric acid           | Organic acids         | 1.71 (1.36, 2.14)               | <0.0001        | <0.0001 | 0.00056                              |
| Homovanillic acid        | Phenols               | 1.86 (1.53, 2.25)               | <0.0001        | <0.0001 | <0.0001                              |
| Hydroxyphenyllactic acid | Phenylpropanoic acids | 1.64 (1.38, 1.95)               | <0.0001        | <0.0001 | <0.0001                              |
| Butyric acid             | SCFAs                 | 1.16 (0.96, 1.41)               | 0.12           | 0.29    | 1.0                                  |
| Ethylmethylacetic acid   | SCFAs                 | 1.17 (0.99, 1.38)               | 0.072          | 0.22    | 1.0                                  |
| Propanoic acid           | SCFAs                 | 1.47 (1.09, 1.98)               | 0.012          | 0.053   | 1.0                                  |

a Adjusted for age, cigarette smoking, alcohol drinking, BMI, physical activity, CHFP score, medical history of hepatitis and cirrhosis, medical history of cholelithiasis and medical history of T2DM.

b Bonferroni corrected *P* values.
